# Supplementary material
Source: publisher figshare collection journal article supplement (https://geolsoc.figshare.com/ndownloader/files/34986154)
Supplement: Supplementary file 1 [file 34986154]

## Sheet: PlotDat7
Source sheet	entregar - entregar	0.577616	0.0744872	0.543504	0.0706383	0.558806	0.0723004	0.574259	0.0739651	0.589866	0.0756324	0.605627	0.0773023	0.621545	0.0789747	0.536563	0.07	0.537708	0.07	0.535424	0.07	0.542391	0.0706383	0.594897	0.0758934	0.592697	0.0759334	0.627355	0.0765711	0.613219	0.0768272	0.595852	0.0756966
Plot name	Concordia0	0.577883	0.0747505	0.543459	0.0706652	0.558759	0.072328	0.574211	0.0739934	0.589816	0.0756613	0.605576	0.0773318	0.621492	0.079005	0.536563	0.07	0.539695	0.0702174	0.536563	0.0701253	0.557657	0.0723004	0.594711	0.0760927	0.592539	0.0761047	0.627132	0.0768034	0.613047	0.0770083	0.595727	0.075809
Plot Type	1	0.606317	0.0750368	0.543327	0.07069	0.558623	0.0723534	0.574071	0.0740194	0.589672	0.0756879	0.605427	0.077359	0.621338	0.0790328	0.539695	0.0703433	0.542834	0.0705601	0.539695	0.0704692	0.573073	0.0739651	0.594193	0.0762607	0.592095	0.0762495	0.626504	0.0770013	0.612557	0.0771669	0.595376	0.0759014
1st free col	35	0.596707	0.0758452	0.54312	0.0707106	0.558409	0.0723745	0.57385	0.0740409	0.589443	0.07571	0.605192	0.0773816	0.621096	0.0790559	0.542834	0.0706867	0.545979	0.070903	0.542834	0.0708132	0.588642	0.0756324	0.593352	0.0763942	0.591374	0.0763652	0.625483	0.0771609	0.611758	0.0772997	0.594807	0.0759713
Sigma Level	1	IsoLine	IsoLine	0.542853	0.0707253	0.558134	0.0723896	0.573566	0.0740564	0.58915	0.0757258	0.604889	0.0773978	0.620784	0.0790724	0.545979	0.0710302	0.549131	0.071246	0.545979	0.0711574	0.604365	0.0773023	0.592205	0.0764905	0.590391	0.0764495	0.624089	0.0772792	0.610667	0.0774042	0.594035	0.0760169
Absolute Errs	TRUE			0.54255	0.070733	0.55782	0.0723974	0.573242	0.0740644	0.588816	0.075734	0.604545	0.0774062	0.620429	0.079081	0.549131	0.0713738	0.552289	0.0715891	0.549131	0.0715016	0.620244	0.0789747	0.590774	0.0765479	0.589164	0.0765007	0.62235	0.0773538	0.609303	0.0774784	0.593083	0.0760369
Symbol Type	1			0.542233	0.070733	0.557493	0.0723974	0.572904	0.0740644	0.588468	0.075734	0.604185	0.0774062	0.620058	0.079081	0.552289	0.0717175	0.555453	0.0719323	0.552289	0.071846	IsoLine	IsoLine	0.589086	0.0765651	0.587718	0.0765179	0.620298	0.0773834	0.607695	0.0775208	0.591975	0.0760308
Inverse Plot	FALSE			0.541929	0.0707253	0.557179	0.0723896	0.57258	0.0740564	0.588133	0.0757258	0.603841	0.0773978	0.619703	0.0790724	0.555453	0.0720613	0.558624	0.0722756	0.555453	0.0721904			0.587176	0.076542	0.58608	0.0765006	0.617974	0.0773672	0.605873	0.0775305	0.590743	0.0759986
Color Plot	TRUE			0.541663	0.0707106	0.556904	0.0723745	0.572296	0.0740409	0.58784	0.07571	0.603538	0.0773816	0.619391	0.0790559	0.558624	0.0724053	0.561801	0.072619	0.558624	0.072535			0.585079	0.0764788	0.584283	0.0764493	0.615423	0.0773057	0.603872	0.0775075	0.589419	0.0759413
3D plot	FALSE			0.541455	0.07069	0.55669	0.0723534	0.572075	0.0740194	0.587612	0.0756879	0.603303	0.077359	0.619149	0.0790328	0.561801	0.0727493	0.564985	0.0729625	0.561801	0.0728797			0.582837	0.0763768	0.582361	0.0763649	0.612695	0.0772001	0.601732	0.0774521	0.58804	0.0758605
Linear	FALSE			0.541324	0.0706652	0.556554	0.072328	0.571935	0.0739934	0.587468	0.0756613	0.603154	0.0773318	0.618995	0.079005	0.564985	0.0730935	0.568176	0.0733061	0.564985	0.0732245			0.580494	0.0762381	0.580353	0.0762491	0.609843	0.0770523	0.599494	0.0773654	0.586643	0.0757583
Data Range	CB8:CF12			0.541279	0.0706383	0.556508	0.0723004	0.571887	0.0739651	0.587418	0.0756324	0.603103	0.0773023	0.618942	0.0789747	0.568176	0.0734378	0.571372	0.0736499	0.568176	0.0735694			0.578094	0.0760653	0.578296	0.0761041	0.606922	0.0768654	0.597202	0.0772491	0.585267	0.0756376
Filled Symbols	FALSE			0.541324	0.0706113	0.556554	0.0722728	0.571935	0.0739368	0.587468	0.0756034	0.603154	0.0772727	0.618995	0.0789445	0.571372	0.0737822	0.574576	0.0739937	0.571372	0.0739144			0.575686	0.0758618	0.576231	0.0759327	0.60399	0.0766428	0.5949	0.0771056	0.583949	0.0755016
ConcAge	TRUE			0.541455	0.0705865	0.55669	0.0722474	0.572075	0.0739108	0.587612	0.0755769	0.603303	0.0772455	0.619149	0.0789166	0.574576	0.0741267	0.577786	0.0743377	0.574576	0.0742596			0.573314	0.0756315	0.574198	0.0757384	0.601102	0.076389	0.592634	0.0769374	0.582725	0.075354
ConcSwap	FALSE			0.541663	0.070566	0.556904	0.0722263	0.572296	0.0738893	0.58784	0.0755548	0.603538	0.0772229	0.619391	0.0788935	0.577786	0.0744713	0.581002	0.0746818	0.577786	0.0746048			0.571027	0.075379	0.572237	0.0755248	0.598317	0.0761088	0.590446	0.0767481	0.581628	0.0751989
1st Symbol-row	1			0.541929	0.0705512	0.557179	0.0722112	0.57258	0.0738738	0.588133	0.075539	0.603841	0.0772067	0.619703	0.078877	0.581002	0.074816	0.584225	0.075026	0.581002	0.0749502			0.568867	0.0751091	0.570386	0.0752962	0.595687	0.0758078	0.588381	0.0765411	0.580688	0.0750405
				0.542233	0.0705436	0.557493	0.0722034	0.572904	0.0738658	0.588468	0.0755307	0.604185	0.0771983	0.620058	0.0788684	0.584225	0.0751608	0.587455	0.0753703	0.584225	0.0752956			0.566878	0.074827	0.56868	0.0750569	0.593263	0.0754918	0.586477	0.0763206	0.579932	0.0748831
				0.54255	0.0705436	0.55782	0.0722034	0.573242	0.0738658	0.588816	0.0755307	0.604545	0.0771983	0.620429	0.0788684	0.587455	0.0755057	0.590691	0.0757147	0.587455	0.0756412			0.565098	0.0745384	0.567154	0.0748117	0.591094	0.0751669	0.584773	0.0760909	0.579379	0.0747311
				0.542853	0.0705512	0.558134	0.0722112	0.573566	0.0738738	0.58915	0.075539	0.604889	0.0772067	0.620784	0.078877	0.590691	0.0758508	0.593934	0.0760592	0.590691	0.0759869			0.563562	0.0742488	0.565837	0.0745653	0.589222	0.0748395	0.583301	0.0758563	0.579045	0.0745885
				0.54312	0.070566	0.558409	0.0722263	0.57385	0.0738893	0.589443	0.0755548	0.605192	0.0772229	0.621096	0.0788935	0.593934	0.0761959	0.597183	0.0764038	0.593934	0.0763327			0.562299	0.0739638	0.564754	0.0743225	0.587682	0.0745159	0.58209	0.0756216	0.578938	0.0744592
				0.543327	0.0705865	0.558623	0.0722474	0.574071	0.0739108	0.589672	0.0755769	0.605427	0.0772455	0.621338	0.0789166	0.597183	0.0765412	0.600439	0.0767486	0.597183	0.0766786			0.561334	0.073689	0.563927	0.074088	0.586505	0.0742025	0.581163	0.0753912	0.579062	0.0743469
				0.543459	0.0706113	0.558759	0.0722728	0.574211	0.0739368	0.589816	0.0756034	0.605576	0.0772727	0.621492	0.0789445	0.600439	0.0768866	0.603702	0.0770934	0.600439	0.0770246			0.560687	0.0734298	0.563371	0.0738664	0.585713	0.0739053	0.580539	0.0751696	0.579414	0.0742544
				0.543504	0.0706383	0.558806	0.0723004	0.574259	0.0739651	0.589866	0.0756324	0.605627	0.0773023	0.621545	0.0789747	0.603702	0.0772321	0.606971	0.0774384	0.603702	0.0773708			0.560368	0.0731911	0.563098	0.073662	0.585322	0.0736301	0.58023	0.0749612	0.579983	0.0741845
				ConcTikEll	ConcTikEll	ConcTikEll	ConcTikEll	ConcTikEll	ConcTikEll	ConcTikEll	ConcTikEll	ConcTikEll	ConcTikEll	ConcTikEll	ConcTikEll	0.606971	0.0775777	0.610247	0.0777834	0.606971	0.077717			0.560386	0.0729776	0.563113	0.0734788	0.58534	0.0733824	0.580241	0.07477	0.580754	0.0741389
																0.610247	0.0779234	0.613529	0.0781286	0.610247	0.0780634			0.560738	0.0727936	0.563415	0.0733204	0.585767	0.0731668	0.580573	0.0745997	0.581707	0.0741189
																0.613529	0.0782692	0.616819	0.0784739	0.613529	0.0784098			0.56142	0.0726424	0.563999	0.0731898	0.586593	0.0729876	0.581219	0.0744537	0.582814	0.0741251
																0.616819	0.0786152	0.620115	0.0788193	0.616819	0.0787564			0.562416	0.0725272	0.564853	0.0730896	0.587803	0.0728483	0.582167	0.0743347	0.584047	0.0741572
																0.620115	0.0789612	0.623417	0.0791648	0.620115	0.0791031			0.563708	0.0724502	0.56596	0.0730217	0.589374	0.0727516	0.583397	0.0742452	0.585371	0.0742145
																0.623417	0.0793074	0.626727	0.0795104	0.623417	0.0794499			0.565271	0.0724128	0.5673	0.0729874	0.591274	0.0726994	0.584886	0.0741868	0.58675	0.0742954
																0.626727	0.0796536	0.630043	0.0798562	0.626727	0.0797968			0.567075	0.0724158	0.568846	0.0729875	0.593468	0.0726926	0.586606	0.0741606	0.588147	0.0743975
																0.630043	0.08	0.631425	0.08	0.628669	0.08			0.569083	0.072459	0.570567	0.0730219	0.595911	0.0727315	0.588522	0.0741673	0.589523	0.0745183
																0.630043	0.08	ConcBand	ConcBand	ConcBand	ConcBand			0.571258	0.0725418	0.572431	0.0730899	0.598557	0.0728153	0.590597	0.0742066	0.590841	0.0746543
																IsoLine	IsoLine							0.573556	0.0726624	0.574401	0.0731902	0.601354	0.0729423	0.592792	0.0742778	0.592065	0.0748018
																								0.575933	0.0728186	0.576439	0.073321	0.604247	0.0731101	0.595062	0.0743795	0.593162	0.0749569
																								0.578343	0.0730072	0.578505	0.0734795	0.607181	0.0733154	0.597365	0.0745098	0.594101	0.0751153
																								0.580739	0.0732246	0.580559	0.0736628	0.610098	0.0735542	0.599655	0.074666	0.594858	0.0752727
																								0.583074	0.0734666	0.582561	0.0738672	0.612941	0.0738218	0.601887	0.0748452	0.595411	0.0754247
																								0.585303	0.0737285	0.584472	0.0740889	0.615656	0.0741131	0.604019	0.0750438	0.595745	0.0755673
																								0.587382	0.0740051	0.586254	0.0743234	0.618189	0.0744224	0.606008	0.0752581	0.595852	0.0756966
																								0.589271	0.0742912	0.587874	0.0745662	0.62049	0.0747436	0.607816	0.0754837	Cyan	Cyan
																								0.590934	0.074581	0.589299	0.0748126	0.622516	0.0750705	0.609408	0.0757165
																								0.592337	0.074869	0.590502	0.0750579	0.624227	0.0753968	0.610753	0.0759517
																								0.593453	0.0751496	0.591459	0.0752971	0.625589	0.0757161	0.611824	0.0761848
																								0.594262	0.0754172	0.592152	0.0755257	0.626575	0.0760221	0.612601	0.0764113
																								0.594746	0.0756668	0.592568	0.0757392	0.627168	0.076309	0.613069	0.0766269
																								0.594897	0.0758934	0.592697	0.0759334	0.627355	0.0765711	0.613219	0.0768272

## Sheet: PlotDat10
Source sheet	entregar - entregar	0	0	450	0	0	0
Plot name	ProbDens1	1.5	0	500	0	2998.5	0
Plot Type	16	3	0	500	3
1st free col	9	4.5	0	450	3
Sigma Level	2	6	0	450	0
Absolute Errs	FALSE	7.5	0	ErrBox	ErrBox
Symbol Type	1	9	0	500	0
Inverse Plot	FALSE	10.5	0	550	0
Color Plot	TRUE	12	0	550	1
3D plot	FALSE	13.5	0	500	1
Linear	FALSE	15	0	500	0
Data Range	CI72:CJ96	16.5	0	ErrBox	ErrBox
Filled Symbols	FALSE	18	0	550	0
ConcAge	FALSE	19.5	0	600	0
ConcSwap	FALSE	21	0	600	6
1st Symbol-row	1	22.5	0	550	6
		24	0	550	0
		25.5	0	ErrBox	ErrBox
		27	0	600	0
		28.5	0	650	0
		30	0	650	6
		31.5	0	600	6
		33	0	600	0
		34.5	0	ErrBox	ErrBox
		36	0	650	0
		37.5	0	700	0
		39	0	700	4
		40.5	0	650	4
		42	0	650	0
		43.5	0	ErrBox	ErrBox
		45	0	750	0
		46.5	0	800	0
		48	0	800	1
		49.5	0	750	1
		51	0	750	0
		52.5	0	ErrBox	ErrBox
		54	0	850	0
		55.5	0	900	0
		57	0	900	1
		58.5	0	850	1
		60	0	850	0
		61.5	0	ErrBox	ErrBox
		63	0	900	0
		64.5	0	950	0
		66	0	950	1
		67.5	0	900	1
		69	0	900	0
		70.5	0	ErrBox	ErrBox
		72	0	1850	0
		73.5	0	1900	0
		75	0	1900	1
		76.5	0	1850	1
		78	0	1850	0
		79.5	0	ErrBox	ErrBox
		81	0	2050	0
		82.5	0	2100	0
		84	0	2100	1
		85.5	0	2050	1
		87	0	2050	0
		88.5	0	ErrBox	ErrBox
		90	0
		91.5	0
		93	0
		94.5	0
		96	0
		97.5	0
		99	0
		100.5	0
		102	0
		103.5	0
		105	0
		106.5	0
		108	0
		109.5	0
		111	0
		112.5	0
		114	0
		115.5	0
		117	0
		118.5	0
		120	0
		121.5	0
		123	0
		124.5	0
		126	0
		127.5	0
		129	0
		130.5	0
		132	0
		133.5	0
		135	0
		136.5	0
		138	0
		139.5	0
		141	0
		142.5	0
		144	0
		145.5	0
		147	0
		148.5	0
		150	0
		151.5	0
		153	0
		154.5	0
		156	0
		157.5	0
		159	0
		160.5	0
		162	0
		163.5	0
		165	0
		166.5	0
		168	0
		169.5	0
		171	0
		172.5	0
		174	0
		175.5	0
		177	0
		178.5	0
		180	0
		181.5	0
		183	0
		184.5	0
		186	0
		187.5	0
		189	0
		190.5	0
		192	0
		193.5	0
		195	0
		196.5	0
		198	0
		199.5	0
		201	0
		202.5	0
		204	0
		205.5	0
		207	0
		208.5	0
		210	0
		211.5	0
		213	0
		214.5	0
		216	0
		217.5	0
		219	0
		220.5	0
		222	0
		223.5	0
		225	0
		226.5	0
		228	0
		229.5	0
		231	0
		232.5	0
		234	0
		235.5	0
		237	0
		238.5	0
		240	0
		241.5	0
		243	0
		244.5	0
		246	0
		247.5	0
		249	0
		250.5	0
		252	0
		253.5	0
		255	0
		256.5	0
		258	0
		259.5	0
		261	0
		262.5	0
		264	0
		265.5	0
		267	0
		268.5	0
		270	0
		271.5	0
		273	0
		274.5	0
		276	0
		277.5	0
		279	0
		280.5	0
		282	0
		283.5	0
		285	0
		286.5	0
		288	0
		289.5	0
		291	0
		292.5	0
		294	0
		295.5	0
		297	0
		298.5	0
		300	0
		301.5	0
		303	0
		304.5	0
		306	0
		307.5	0
		309	0
		310.5	0
		312	0
		313.5	0
		315	0
		316.5	0
		318	0
		319.5	0
		321	0
		322.5	0
		324	0
		325.5	0
		327	0
		328.5	0
		330	0
		331.5	0
		333	0
		334.5	0
		336	0
		337.5	0
		339	0
		340.5	0
		342	0
		343.5	0
		345	0
		346.5	0
		348	0
		349.5	0
		351	0
		352.5	0
		354	0
		355.5	0
		357	0
		358.5	0
		360	0
		361.5	0
		363	0
		364.5	0
		366	0
		367.5	0
		369	0
		370.5	0
		372	0
		373.5	0
		375	0
		376.5	0
		378	4.19898e-08
		379.5	4.89284e-08
		381	5.69398e-08
		382.5	6.61774e-08
		384	7.68141e-08
		385.5	8.90453e-08
		387	1.03091e-07
		388.5	1.19197e-07
		390	1.37642e-07
		391.5	1.58735e-07
		393	1.82824e-07
		394.5	2.60332e-07
		396	3.13641e-07
		397.5	3.80221e-07
		399	4.63947e-07
		400.5	5.69862e-07
		402	7.04506e-07
		403.5	8.76307e-07
		405	1.09607e-06
		406.5	1.37754e-06
		408	1.73811e-06
		409.5	2.19956e-06
		411	2.789e-06
		412.5	3.53988e-06
		414	4.49305e-06
		415.5	5.69799e-06
		417	7.21402e-06
		418.5	9.21195e-06
		420	1.16242e-05
		421.5	1.46202e-05
		423	1.83201e-05
		424.5	2.28626e-05
		426	2.84063e-05
		427.5	3.51308e-05
		429	4.32373e-05
		430.5	5.29495e-05
		432	6.45132e-05
		433.5	7.81961e-05
		435	9.42864e-05
		436.5	0.000113092
		438	0.000134936
		439.5	0.000160158
		441	0.000189106
		442.5	0.000222133
		444	0.000259597
		445.5	0.000301846
		447	0.000349218
		448.5	0.000402034
		450	0.000460582
		451.5	0.000525116
		453	0.000595836
		454.5	0.000672934
		456	0.000756385
		457.5	0.000846203
		459	0.000942254
		460.5	0.00104428
		462	0.00115189
		463.5	0.00126452
		465	0.00138146
		466.5	0.00150182
		468	0.00162458
		469.5	0.00174839
		471	0.00187187
		472.5	0.00199348
		474	0.00211144
		475.5	0.00222398
		477	0.00232929
		478.5	0.00242545
		480	0.00251069
		481.5	0.00258335
		483	0.002642
		484.5	0.00268534
		486	0.00271247
		487.5	0.00272285
		489	0.00271633
		490.5	0.00269318
		492	0.00265414
		493.5	0.00260035
		495	0.00253346
		496.5	0.00245531
		498	0.00236822
		499.5	0.00227472
		501	0.00217749
		502.5	0.00207931
		504	0.00198298
		505.5	0.0018911
		507	0.00180617
		508.5	0.00173045
		510	0.00166573
		511.5	0.00161349
		513	0.00157482
		514.5	0.0015502
		516	0.00153978
		517.5	0.00154318
		519	0.00155965
		520.5	0.00158803
		522	0.00162687
		523.5	0.00167449
		525	0.00172905
		526.5	0.00178867
		528	0.00185157
		529.5	0.00191586
		531	0.00198006
		532.5	0.00204286
		534	0.00210328
		535.5	0.00216069
		537	0.00221471
		538.5	0.00226538
		540	0.00231305
		541.5	0.00235833
		543	0.00240205
		544.5	0.0024452
		546	0.00248887
		547.5	0.00253419
		549	0.00258223
		550.5	0.002634
		552	0.00269035
		553.5	0.00275197
		555	0.00281931
		556.5	0.00289274
		558	0.00297227
		559.5	0.00305785
		561	0.00314901
		562.5	0.00324528
		564	0.00334613
		565.5	0.00345072
		567	0.00355837
		568.5	0.00366815
		570	0.00377925
		571.5	0.00389085
		573	0.00400232
		574.5	0.00411315
		576	0.00422303
		577.5	0.00433193
		579	0.00444009
		580.5	0.00454806
		582	0.00465671
		583.5	0.00476716
		585	0.00488069
		586.5	0.00499862
		588	0.00512206
		589.5	0.00525174
		591	0.00538776
		592.5	0.00552922
		594	0.00567427
		595.5	0.00581985
		597	0.00596178
		598.5	0.00609492
		600	0.0062135
		601.5	0.0063116
		603	0.0063836
		604.5	0.00642487
		606	0.00643211
		607.5	0.00640381
		609	0.00634046
		610.5	0.00624454
		612	0.00612031
		613.5	0.00597341
		615	0.00581039
		616.5	0.00563813
		618	0.00546326
		619.5	0.00529175
		621	0.0051285
		622.5	0.00497719
		624	0.0048402
		625.5	0.00471867
		627	0.0046127
		628.5	0.00452156
		630	0.00444391
		631.5	0.00437807
		633	0.00432219
		634.5	0.00427442
		636	0.00423298
		637.5	0.00419627
		639	0.00416285
		640.5	0.00413148
		642	0.00410105
		643.5	0.00407059
		645	0.00403927
		646.5	0.00400633
		648	0.00397109
		649.5	0.00393294
		651	0.00389133
		652.5	0.0038458
		654	0.00379594
		655.5	0.0037414
		657	0.003682
		658.5	0.00361753
		660	0.00354793
		661.5	0.00347321
		663	0.00339355
		664.5	0.0033091
		666	0.00322016
		667.5	0.00312707
		669	0.00303022
		670.5	0.00293016
		672	0.00282735
		673.5	0.00272233
		675	0.00261565
		676.5	0.00250788
		678	0.00239956
		679.5	0.0022912
		681	0.0021834
		682.5	0.0020766
		684	0.00197125
		685.5	0.00186777
		687	0.00176654
		688.5	0.00166788
		690	0.00157209
		691.5	0.00147942
		693	0.00139006
		694.5	0.00130423
		696	0.00122202
		697.5	0.00114359
		699	0.00106899
		700.5	0.000998261
		702	0.000931423
		703.5	0.00086848
		705	0.000809409
		706.5	0.000754138
		708	0.000702685
		709.5	0.000654933
		711	0.000610765
		712.5	0.000570154
		714	0.000532949
		715.5	0.00049903
		717	0.000468271
		718.5	0.000440536
		720	0.000415685
		721.5	0.000393572
		723	0.000374049
		724.5	0.000356963
		726	0.000342162
		727.5	0.000329495
		729	0.00031881
		730.5	0.000309957
		732	0.000302792
		733.5	0.000297173
		735	0.000292884
		736.5	0.000289964
		738	0.000288192
		739.5	0.000287448
		741	0.000287622
		742.5	0.000288614
		744	0.000290324
		745.5	0.00029265
		747	0.000295477
		748.5	0.000298795
		750	0.000302491
		751.5	0.000306499
		753	0.000310759
		754.5	0.000315217
		756	0.000319821
		757.5	0.000324528
		759	0.000329296
		760.5	0.00033409
		762	0.00033884
		763.5	0.000343596
		765	0.000348287
		766.5	0.000352892
		768	0.000357389
		769.5	0.000361729
		771	0.000365969
		772.5	0.000370054
		774	0.000373972
		775.5	0.000377676
		777	0.000381242
		778.5	0.000384616
		780	0.000387791
		781.5	0.000390763
		783	0.00039353
		784.5	0.000396091
		786	0.000398443
		787.5	0.000400587
		789	0.000402486
		790.5	0.000404226
		792	0.000405762
		793.5	0.000407096
		795	0.000408234
		796.5	0.00040918
		798	0.000409941
		799.5	0.000410522
		801	0.000410931
		802.5	0.000411175
		804	0.000411263
		805.5	0.000411202
		807	0.000411003
		808.5	0.000410675
		810	0.000410227
		811.5	0.000409671
		813	0.000409018
		814.5	0.000408278
		816	0.000407462
		817.5	0.000406584
		819	0.000405655
		820.5	0.000404686
		822	0.000403691
		823.5	0.000402681
		825	0.000401669
		826.5	0.000400668
		828	0.00039969
		829.5	0.000398746
		831	0.000397849
		832.5	0.000397012
		834	0.000396245
		835.5	0.000395561
		837	0.00039497
		838.5	0.000394482
		840	0.000394109
		841.5	0.00039386
		843	0.000393745
		844.5	0.000393772
		846	0.000393949
		847.5	0.000394285
		849	0.000394785
		850.5	0.000395457
		852	0.000396305
		853.5	0.000397335
		855	0.000398551
		856.5	0.000399955
		858	0.000401549
		859.5	0.000403336
		861	0.000405315
		862.5	0.000407486
		864	0.000409848
		865.5	0.000412398
		867	0.000415132
		868.5	0.000418048
		870	0.000421138
		871.5	0.000424397
		873	0.000427818
		874.5	0.000431393
		876	0.000435111
		877.5	0.000438964
		879	0.00044294
		880.5	0.000447027
		882	0.000451213
		883.5	0.000455484
		885	0.000459825
		886.5	0.000464222
		888	0.00046866
		889.5	0.00047312
		891	0.000477587
		892.5	0.000482044
		894	0.000486472
		895.5	0.000490853
		897	0.000495168
		898.5	0.000499399
		900	0.000503527
		901.5	0.000507533
		903	0.000511398
		904.5	0.000515103
		906	0.000518629
		907.5	0.000521958
		909	0.000525071
		910.5	0.000527952
		912	0.000530583
		913.5	0.000532947
		915	0.000535029
		916.5	0.000536814
		918	0.000538287
		919.5	0.000539435
		921	0.000540246
		922.5	0.000540708
		924	0.000540811
		925.5	0.000540546
		927	0.000539905
		928.5	0.000538881
		930	0.00053747
		931.5	0.000535666
		933	0.000533468
		934.5	0.000530874
		936	0.000527883
		937.5	0.000524497
		939	0.000520719
		940.5	0.000516552
		942	0.000512002
		943.5	0.000507075
		945	0.000501779
		946.5	0.000496123
		948	0.000490118
		949.5	0.000483773
		951	0.000477102
		952.5	0.000470118
		954	0.000462834
		955.5	0.000455267
		957	0.000447432
		958.5	0.000439344
		960	0.000431023
		961.5	0.000422484
		963	0.000413747
		964.5	0.000404829
		966	0.00039575
		967.5	0.000386529
		969	0.000377184
		970.5	0.000367734
		972	0.000358199
		973.5	0.000348598
		975	0.000338949
		976.5	0.000329271
		978	0.000319582
		979.5	0.0003099
		981	0.000300241
		982.5	0.000290623
		984	0.000281061
		985.5	0.000271571
		987	0.000262168
		988.5	0.000252866
		990	0.000243678
		991.5	0.000234617
		993	0.000225694
		994.5	0.00021692
		996	0.000208306
		997.5	0.00019986
		999	0.000191592
		1000.5	0.000183508
		1002	0.000175579
		1003.5	0.000167887
		1005	0.000160397
		1006.5	0.000153113
		1008	0.000146039
		1009.5	0.000139177
		1011	0.000132529
		1012.5	0.000126096
		1014	0.00011988
		1015.5	0.00011388
		1017	0.000108096
		1018.5	0.000102526
		1020	9.71684e-05
		1021.5	9.20215e-05
		1023	8.70823e-05
		1024.5	8.23477e-05
		1026	7.78142e-05
		1027.5	7.3478e-05
		1029	6.93348e-05
		1030.5	6.53802e-05
		1032	6.16095e-05
		1033.5	5.80178e-05
		1035	5.46e-05
		1036.5	5.13508e-05
		1038	4.82649e-05
		1039.5	4.53369e-05
		1041	4.26017e-05
		1042.5	3.99737e-05
		1044	3.7487e-05
		1045.5	3.5136e-05
		1047	3.29153e-05
		1048.5	3.08193e-05
		1050	2.88426e-05
		1051.5	2.69801e-05
		1053	2.52263e-05
		1054.5	2.35763e-05
		1056	2.2025e-05
		1057.5	2.05675e-05
		1059	1.91992e-05
		1060.5	1.79155e-05
		1062	1.67118e-05
		1063.5	1.5584e-05
		1065	1.45278e-05
		1066.5	1.35394e-05
		1068	1.26148e-05
		1069.5	1.17505e-05
		1071	1.09428e-05
		1072.5	1.01886e-05
		1074	9.48453e-06
		1075.5	8.82762e-06
		1077	8.21496e-06
		1078.5	7.6438e-06
		1080	7.11154e-06
		1081.5	6.61573e-06
		1083	6.15401e-06
		1084.5	5.7242e-06
		1086	5.32422e-06
		1087.5	4.9521e-06
		1089	4.606e-06
		1090.5	4.2842e-06
		1092	3.98505e-06
		1093.5	3.70703e-06
		1095	3.4487e-06
		1096.5	3.20874e-06
		1098	2.98586e-06
		1099.5	2.77891e-06
		1101	2.58678e-06
		1102.5	2.40844e-06
		1104	2.24294e-06
		1105.5	2.08938e-06
		1107	1.94693e-06
		1108.5	1.81481e-06
		1110	1.6923e-06
		1111.5	1.57872e-06
		1113	1.47345e-06
		1114.5	1.3759e-06
		1116	1.28553e-06
		1117.5	1.20184e-06
		1119	1.12436e-06
		1120.5	1.05264e-06
		1122	9.86296e-07
		1123.5	9.24938e-07
		1125	8.68221e-07
		1126.5	8.15818e-07
		1128	7.6743e-07
		1129.5	6.85925e-07
		1131	6.49624e-07
		1132.5	6.15937e-07
		1134	5.84714e-07
		1135.5	5.55811e-07
		1137	5.29093e-07
		1138.5	5.0443e-07
		1140	4.81701e-07
		1141.5	4.60791e-07
		1143	4.4159e-07
		1144.5	4.23996e-07
		1146	4.07911e-07
		1147.5	3.93244e-07
		1149	3.79909e-07
		1150.5	3.67823e-07
		1152	3.56911e-07
		1153.5	3.471e-07
		1155	3.38322e-07
		1156.5	3.30514e-07
		1158	3.23616e-07
		1159.5	3.17571e-07
		1161	3.12327e-07
		1162.5	3.07834e-07
		1164	3.04047e-07
		1165.5	3.00922e-07
		1167	2.98419e-07
		1168.5	2.965e-07
		1170	2.95129e-07
		1171.5	2.94274e-07
		1173	2.93905e-07
		1174.5	2.93992e-07
		1176	2.9451e-07
		1177.5	2.95433e-07
		1179	2.58864e-07
		1180.5	2.63744e-07
		1182	2.68708e-07
		1183.5	3.15068e-07
		1185	3.21556e-07
		1186.5	3.28171e-07
		1188	3.34918e-07
		1189.5	3.41798e-07
		1191	3.48814e-07
		1192.5	3.55969e-07
		1194	3.63265e-07
		1195.5	3.70705e-07
		1197	3.78291e-07
		1198.5	3.86027e-07
		1200	3.93915e-07
		1201.5	4.01958e-07
		1203	4.1016e-07
		1204.5	4.18522e-07
		1206	4.27048e-07
		1207.5	4.35742e-07
		1209	4.44606e-07
		1210.5	4.53643e-07
		1212	4.62857e-07
		1213.5	4.72251e-07
		1215	4.81829e-07
		1216.5	4.91594e-07
		1218	5.01549e-07
		1219.5	5.11697e-07
		1221	5.22044e-07
		1222.5	5.32592e-07
		1224	5.43345e-07
		1225.5	5.54306e-07
		1227	5.65481e-07
		1228.5	5.76872e-07
		1230	5.88483e-07
		1231.5	6.0032e-07
		1233	6.12385e-07
		1234.5	6.24683e-07
		1236	6.37219e-07
		1237.5	6.49997e-07
		1239	6.63021e-07
		1240.5	6.76295e-07
		1242	6.89825e-07
		1243.5	7.03615e-07
		1245	7.1767e-07
		1246.5	7.31994e-07
		1248	7.46592e-07
		1249.5	7.61471e-07
		1251	7.76633e-07
		1252.5	7.92086e-07
		1254	8.07833e-07
		1255.5	8.23881e-07
		1257	8.40235e-07
		1258.5	8.56899e-07
		1260	8.73881e-07
		1261.5	8.91185e-07
		1263	9.08817e-07
		1264.5	9.26783e-07
		1266	9.4509e-07
		1267.5	9.63742e-07
		1269	9.82747e-07
		1270.5	1.00211e-06
		1272	1.02184e-06
		1273.5	1.04194e-06
		1275	1.06242e-06
		1276.5	1.08328e-06
		1278	1.10453e-06
		1279.5	1.12619e-06
		1281	1.14824e-06
		1282.5	1.17071e-06
		1284	1.1936e-06
		1285.5	1.21692e-06
		1287	1.24067e-06
		1288.5	1.26486e-06
		1290	1.2895e-06
		1291.5	1.3146e-06
		1293	1.34016e-06
		1294.5	1.3662e-06
		1296	1.39271e-06
		1297.5	1.41972e-06
		1299	1.44722e-06
		1300.5	1.47523e-06
		1302	1.50376e-06
		1303.5	1.5328e-06
		1305	1.56238e-06
		1306.5	1.5925e-06
		1308	1.62317e-06
		1309.5	1.65441e-06
		1311	1.6862e-06
		1312.5	1.71858e-06
		1314	1.75155e-06
		1315.5	1.78511e-06
		1317	1.81928e-06
		1318.5	1.85407e-06
		1320	1.88948e-06
		1321.5	1.92554e-06
		1323	1.96224e-06
		1324.5	1.9996e-06
		1326	2.03763e-06
		1327.5	2.07634e-06
		1329	2.11574e-06
		1330.5	2.15585e-06
		1332	2.19666e-06
		1333.5	2.23821e-06
		1335	2.28049e-06
		1336.5	2.32351e-06
		1338	2.3673e-06
		1339.5	2.41186e-06
		1341	2.45721e-06
		1342.5	2.50335e-06
		1344	2.5503e-06
		1345.5	2.59808e-06
		1347	2.64668e-06
		1348.5	2.69614e-06
		1350	2.74645e-06
		1351.5	2.79764e-06
		1353	2.84972e-06
		1354.5	2.9027e-06
		1356	2.95659e-06
		1357.5	3.01141e-06
		1359	3.06717e-06
		1360.5	3.12389e-06
		1362	3.18157e-06
		1363.5	3.24025e-06
		1365	3.29992e-06
		1366.5	3.36061e-06
		1368	3.42232e-06
		1369.5	3.48508e-06
		1371	3.5489e-06
		1372.5	3.6138e-06
		1374	3.67978e-06
		1375.5	3.74688e-06
		1377	3.81509e-06
		1378.5	3.88444e-06
		1380	3.95495e-06
		1381.5	4.02662e-06
		1383	4.09949e-06
		1384.5	4.17356e-06
		1386	4.24884e-06
		1387.5	4.32537e-06
		1389	4.40315e-06
		1390.5	4.4822e-06
		1392	4.56254e-06
		1393.5	4.64419e-06
		1395	4.72716e-06
		1396.5	4.81148e-06
		1398	4.89715e-06
		1399.5	4.98421e-06
		1401	5.07266e-06
		1402.5	5.16252e-06
		1404	5.25382e-06
		1405.5	5.34658e-06
		1407	5.4408e-06
		1408.5	5.53652e-06
		1410	5.63374e-06
		1411.5	5.73249e-06
		1413	5.83279e-06
		1414.5	5.93466e-06
		1416	6.03812e-06
		1417.5	6.14319e-06
		1419	6.24988e-06
		1420.5	6.35822e-06
		1422	6.46822e-06
		1423.5	6.57992e-06
		1425	6.69332e-06
		1426.5	6.80845e-06
		1428	6.92534e-06
		1429.5	7.04399e-06
		1431	7.16443e-06
		1432.5	7.28669e-06
		1434	7.41078e-06
		1435.5	7.53672e-06
		1437	7.66454e-06
		1438.5	7.79425e-06
		1440	7.92589e-06
		1441.5	8.05946e-06
		1443	8.195e-06
		1444.5	8.33251e-06
		1446	8.47204e-06
		1447.5	8.61359e-06
		1449	8.75719e-06
		1450.5	8.90286e-06
		1452	9.05062e-06
		1453.5	9.2005e-06
		1455	9.35251e-06
		1456.5	9.50669e-06
		1458	9.66304e-06
		1459.5	9.8216e-06
		1461	9.98238e-06
		1462.5	1.01454e-05
		1464	1.03107e-05
		1465.5	1.04783e-05
		1467	1.06482e-05
		1468.5	1.08205e-05
		1470	1.09951e-05
		1471.5	1.11721e-05
		1473	1.13515e-05
		1474.5	1.15333e-05
		1476	1.17176e-05
		1477.5	1.19043e-05
		1479	1.20935e-05
		1480.5	1.22853e-05
		1482	1.24796e-05
		1483.5	1.26764e-05
		1485	1.28759e-05
		1486.5	1.30779e-05
		1488	1.32825e-05
		1489.5	1.34899e-05
		1491	1.36998e-05
		1492.5	1.39125e-05
		1494	1.41279e-05
		1495.5	1.4346e-05
		1497	1.45669e-05
		1498.5	1.47905e-05
		1500	1.5017e-05
		1501.5	1.52462e-05
		1503	1.54783e-05
		1504.5	1.57133e-05
		1506	1.59511e-05
		1507.5	1.61919e-05
		1509	1.64356e-05
		1510.5	1.66822e-05
		1512	1.69317e-05
		1513.5	1.71843e-05
		1515	1.74398e-05
		1516.5	1.76984e-05
		1518	1.796e-05
		1519.5	1.82247e-05
		1521	1.84924e-05
		1522.5	1.87632e-05
		1524	1.90372e-05
		1525.5	1.93143e-05
		1527	1.95945e-05
		1528.5	1.98779e-05
		1530	2.01644e-05
		1531.5	2.04542e-05
		1533	2.07472e-05
		1534.5	2.10434e-05
		1536	2.13428e-05
		1537.5	2.16455e-05
		1539	2.19515e-05
		1540.5	2.22608e-05
		1542	2.25733e-05
		1543.5	2.28892e-05
		1545	2.32084e-05
		1546.5	2.3531e-05
		1548	2.38569e-05
		1549.5	2.41862e-05
		1551	2.45189e-05
		1552.5	2.4855e-05
		1554	2.51944e-05
		1555.5	2.55373e-05
		1557	2.58836e-05
		1558.5	2.62334e-05
		1560	2.65865e-05
		1561.5	2.69432e-05
		1563	2.73033e-05
		1564.5	2.76668e-05
		1566	2.80339e-05
		1567.5	2.84044e-05
		1569	2.87784e-05
		1570.5	2.91559e-05
		1572	2.95368e-05
		1573.5	2.99213e-05
		1575	3.03093e-05
		1576.5	3.07008e-05
		1578	3.10958e-05
		1579.5	3.14944e-05
		1581	3.18964e-05
		1582.5	3.2302e-05
		1584	3.27111e-05
		1585.5	3.31237e-05
		1587	3.35398e-05
		1588.5	3.39594e-05
		1590	3.43825e-05
		1591.5	3.48092e-05
		1593	3.52393e-05
		1594.5	3.56729e-05
		1596	3.61101e-05
		1597.5	3.65507e-05
		1599	3.69948e-05
		1600.5	3.74424e-05
		1602	3.78935e-05
		1603.5	3.8348e-05
		1605	3.8806e-05
		1606.5	3.92674e-05
		1608	3.97322e-05
		1609.5	4.02005e-05
		1611	4.06721e-05
		1612.5	4.11472e-05
		1614	4.16256e-05
		1615.5	4.21074e-05
		1617	4.25926e-05
		1618.5	4.30811e-05
		1620	4.35729e-05
		1621.5	4.4068e-05
		1623	4.45664e-05
		1624.5	4.5068e-05
		1626	4.55729e-05
		1627.5	4.6081e-05
		1629	4.65923e-05
		1630.5	4.71068e-05
		1632	4.76245e-05
		1633.5	4.81452e-05
		1635	4.86691e-05
		1636.5	4.9196e-05
		1638	4.9726e-05
		1639.5	5.02591e-05
		1641	5.07951e-05
		1642.5	5.13341e-05
		1644	5.1876e-05
		1645.5	5.24208e-05
		1647	5.29685e-05
		1648.5	5.35191e-05
		1650	5.40724e-05
		1651.5	5.46285e-05
		1653	5.51874e-05
		1654.5	5.57489e-05
		1656	5.63132e-05
		1657.5	5.688e-05
		1659	5.74494e-05
		1660.5	5.80214e-05
		1662	5.85959e-05
		1663.5	5.91729e-05
		1665	5.97522e-05
		1666.5	6.0334e-05
		1668	6.09181e-05
		1669.5	6.15045e-05
		1671	6.20931e-05
		1672.5	6.2684e-05
		1674	6.3277e-05
		1675.5	6.38721e-05
		1677	6.44693e-05
		1678.5	6.50684e-05
		1680	6.56696e-05
		1681.5	6.62726e-05
		1683	6.68775e-05
		1684.5	6.74842e-05
		1686	6.80926e-05
		1687.5	6.87027e-05
		1689	6.93145e-05
		1690.5	6.99278e-05
		1692	7.05427e-05
		1693.5	7.11591e-05
		1695	7.17768e-05
		1696.5	7.23959e-05
		1698	7.30163e-05
		1699.5	7.36379e-05
		1701	7.42607e-05
		1702.5	7.48846e-05
		1704	7.55095e-05
		1705.5	7.61355e-05
		1707	7.67623e-05
		1708.5	7.739e-05
		1710	7.80185e-05
		1711.5	7.86477e-05
		1713	7.92775e-05
		1714.5	7.9908e-05
		1716	8.05389e-05
		1717.5	8.11703e-05
		1719	8.18021e-05
		1720.5	8.24342e-05
		1722	8.30666e-05
		1723.5	8.36991e-05
		1725	8.43317e-05
		1726.5	8.49644e-05
		1728	8.5597e-05
		1729.5	8.62295e-05
		1731	8.68618e-05
		1732.5	8.74938e-05
		1734	8.81255e-05
		1735.5	8.87568e-05
		1737	8.93876e-05
		1738.5	9.00178e-05
		1740	9.06474e-05
		1741.5	9.12763e-05
		1743	9.19044e-05
		1744.5	9.25316e-05
		1746	9.31579e-05
		1747.5	9.37831e-05
		1749	9.44073e-05
		1750.5	9.50303e-05
		1752	9.5652e-05
		1753.5	9.62724e-05
		1755	9.68914e-05
		1756.5	9.75089e-05
		1758	9.81248e-05
		1759.5	9.8739e-05
		1761	9.93516e-05
		1762.5	9.99623e-05
		1764	0.000100571
		1765.5	0.000101178
		1767	0.000101783
		1768.5	0.000102386
		1770	0.000102986
		1771.5	0.000103584
		1773	0.00010418
		1774.5	0.000104773
		1776	0.000105364
		1777.5	0.000105953
		1779	0.000106538
		1780.5	0.000107121
		1782	0.000107701
		1783.5	0.000108278
		1785	0.000108852
		1786.5	0.000109423
		1788	0.000109991
		1789.5	0.000110556
		1791	0.000111117
		1792.5	0.000111675
		1794	0.000112229
		1795.5	0.00011278
		1797	0.000113327
		1798.5	0.000113871
		1800	0.000114411
		1801.5	0.000114947
		1803	0.000115479
		1804.5	0.000116007
		1806	0.000116531
		1807.5	0.00011705
		1809	0.000117566
		1810.5	0.000118077
		1812	0.000118584
		1813.5	0.000119087
		1815	0.000119585
		1816.5	0.000120078
		1818	0.000120567
		1819.5	0.000121051
		1821	0.000121531
		1822.5	0.000122005
		1824	0.000122475
		1825.5	0.000122939
		1827	0.000123399
		1828.5	0.000123853
		1830	0.000124302
		1831.5	0.000124746
		1833	0.000125185
		1834.5	0.000125619
		1836	0.000126047
		1837.5	0.000126469
		1839	0.000126886
		1840.5	0.000127297
		1842	0.000127703
		1843.5	0.000128103
		1845	0.000128497
		1846.5	0.000128886
		1848	0.000129268
		1849.5	0.000129645
		1851	0.000130015
		1852.5	0.00013038
		1854	0.000130738
		1855.5	0.000131091
		1857	0.000131437
		1858.5	0.000131777
		1860	0.000132111
		1861.5	0.000132438
		1863	0.00013276
		1864.5	0.000133074
		1866	0.000133383
		1867.5	0.000133684
		1869	0.00013398
		1870.5	0.000134269
		1872	0.000134551
		1873.5	0.000134826
		1875	0.000135095
		1876.5	0.000135358
		1878	0.000135613
		1879.5	0.000135862
		1881	0.000136104
		1882.5	0.00013634
		1884	0.000136568
		1885.5	0.00013679
		1887	0.000137004
		1888.5	0.000137212
		1890	0.000137413
		1891.5	0.000137607
		1893	0.000137794
		1894.5	0.000137974
		1896	0.000138147
		1897.5	0.000138314
		1899	0.000138473
		1900.5	0.000138625
		1902	0.00013877
		1903.5	0.000138908
		1905	0.000139039
		1906.5	0.000139162
		1908	0.000139279
		1909.5	0.000139389
		1911	0.000139492
		1912.5	0.000139587
		1914	0.000139676
		1915.5	0.000139757
		1917	0.000139831
		1918.5	0.000139899
		1920	0.000139959
		1921.5	0.000140012
		1923	0.000140058
		1924.5	0.000140097
		1926	0.000140129
		1927.5	0.000140154
		1929	0.000140172
		1930.5	0.000140182
		1932	0.000140186
		1933.5	0.000140183
		1935	0.000140173
		1936.5	0.000140156
		1938	0.000140132
		1939.5	0.000140101
		1941	0.000140063
		1942.5	0.000140019
		1944	0.000139967
		1945.5	0.000139909
		1947	0.000139844
		1948.5	0.000139772
		1950	0.000139694
		1951.5	0.000139608
		1953	0.000139516
		1954.5	0.000139418
		1956	0.000139313
		1957.5	0.000139201
		1959	0.000139082
		1960.5	0.000138957
		1962	0.000138826
		1963.5	0.000138688
		1965	0.000138544
		1966.5	0.000138394
		1968	0.000138237
		1969.5	0.000138073
		1971	0.000137904
		1972.5	0.000137728
		1974	0.000137547
		1975.5	0.000137359
		1977	0.000137165
		1978.5	0.000136965
		1980	0.000136759
		1981.5	0.000136547
		1983	0.000136329
		1984.5	0.000136106
		1986	0.000135876
		1987.5	0.000135641
		1989	0.000135401
		1990.5	0.000135154
		1992	0.000134902
		1993.5	0.000134645
		1995	0.000134382
		1996.5	0.000134114
		1998	0.00013384
		1999.5	0.000133561
		2001	0.000133277
		2002.5	0.000132987
		2004	0.000132693
		2005.5	0.000132393
		2007	0.000132089
		2008.5	0.000131779
		2010	0.000131465
		2011.5	0.000131146
		2013	0.000130822
		2014.5	0.000130493
		2016	0.00013016
		2017.5	0.000129822
		2019	0.00012948
		2020.5	0.000129133
		2022	0.000128781
		2023.5	0.000128426
		2025	0.000128066
		2026.5	0.000127702
		2028	0.000127334
		2029.5	0.000126962
		2031	0.000126585
		2032.5	0.000126205
		2034	0.000125821
		2035.5	0.000125433
		2037	0.000125042
		2038.5	0.000124646
		2040	0.000124247
		2041.5	0.000123845
		2043	0.000123439
		2044.5	0.00012303
		2046	0.000122617
		2047.5	0.000122201
		2049	0.000121782
		2050.5	0.000121359
		2052	0.000120934
		2053.5	0.000120506
		2055	0.000120074
		2056.5	0.00011964
		2058	0.000119203
		2059.5	0.000118763
		2061	0.00011832
		2062.5	0.000117875
		2064	0.000117427
		2065.5	0.000116977
		2067	0.000116524
		2068.5	0.000116069
		2070	0.000115612
		2071.5	0.000115152
		2073	0.00011469
		2074.5	0.000114226
		2076	0.00011376
		2077.5	0.000113293
		2079	0.000112823
		2080.5	0.000112351
		2082	0.000111877
		2083.5	0.000111402
		2085	0.000110925
		2086.5	0.000110447
		2088	0.000109966
		2089.5	0.000109485
		2091	0.000109002
		2092.5	0.000108517
		2094	0.000108032
		2095.5	0.000107545
		2097	0.000107056
		2098.5	0.000106567
		2100	0.000106077
		2101.5	0.000105585
		2103	0.000105093
		2104.5	0.0001046
		2106	0.000104105
		2107.5	0.00010361
		2109	0.000103115
		2110.5	0.000102618
		2112	0.000102121
		2113.5	0.000101623
		2115	0.000101125
		2116.5	0.000100627
		2118	0.000100128
		2119.5	9.96281e-05
		2121	9.91282e-05
		2122.5	9.86281e-05
		2124	9.81278e-05
		2125.5	9.76273e-05
		2127	9.71267e-05
		2128.5	9.66259e-05
		2130	9.61252e-05
		2131.5	9.56244e-05
		2133	9.51237e-05
		2134.5	9.4623e-05
		2136	9.41226e-05
		2137.5	9.36223e-05
		2139	9.31222e-05
		2140.5	9.26224e-05
		2142	9.21229e-05
		2143.5	9.16238e-05
		2145	9.1125e-05
		2146.5	9.06267e-05
		2148	9.01289e-05
		2149.5	8.96316e-05
		2151	8.91348e-05
		2152.5	8.86387e-05
		2154	8.81431e-05
		2155.5	8.76483e-05
		2157	8.71541e-05
		2158.5	8.66606e-05
		2160	8.61679e-05
		2161.5	8.56761e-05
		2163	8.5185e-05
		2164.5	8.46949e-05
		2166	8.42056e-05
		2167.5	8.37173e-05
		2169	8.32299e-05
		2170.5	8.27435e-05
		2172	8.22582e-05
		2173.5	8.17739e-05
		2175	8.12907e-05
		2176.5	8.08086e-05
		2178	8.03276e-05
		2179.5	7.98478e-05
		2181	7.93692e-05
		2182.5	7.88918e-05
		2184	7.84156e-05
		2185.5	7.79407e-05
		2187	7.74671e-05
		2188.5	7.69948e-05
		2190	7.65239e-05
		2191.5	7.60543e-05
		2193	7.55861e-05
		2194.5	7.51193e-05
		2196	7.46539e-05
		2197.5	7.41899e-05
		2199	7.37274e-05
		2200.5	7.32664e-05
		2202	7.28069e-05
		2203.5	7.23488e-05
		2205	7.18924e-05
		2206.5	7.14374e-05
		2208	7.09841e-05
		2209.5	7.05323e-05
		2211	7.00821e-05
		2212.5	6.96335e-05
		2214	6.91866e-05
		2215.5	6.87413e-05
		2217	6.82976e-05
		2218.5	6.78556e-05
		2220	6.74153e-05
		2221.5	6.69766e-05
		2223	6.65397e-05
		2224.5	6.61045e-05
		2226	6.5671e-05
		2227.5	6.52392e-05
		2229	6.48092e-05
		2230.5	6.43809e-05
		2232	6.39544e-05
		2233.5	6.35296e-05
		2235	6.31066e-05
		2236.5	6.26854e-05
		2238	6.2266e-05
		2239.5	6.18484e-05
		2241	6.14326e-05
		2242.5	6.10186e-05
		2244	6.06065e-05
		2245.5	6.01961e-05
		2247	5.97876e-05
		2248.5	5.93809e-05
		2250	5.8976e-05
		2251.5	5.8573e-05
		2253	5.81718e-05
		2254.5	5.77724e-05
		2256	5.73749e-05
		2257.5	5.69793e-05
		2259	5.65855e-05
		2260.5	5.61936e-05
		2262	5.58035e-05
		2263.5	5.54153e-05
		2265	5.50289e-05
		2266.5	5.46444e-05
		2268	5.42618e-05
		2269.5	5.3881e-05
		2271	5.35021e-05
		2272.5	5.31251e-05
		2274	5.27499e-05
		2275.5	5.23766e-05
		2277	5.20051e-05
		2278.5	5.16355e-05
		2280	5.12677e-05
		2281.5	5.09019e-05
		2283	5.05378e-05
		2284.5	5.01756e-05
		2286	4.98153e-05
		2287.5	4.94568e-05
		2289	4.91002e-05
		2290.5	4.87454e-05
		2292	4.83925e-05
		2293.5	4.80414e-05
		2295	4.76921e-05
		2296.5	4.73447e-05
		2298	4.69991e-05
		2299.5	4.66553e-05
		2301	4.63133e-05
		2302.5	4.59732e-05
		2304	4.56349e-05
		2305.5	4.52983e-05
		2307	4.49636e-05
		2308.5	4.46307e-05
		2310	4.42996e-05
		2311.5	4.39703e-05
		2313	4.36428e-05
		2314.5	4.3317e-05
		2316	4.2993e-05
		2317.5	4.26709e-05
		2319	4.23504e-05
		2320.5	4.20318e-05
		2322	4.17149e-05
		2323.5	4.13997e-05
		2325	4.10863e-05
		2326.5	4.07746e-05
		2328	4.04647e-05
		2329.5	4.01565e-05
		2331	3.985e-05
		2332.5	3.95453e-05
		2334	3.92423e-05
		2335.5	3.89409e-05
		2337	3.86413e-05
		2338.5	3.83434e-05
		2340	3.80471e-05
		2341.5	3.77526e-05
		2343	3.74597e-05
		2344.5	3.71685e-05
		2346	3.6879e-05
		2347.5	3.65911e-05
		2349	3.63049e-05
		2350.5	3.60203e-05
		2352	3.57374e-05
		2353.5	3.54561e-05
		2355	3.51764e-05
		2356.5	3.48984e-05
		2358	3.4622e-05
		2359.5	3.43472e-05
		2361	3.4074e-05
		2362.5	3.38024e-05
		2364	3.35324e-05
		2365.5	3.32639e-05
		2367	3.29971e-05
		2368.5	3.27318e-05
		2370	3.24681e-05
		2371.5	3.2206e-05
		2373	3.19454e-05
		2374.5	3.16864e-05
		2376	3.14289e-05
		2377.5	3.11729e-05
		2379	3.09185e-05
		2380.5	3.06656e-05
		2382	3.04142e-05
		2383.5	3.01644e-05
		2385	2.9916e-05
		2386.5	2.96692e-05
		2388	2.94238e-05
		2389.5	2.91799e-05
		2391	2.89375e-05
		2392.5	2.86966e-05
		2394	2.84572e-05
		2395.5	2.82192e-05
		2397	2.79827e-05
		2398.5	2.77476e-05
		2400	2.7514e-05
		2401.5	2.72818e-05
		2403	2.7051e-05
		2404.5	2.68217e-05
		2406	2.65938e-05
		2407.5	2.63674e-05
		2409	2.61423e-05
		2410.5	2.59186e-05
		2412	2.56964e-05
		2413.5	2.54755e-05
		2415	2.5256e-05
		2416.5	2.50379e-05
		2418	2.48212e-05
		2419.5	2.46059e-05
		2421	2.43919e-05
		2422.5	2.41793e-05
		2424	2.3968e-05
		2425.5	2.37581e-05
		2427	2.35495e-05
		2428.5	2.33423e-05
		2430	2.31364e-05
		2431.5	2.29319e-05
		2433	2.27286e-05
		2434.5	2.25267e-05
		2436	2.23261e-05
		2437.5	2.21268e-05
		2439	2.19288e-05
		2440.5	2.17321e-05
		2442	2.15367e-05
		2443.5	2.13426e-05
		2445	2.11497e-05
		2446.5	2.09581e-05
		2448	2.07679e-05
		2449.5	2.05788e-05
		2451	2.03911e-05
		2452.5	2.02045e-05
		2454	2.00193e-05
		2455.5	1.98353e-05
		2457	1.96525e-05
		2458.5	1.9471e-05
		2460	1.92907e-05
		2461.5	1.91116e-05
		2463	1.89337e-05
		2464.5	1.87571e-05
		2466	1.85817e-05
		2467.5	1.84074e-05
		2469	1.82344e-05
		2470.5	1.80626e-05
		2472	1.7892e-05
		2473.5	1.77225e-05
		2475	1.75543e-05
		2476.5	1.73872e-05
		2478	1.72213e-05
		2479.5	1.70565e-05
		2481	1.68929e-05
		2482.5	1.67305e-05
		2484	1.65693e-05
		2485.5	1.64092e-05
		2487	1.62502e-05
		2488.5	1.60924e-05
		2490	1.59357e-05
		2491.5	1.57801e-05
		2493	1.56257e-05
		2494.5	1.54724e-05
		2496	1.53202e-05
		2497.5	1.51691e-05
		2499	1.50191e-05
		2500.5	1.48703e-05
		2502	1.47225e-05
		2503.5	1.45758e-05
		2505	1.44302e-05
		2506.5	1.42857e-05
		2508	1.41423e-05
		2509.5	1.4e-05
		2511	1.38587e-05
		2512.5	1.37185e-05
		2514	1.35794e-05
		2515.5	1.34413e-05
		2517	1.33043e-05
		2518.5	1.31683e-05
		2520	1.30334e-05
		2521.5	1.28995e-05
		2523	1.27666e-05
		2524.5	1.26348e-05
		2526	1.2504e-05
		2527.5	1.23742e-05
		2529	1.22454e-05
		2530.5	1.21177e-05
		2532	1.1991e-05
		2533.5	1.18652e-05
		2535	1.17405e-05
		2536.5	1.16167e-05
		2538	1.1494e-05
		2539.5	1.13722e-05
		2541	1.12514e-05
		2542.5	1.11316e-05
		2544	1.10128e-05
		2545.5	1.08949e-05
		2547	1.0778e-05
		2548.5	1.06621e-05
		2550	1.05471e-05
		2551.5	1.0433e-05
		2553	1.03199e-05
		2554.5	1.02078e-05
		2556	1.00966e-05
		2557.5	9.98627e-06
		2559	9.87691e-06
		2560.5	9.76846e-06
		2562	9.66094e-06
		2563.5	9.55433e-06
		2565	9.44862e-06
		2566.5	9.34382e-06
		2568	9.23992e-06
		2569.5	9.13691e-06
		2571	9.03479e-06
		2572.5	8.93356e-06
		2574	8.83321e-06
		2575.5	8.73374e-06
		2577	8.63513e-06
		2578.5	8.53739e-06
		2580	8.44052e-06
		2581.5	8.3445e-06
		2583	8.24934e-06
		2584.5	8.15502e-06
		2586	8.06155e-06
		2587.5	7.96892e-06
		2589	7.87712e-06
		2590.5	7.78615e-06
		2592	7.69601e-06
		2593.5	7.60669e-06
		2595	7.51818e-06
		2596.5	7.43049e-06
		2598	7.3436e-06
		2599.5	7.25751e-06
		2601	7.17222e-06
		2602.5	7.08773e-06
		2604	7.00402e-06
		2605.5	6.92109e-06
		2607	6.83895e-06
		2608.5	6.75758e-06
		2610	6.63715e-06
		2611.5	6.55858e-06
		2613	6.48073e-06
		2614.5	6.4036e-06
		2616	6.32719e-06
		2617.5	6.25149e-06
		2619	6.1765e-06
		2620.5	6.10221e-06
		2622	6.02862e-06
		2623.5	5.95572e-06
		2625	5.88352e-06
		2626.5	5.81201e-06
		2628	5.74119e-06
		2629.5	5.67104e-06
		2631	5.60157e-06
		2632.5	5.53278e-06
		2634	5.46466e-06
		2635.5	5.3972e-06
		2637	5.3304e-06
		2638.5	5.26426e-06
		2640	5.19878e-06
		2641.5	5.13394e-06
		2643	5.06975e-06
		2644.5	5.00621e-06
		2646	4.9433e-06
		2647.5	4.88102e-06
		2649	4.81938e-06
		2650.5	4.75836e-06
		2652	4.69796e-06
		2653.5	4.63818e-06
		2655	4.57902e-06
		2656.5	4.52046e-06
		2658	4.46251e-06
		2659.5	4.40517e-06
		2661	4.34842e-06
		2662.5	4.29226e-06
		2664	4.23669e-06
		2665.5	4.18171e-06
		2667	4.12731e-06
		2668.5	4.07349e-06
		2670	4.02023e-06
		2671.5	3.96755e-06
		2673	3.91544e-06
		2674.5	3.86388e-06
		2676	3.81288e-06
		2677.5	3.76243e-06
		2679	3.71253e-06
		2680.5	3.66318e-06
		2682	3.61437e-06
		2683.5	3.56609e-06
		2685	3.51834e-06
		2686.5	3.47112e-06
		2688	3.42443e-06
		2689.5	3.37826e-06
		2691	3.3326e-06
		2692.5	3.28745e-06
		2694	3.24281e-06
		2695.5	3.19867e-06
		2697	3.15504e-06
		2698.5	3.1119e-06
		2700	3.06925e-06
		2701.5	3.02709e-06
		2703	2.98541e-06
		2704.5	2.94421e-06
		2706	2.90349e-06
		2707.5	2.86324e-06
		2709	2.82345e-06
		2710.5	2.78413e-06
		2712	2.74527e-06
		2713.5	2.70686e-06
		2715	2.66891e-06
		2716.5	2.6314e-06
		2718	2.59434e-06
		2719.5	2.55772e-06
		2721	2.52153e-06
		2722.5	2.48578e-06
		2724	2.45046e-06
		2725.5	2.41555e-06
		2727	2.38107e-06
		2728.5	2.34701e-06
		2730	2.31336e-06
		2731.5	2.28012e-06
		2733	2.24729e-06
		2734.5	2.21485e-06
		2736	2.18282e-06
		2737.5	2.15118e-06
		2739	2.11993e-06
		2740.5	2.08906e-06
		2742	2.05858e-06
		2743.5	2.02848e-06
		2745	1.99876e-06
		2746.5	1.96941e-06
		2748	1.94042e-06
		2749.5	1.91181e-06
		2751	1.88355e-06
		2752.5	1.85565e-06
		2754	1.82811e-06
		2755.5	1.80092e-06
		2757	1.77407e-06
		2758.5	1.74757e-06
		2760	1.72141e-06
		2761.5	1.69559e-06
		2763	1.6701e-06
		2764.5	1.64494e-06
		2766	1.62011e-06
		2767.5	1.59561e-06
		2769	1.57142e-06
		2770.5	1.54755e-06
		2772	1.52399e-06
		2773.5	1.50075e-06
		2775	1.47781e-06
		2776.5	1.45517e-06
		2778	1.43284e-06
		2779.5	1.4108e-06
		2781	1.38906e-06
		2782.5	1.36761e-06
		2784	1.34644e-06
		2785.5	1.32557e-06
		2787	1.30497e-06
		2788.5	1.28465e-06
		2790	1.26461e-06
		2791.5	1.24484e-06
		2793	1.22534e-06
		2794.5	1.20611e-06
		2796	1.18714e-06
		2797.5	1.16844e-06
		2799	1.14999e-06
		2800.5	1.13179e-06
		2802	1.11385e-06
		2803.5	1.09616e-06
		2805	1.07871e-06
		2806.5	1.06151e-06
		2808	1.04455e-06
		2809.5	1.02782e-06
		2811	1.01133e-06
		2812.5	9.95077e-07
		2814	9.79051e-07
		2815.5	9.63252e-07
		2817	9.47678e-07
		2818.5	9.32325e-07
		2820	9.17192e-07
		2821.5	9.02276e-07
		2823	8.87573e-07
		2824.5	8.73083e-07
		2826	8.58801e-07
		2827.5	8.44726e-07
		2829	8.30855e-07
		2830.5	8.17185e-07
		2832	8.03715e-07
		2833.5	7.90441e-07
		2835	7.77362e-07
		2836.5	7.64474e-07
		2838	7.51776e-07
		2839.5	7.39265e-07
		2841	7.2694e-07
		2842.5	7.14796e-07
		2844	7.02833e-07
		2845.5	6.91049e-07
		2847	6.7944e-07
		2848.5	6.68004e-07
		2850	6.5674e-07
		2851.5	6.45645e-07
		2853	6.34718e-07
		2854.5	6.23955e-07
		2856	6.13355e-07
		2857.5	6.02916e-07
		2859	5.92635e-07
		2860.5	5.82511e-07
		2862	5.72542e-07
		2863.5	5.62725e-07
		2865	5.53059e-07
		2866.5	5.43542e-07
		2868	5.34171e-07
		2869.5	5.24945e-07
		2871	5.15861e-07
		2872.5	5.06919e-07
		2874	4.98116e-07
		2875.5	4.89449e-07
		2877	4.80919e-07
		2878.5	4.72521e-07
		2880	4.64256e-07
		2881.5	4.5612e-07
		2883	4.48113e-07
		2884.5	4.40232e-07
		2886	4.32476e-07
		2887.5	4.24843e-07
		2889	4.17331e-07
		2890.5	4.09939e-07
		2892	4.02665e-07
		2893.5	3.95507e-07
		2895	3.88464e-07
		2896.5	3.81534e-07
		2898	3.74716e-07
		2899.5	3.68008e-07
		2901	3.61408e-07
		2902.5	3.54916e-07
		2904	3.48529e-07
		2905.5	3.42245e-07
		2907	3.36065e-07
		2908.5	3.29985e-07
		2910	3.24005e-07
		2911.5	3.18123e-07
		2913	3.12338e-07
		2914.5	3.06648e-07
		2916	3.01052e-07
		2917.5	2.95549e-07
		2919	2.90137e-07
		2920.5	2.84816e-07
		2922	2.79582e-07
		2923.5	2.74437e-07
		2925	2.69377e-07
		2926.5	2.64402e-07
		2928	2.5951e-07
		2929.5	2.54701e-07
		2931	2.49973e-07
		2932.5	2.45325e-07
		2934	2.40756e-07
		2935.5	2.36264e-07
		2937	2.31849e-07
		2938.5	2.27508e-07
		2940	2.23242e-07
		2941.5	2.19049e-07
		2943	2.14928e-07
		2944.5	2.10877e-07
		2946	2.06896e-07
		2947.5	2.02984e-07
		2949	1.9914e-07
		2950.5	1.95362e-07
		2952	1.91649e-07
		2953.5	1.88001e-07
		2955	1.84417e-07
		2956.5	1.80895e-07
		2958	1.77434e-07
		2959.5	1.74035e-07
		2961	1.70695e-07
		2962.5	1.67413e-07
		2964	1.6419e-07
		2965.5	1.61023e-07
		2967	1.57913e-07
		2968.5	1.54857e-07
		2970	1.51856e-07
		2971.5	1.48908e-07
		2973	1.46013e-07
		2974.5	1.43169e-07
		2976	1.40377e-07
		2977.5	1.37634e-07
		2979	1.3494e-07
		2980.5	1.32296e-07
		2982	1.29698e-07
		2983.5	1.27148e-07
		2985	1.24644e-07
		2986.5	1.22185e-07
		2988	1.19771e-07
		2989.5	1.17401e-07
		2991	1.15074e-07
		2992.5	1.12789e-07
		2994	1.10547e-07
		2995.5	1.08345e-07
		2997	1.06184e-07
		2998.5	1.04063e-07
[truncated: 1 more rows]

## Sheet: PlotDat11
Source sheet	entregar - entregar	400	0	463	0	400	0
Plot name	ProbDens0	400.225	4.05039e-08	472	0	849.775	0
Plot Type	16	400.45	4.14122e-08	472	4
1st free col	9	400.675	4.23396e-08	463	4
Sigma Level	2	400.9	4.32867e-08	463	0
Absolute Errs	FALSE	401.125	4.42537e-08	ErrBox	ErrBox
Symbol Type	1	401.35	4.52411e-08	472	0
Inverse Plot	FALSE	401.575	4.62493e-08	481	0
Color Plot	TRUE	401.8	4.72787e-08	481	12
3D plot	FALSE	402.025	4.83297e-08	472	12
Linear	FALSE	402.25	4.94027e-08	472	0
Data Range	CL72:CM96	402.475	5.04982e-08	ErrBox	ErrBox
Filled Symbols	FALSE	402.7	5.16166e-08	481	0
ConcAge	FALSE	402.925	5.27584e-08	490	0
ConcSwap	FALSE	403.15	5.39239e-08	490	3
1st Symbol-row	1	403.375	5.51137e-08	481	3
		403.6	5.63282e-08	481	0
		403.825	5.75679e-08	ErrBox	ErrBox
		404.05	5.88334e-08	490	0
		404.275	6.0125e-08	499	0
		404.5	6.14433e-08	499	2
		404.725	6.27888e-08	490	2
		404.95	6.41621e-08	490	0
		405.175	6.55636e-08	ErrBox	ErrBox
		405.4	6.6994e-08	562	0
		405.625	6.84536e-08	571	0
		405.85	6.99432e-08	571	1
		406.075	7.14633e-08	562	1
		406.3	7.30145e-08	562	0
		406.525	7.45973e-08	ErrBox	ErrBox
		406.75	7.62123e-08	580	0
		406.975	1.20571e-07	589	0
		407.2	1.25243e-07	589	2
		407.425	1.30147e-07	580	2
		407.65	1.35297e-07	580	0
		407.875	1.40706e-07	ErrBox	ErrBox
		408.1	1.46388e-07	742	0
		408.325	1.52359e-07	751	0
		408.55	1.58636e-07	751	1
		408.775	1.65234e-07	742	1
		409	1.72172e-07	742	0
		409.225	1.79468e-07	ErrBox	ErrBox
		409.45	1.87144e-07
		409.675	1.95219e-07
		409.9	2.03715e-07
		410.125	2.12657e-07
		410.35	2.22068e-07
		410.575	2.31974e-07
		410.8	2.42403e-07
		411.025	2.53383e-07
		411.25	2.64944e-07
		411.475	2.77119e-07
		411.7	2.89939e-07
		411.925	3.0344e-07
		412.15	3.1766e-07
		412.375	3.32636e-07
		412.6	3.48409e-07
		412.825	4.05904e-07
		413.05	4.26467e-07
		413.275	4.4818e-07
		413.5	4.71106e-07
		413.725	4.95312e-07
		413.95	5.61158e-07
		414.175	5.91664e-07
		414.4	6.23965e-07
		414.625	6.58168e-07
		414.85	6.94381e-07
		415.075	7.32722e-07
		415.3	7.73315e-07
		415.525	8.16288e-07
		415.75	8.6178e-07
		415.975	9.09934e-07
		416.2	9.60902e-07
		416.425	1.01485e-06
		416.65	1.07193e-06
		416.875	1.17468e-06
		417.1	1.24218e-06
		417.325	1.31368e-06
		417.55	1.38939e-06
		417.775	1.51003e-06
		418	1.5988e-06
		418.225	1.6929e-06
		418.45	1.79265e-06
		418.675	1.89838e-06
		418.9	2.01043e-06
		419.125	2.16942e-06
		419.35	2.29863e-06
		419.575	2.47812e-06
		419.8	2.62679e-06
		420.025	2.78441e-06
		420.25	2.9515e-06
		420.475	3.12862e-06
		420.7	3.31633e-06
		420.925	3.51524e-06
		421.15	3.72601e-06
		421.375	3.94931e-06
		421.6	4.18585e-06
		421.825	4.43637e-06
		422.05	4.74327e-06
		422.275	5.02766e-06
		422.5	5.37144e-06
		422.725	5.69464e-06
		422.95	6.03695e-06
		423.175	6.44147e-06
		423.4	6.87114e-06
		423.625	7.2846e-06
		423.85	7.72238e-06
		424.075	8.18585e-06
		424.3	8.67644e-06
		424.525	9.19566e-06
		424.75	9.74509e-06
		424.975	1.03264e-05
		425.2	1.09414e-05
		425.425	1.15918e-05
		425.65	1.22796e-05
		425.875	1.30471e-05
		426.1	1.38197e-05
		426.325	1.46365e-05
		426.55	1.54998e-05
		426.775	1.64122e-05
		427	1.73761e-05
		427.225	1.83944e-05
		427.45	1.94699e-05
		427.675	2.06481e-05
		427.9	2.18514e-05
		428.125	2.31217e-05
		428.35	2.44626e-05
		428.575	2.58777e-05
		428.8	2.73708e-05
		429.025	2.89459e-05
		429.25	3.06492e-05
		429.475	3.2447e-05
		429.7	3.43042e-05
		429.925	3.62624e-05
		430.15	3.83267e-05
		430.375	4.05025e-05
		430.6	4.27953e-05
		430.825	4.5211e-05
		431.05	4.77556e-05
		431.275	5.04355e-05
		431.5	5.32574e-05
		431.725	5.63118e-05
		431.95	5.9446e-05
		432.175	6.27444e-05
		432.4	6.62149e-05
		432.625	6.98657e-05
		432.85	7.37055e-05
		433.075	7.77431e-05
		433.3	8.19878e-05
		433.525	8.64494e-05
		433.75	9.11379e-05
		433.975	9.60638e-05
		434.2	0.000101238
		434.425	0.000106672
		434.65	0.000112377
		434.875	0.000118366
		435.1	0.000124652
		435.325	0.000131247
		435.55	0.000138166
		435.775	0.000145422
		436	0.00015303
		436.225	0.000161006
		436.45	0.000169366
		436.675	0.000178168
		436.9	0.000187349
		437.125	0.000196965
		437.35	0.000207034
		437.575	0.000217575
		437.8	0.000228648
		438.025	0.000240198
		438.25	0.000252281
		438.475	0.00026492
		438.7	0.000278178
		438.925	0.000292
		439.15	0.000306447
		439.375	0.000321544
		439.6	0.000337316
		439.825	0.000353789
		440.05	0.000370991
		440.275	0.000388948
		440.5	0.000407691
		440.725	0.000427248
		440.95	0.000447649
		441.175	0.000468927
		441.4	0.000491112
		441.625	0.000514237
		441.85	0.000538338
		442.075	0.000563447
		442.3	0.000589601
		442.525	0.000616837
		442.75	0.000645191
		442.975	0.000674702
		443.2	0.000705409
		443.425	0.000737352
		443.65	0.000770573
		443.875	0.000805112
		444.1	0.000841013
		444.325	0.00087832
		444.55	0.000917077
		444.775	0.000957328
		445	0.000999122
		445.225	0.0010425
		445.45	0.00108752
		445.675	0.00113423
		445.9	0.00118266
		446.125	0.00123289
		446.35	0.00128495
		446.575	0.00133889
		446.8	0.00139478
		447.025	0.00145266
		447.25	0.00151258
		447.475	0.0015746
		447.7	0.00163878
		447.925	0.00170517
		448.15	0.00177382
		448.375	0.0018448
		448.6	0.00191814
		448.825	0.00199393
		449.05	0.0020722
		449.275	0.00215301
		449.5	0.00223643
		449.725	0.0023225
		449.95	0.00241129
		450.175	0.00250284
		450.4	0.00259723
		450.625	0.00269449
		450.85	0.00279469
		451.075	0.00289787
		451.3	0.0030041
		451.525	0.00311343
		451.75	0.00322595
		451.975	0.00334162
		452.2	0.00346054
		452.425	0.00358276
		452.65	0.00370832
		452.875	0.00383727
		453.1	0.00396965
		453.325	0.0041055
		453.55	0.00424487
		453.775	0.00438779
		454	0.0045343
		454.225	0.00468442
		454.45	0.00483821
		454.675	0.00499567
		454.9	0.00515684
		455.125	0.00532173
		455.35	0.00549038
		455.575	0.0056628
		455.8	0.00583899
		456.025	0.00601898
		456.25	0.00620276
		456.475	0.00639034
		456.7	0.00658172
		456.925	0.00677689
		457.15	0.00697585
		457.375	0.00717857
		457.6	0.00738505
		457.825	0.00759526
		458.05	0.00780917
		458.275	0.00802675
		458.5	0.00824797
		458.725	0.00847277
		458.95	0.00870112
		459.175	0.00893297
		459.4	0.00916824
		459.625	0.00940689
		459.85	0.00964884
		460.075	0.00989401
		460.3	0.0101423
		460.525	0.0103937
		460.75	0.0106481
		460.975	0.0109053
		461.2	0.0111653
		461.425	0.011428
		461.65	0.0116932
		461.875	0.0119608
		462.1	0.0122307
		462.325	0.0125028
		462.55	0.0127769
		462.775	0.0130529
		463	0.0133307
		463.225	0.01361
		463.45	0.0138907
		463.675	0.0141727
		463.9	0.0144557
		464.125	0.0147397
		464.35	0.0150243
		464.575	0.0153095
		464.8	0.0155951
		465.025	0.0158807
		465.25	0.0161663
		465.475	0.0164517
		465.7	0.0167365
		465.925	0.0170207
		466.15	0.017304
		466.375	0.0175861
		466.6	0.0178669
		466.825	0.0181461
		467.05	0.0184235
		467.275	0.0186989
		467.5	0.018972
		467.725	0.0192426
		467.95	0.0195105
		468.175	0.0197755
		468.4	0.0200372
		468.625	0.0202955
		468.85	0.0205501
		469.075	0.0208009
		469.3	0.0210475
		469.525	0.0212897
		469.75	0.0215274
		469.975	0.0217602
		470.2	0.0219881
		470.425	0.0222106
		470.65	0.0224277
		470.875	0.0226392
		471.1	0.0228447
		471.325	0.0230442
		471.55	0.0232374
		471.775	0.0234242
		472	0.0236043
		472.225	0.0237776
		472.45	0.0239439
		472.675	0.0241031
		472.9	0.0242549
		473.125	0.0243993
		473.35	0.0245362
		473.575	0.0246653
		473.8	0.0247866
		474.025	0.0249
		474.25	0.0250053
		474.475	0.0251025
		474.7	0.0251915
		474.925	0.0252723
		475.15	0.0253446
		475.375	0.0254086
		475.6	0.0254642
		475.825	0.0255113
		476.05	0.02555
		476.275	0.0255801
		476.5	0.0256018
		476.725	0.025615
		476.95	0.0256198
		477.175	0.0256161
		477.4	0.0256041
		477.625	0.0255838
		477.85	0.0255552
		478.075	0.0255185
		478.3	0.0254736
		478.525	0.0254208
		478.75	0.02536
		478.975	0.0252915
		479.2	0.0252152
		479.425	0.0251315
		479.65	0.0250403
		479.875	0.0249418
		480.1	0.0248362
		480.325	0.0247236
		480.55	0.0246042
		480.775	0.0244782
		481	0.0243456
		481.225	0.0242068
		481.45	0.0240619
		481.675	0.023911
		481.9	0.0237543
		482.125	0.0235921
		482.35	0.0234246
		482.575	0.0232519
		482.8	0.0230742
		483.025	0.0228917
		483.25	0.0227046
		483.475	0.0225132
		483.7	0.0223177
		483.925	0.0221181
		484.15	0.0219148
		484.375	0.0217079
		484.6	0.0214977
		484.825	0.0212843
		485.05	0.0210679
		485.275	0.0208487
		485.5	0.020627
		485.725	0.0204028
		485.95	0.0201764
		486.175	0.019948
		486.4	0.0197177
		486.625	0.0194857
		486.85	0.0192522
		487.075	0.0190173
		487.3	0.0187813
		487.525	0.0185442
		487.75	0.0183062
		487.975	0.0180675
		488.2	0.0178282
		488.425	0.0175884
		488.65	0.0173484
		488.875	0.0171081
		489.1	0.0168678
		489.325	0.0166276
		489.55	0.0163875
		489.775	0.0161477
		490	0.0159083
		490.225	0.0156694
		490.45	0.0154312
		490.675	0.0151936
		490.9	0.0149568
		491.125	0.0147209
		491.35	0.0144859
		491.575	0.014252
		491.8	0.0140192
		492.025	0.0137875
		492.25	0.0135571
		492.475	0.0133281
		492.7	0.0131004
		492.925	0.0128741
		493.15	0.0126494
		493.375	0.0124262
		493.6	0.0122046
		493.825	0.0119846
		494.05	0.0117664
		494.275	0.0115498
		494.5	0.0113351
		494.725	0.0111222
		494.95	0.0109111
		495.175	0.0107019
		495.4	0.0104947
		495.625	0.0102894
		495.85	0.0100861
		496.075	0.00988483
		496.3	0.00968561
		496.525	0.00948847
		496.75	0.00929344
		496.975	0.00910053
		497.2	0.00890978
		497.425	0.0087212
		497.65	0.00853482
		497.875	0.00835066
		498.1	0.00816873
		498.325	0.00798906
		498.55	0.00781167
		498.775	0.00763656
		499	0.00746376
		499.225	0.00729328
		499.45	0.00712513
		499.675	0.00695933
		499.9	0.00679589
		500.125	0.00663482
		500.35	0.00647613
		500.575	0.00631983
		500.8	0.00616593
		501.025	0.00601443
		501.25	0.00586534
		501.475	0.00571866
		501.7	0.00557441
		501.925	0.00543258
		502.15	0.00529317
		502.375	0.00515618
		502.6	0.00502163
		502.825	0.00488949
		503.05	0.00475977
		503.275	0.00463248
		503.5	0.00450759
		503.725	0.00438511
		503.95	0.00426502
		504.175	0.00414733
		504.4	0.00403201
		504.625	0.00391907
		504.85	0.00380848
		505.075	0.00370024
		505.3	0.00359433
		505.525	0.00349073
		505.75	0.00338943
		505.975	0.00329041
		506.2	0.00319366
		506.425	0.00309914
		506.65	0.00300685
		506.875	0.00291676
		507.1	0.00282885
		507.325	0.00274309
		507.55	0.00265946
		507.775	0.00257793
		508	0.00249849
		508.225	0.00242109
		508.45	0.00234572
		508.675	0.00227234
		508.9	0.00220093
		509.125	0.00213146
		509.35	0.0020639
		509.575	0.00199825
		509.8	0.00193437
		510.025	0.00187235
		510.25	0.00181211
		510.475	0.00175361
		510.7	0.00169684
		510.925	0.00164175
		511.15	0.0015883
		511.375	0.00153648
		511.6	0.00148624
		511.825	0.00143755
		512.05	0.00139038
		512.275	0.00134469
		512.5	0.00130046
		512.725	0.00125764
		512.95	0.0012162
		513.175	0.00117612
		513.4	0.00113736
		513.625	0.00109988
		513.85	0.00106366
		514.075	0.00102865
		514.3	0.000994844
		514.525	0.000962192
		514.75	0.000930669
		514.975	0.000900243
		515.2	0.000870885
		515.425	0.000842529
		515.65	0.000815222
		515.875	0.000788894
		516.1	0.000763518
		516.325	0.000739029
		516.55	0.000715478
		516.775	0.000692796
		517	0.000670957
		517.225	0.000649937
		517.45	0.000629709
		517.675	0.00061025
		517.9	0.000591536
		518.125	0.000573543
		518.35	0.000556249
		518.575	0.000539631
		518.8	0.000523669
		519.025	0.000508341
		519.25	0.000493626
		519.475	0.000479505
		519.7	0.000465919
		519.925	0.000452932
		520.15	0.000440482
		520.375	0.000428552
		520.6	0.000417123
		520.825	0.000406181
		521.05	0.000395672
		521.275	0.000385657
		521.5	0.000376082
		521.725	0.00036693
		521.95	0.00035819
		522.175	0.000349847
		522.4	0.000341888
		522.625	0.0003343
		522.85	0.000327072
		523.075	0.000320191
		523.3	0.000313648
		523.525	0.00030743
		523.75	0.000301527
		523.975	0.000295931
		524.2	0.00029063
		524.425	0.000285616
		524.65	0.00028088
		524.875	0.000276414
		525.1	0.00027221
		525.325	0.000268221
		525.55	0.000264521
		525.775	0.00026106
		526	0.000257793
		526.225	0.000254796
		526.45	0.000252019
		526.675	0.000249458
		526.9	0.000247105
		527.125	0.000244957
		527.35	0.000243009
		527.575	0.000241256
		527.8	0.000239694
		528.025	0.00023832
		528.25	0.000237128
		528.475	0.000236081
		528.7	0.000235212
		528.925	0.000234558
		529.15	0.000234075
		529.375	0.00023376
		529.6	0.000233611
		529.825	0.000233627
		530.05	0.000233805
		530.275	0.000234143
		530.5	0.000234641
		530.725	0.000235298
		530.95	0.000236074
		531.175	0.000237009
		531.4	0.000238142
		531.625	0.000239429
		531.85	0.000240872
		532.075	0.000242469
		532.3	0.000244221
		532.525	0.000246129
		532.75	0.000248191
		532.975	0.00025041
		533.2	0.000252786
		533.425	0.000255319
		533.65	0.000258011
		533.875	0.000260863
		534.1	0.000263835
		534.325	0.000267013
		534.55	0.000270277
		534.775	0.000273789
		535	0.00027751
		535.225	0.00028136
		535.45	0.00028538
		535.675	0.000289572
		535.9	0.000293937
		536.125	0.00029844
		536.35	0.000303164
		536.575	0.000308067
		536.8	0.000313112
		537.025	0.000318384
		537.25	0.000323842
		537.475	0.00032949
		537.7	0.000335288
		537.925	0.000341323
		538.15	0.000347553
		538.375	0.000353981
		538.6	0.000360608
		538.825	0.000367439
		539.05	0.000374474
		539.275	0.000381715
		539.5	0.000389166
		539.725	0.000396828
		539.95	0.000404704
		540.175	0.000412756
		540.4	0.000421066
		540.625	0.000429594
		540.85	0.000438343
		541.075	0.000447314
		541.3	0.000456508
		541.525	0.000465927
		541.75	0.000475532
		541.975	0.000485406
		542.2	0.000495507
		542.425	0.000505837
		542.65	0.000516395
		542.875	0.000527183
		543.1	0.0005382
		543.325	0.000549446
		543.55	0.000560921
		543.775	0.000572626
		544	0.000584558
		544.225	0.000596718
		544.45	0.000609104
		544.675	0.000621715
		544.9	0.00063455
		545.125	0.000647606
		545.35	0.000660881
		545.575	0.000674375
		545.8	0.000688082
		546.025	0.000702002
		546.25	0.000716131
		546.475	0.000730466
		546.7	0.000745002
		546.925	0.000759737
		547.15	0.000774666
		547.375	0.000789785
		547.6	0.000805089
		547.825	0.000820573
		548.05	0.000836232
		548.275	0.000852061
		548.5	0.000868054
		548.725	0.000884205
		548.95	0.000900507
		549.175	0.000916955
		549.4	0.000933541
		549.625	0.00095026
		549.85	0.000967102
		550.075	0.000984062
		550.3	0.00100113
		550.525	0.0010183
		550.75	0.00103557
		550.975	0.00105292
		551.2	0.00107031
		551.425	0.00108781
		551.65	0.00110537
		551.875	0.00112299
		552.1	0.00114064
		552.325	0.00115833
		552.55	0.00117604
		552.775	0.00119377
		553	0.00121151
		553.225	0.00122924
		553.45	0.00124696
		553.675	0.00126466
		553.9	0.00128233
		554.125	0.00129996
		554.35	0.00131753
		554.575	0.00133505
		554.8	0.00135247
		555.025	0.00136985
		555.25	0.00138714
		555.475	0.00140433
		555.7	0.00142143
		555.925	0.00143841
		556.15	0.00145527
		556.375	0.001472
		556.6	0.0014886
		556.825	0.00150505
		557.05	0.00152135
		557.275	0.00153749
		557.5	0.00155346
		557.725	0.00156926
		557.95	0.00158488
		558.175	0.00160032
		558.4	0.00161556
		558.625	0.00163061
		558.85	0.00164545
		559.075	0.00166009
		559.3	0.00167451
		559.525	0.00168872
		559.75	0.00170271
		559.975	0.00171648
		560.2	0.00173002
		560.425	0.00174333
		560.65	0.00175641
		560.875	0.00176926
		561.1	0.00178187
		561.325	0.00179425
		561.55	0.00180639
		561.775	0.00181829
		562	0.00182996
		562.225	0.0018414
		562.45	0.0018526
		562.675	0.00186356
		562.9	0.00187429
		563.125	0.00188479
		563.35	0.00189506
		563.575	0.00190511
		563.8	0.00191494
		564.025	0.00192454
		564.25	0.00193393
		564.475	0.0019431
		564.7	0.00195207
		564.925	0.00196083
		565.15	0.00196939
		565.375	0.00197775
		565.6	0.00198592
		565.825	0.00199391
		566.05	0.00200171
		566.275	0.00200934
		566.5	0.00201679
		566.725	0.00202408
		566.95	0.00203121
		567.175	0.00203818
		567.4	0.002045
		567.625	0.00205168
		567.85	0.00205821
		568.075	0.00206461
		568.3	0.00207087
		568.525	0.00207702
		568.75	0.00208303
		568.975	0.00208894
		569.2	0.00209473
		569.425	0.00210041
		569.65	0.00210598
		569.875	0.00211145
		570.1	0.00211683
		570.325	0.00212211
		570.55	0.00212729
		570.775	0.00213238
		571	0.00213739
		571.225	0.0021423
		571.45	0.00214713
		571.675	0.00215187
		571.9	0.00215653
		572.125	0.0021611
		572.35	0.00216558
		572.575	0.00216998
		572.8	0.00217428
		573.025	0.0021785
		573.25	0.00218262
		573.475	0.00218664
		573.7	0.00219057
		573.925	0.00219439
		574.15	0.0021981
		574.375	0.0022017
		574.6	0.00220518
		574.825	0.00220855
		575.05	0.00221178
		575.275	0.00221488
		575.5	0.00221784
		575.725	0.00222065
		575.95	0.0022233
		576.175	0.00222579
		576.4	0.00222812
		576.625	0.00223026
		576.85	0.00223221
		577.075	0.00223398
		577.3	0.00223553
		577.525	0.00223687
		577.75	0.00223799
		577.975	0.00223888
		578.2	0.00223953
		578.425	0.00223992
		578.65	0.00224005
		578.875	0.00223992
		579.1	0.0022395
		579.325	0.00223879
		579.55	0.00223779
		579.775	0.00223648
		580	0.00223485
		580.225	0.00223289
		580.45	0.0022306
		580.675	0.00222796
		580.9	0.00222497
		581.125	0.00222162
		581.35	0.0022179
		581.575	0.00221381
		581.8	0.00220933
		582.025	0.00220446
		582.25	0.0021992
		582.475	0.00219353
		582.7	0.00218746
		582.925	0.00218097
		583.15	0.00217407
		583.375	0.00216675
		583.6	0.002159
		583.825	0.00215083
		584.05	0.00214223
		584.275	0.0021332
		584.5	0.00212373
		584.725	0.00211384
		584.95	0.00210351
		585.175	0.00209275
		585.4	0.00208156
		585.625	0.00206994
		585.85	0.0020579
		586.075	0.00204544
		586.3	0.00203256
		586.525	0.00201926
		586.75	0.00200556
		586.975	0.00199145
		587.2	0.00197695
		587.425	0.00196206
		587.65	0.00194679
		587.875	0.00193114
		588.1	0.00191513
		588.325	0.00189877
		588.55	0.00188206
		588.775	0.00186501
		589	0.00184764
		589.225	0.00182995
		589.45	0.00181196
		589.675	0.00179369
		589.9	0.00177513
		590.125	0.00175631
		590.35	0.00173724
		590.575	0.00171793
		590.8	0.00169839
		591.025	0.00167864
		591.25	0.0016587
		591.475	0.00163857
		591.7	0.00161828
		591.925	0.00159783
		592.15	0.00157724
		592.375	0.00155653
		592.6	0.00153571
		592.825	0.0015148
		593.05	0.00149381
		593.275	0.00147276
		593.5	0.00145166
		593.725	0.00143052
		593.95	0.00140937
		594.175	0.00138821
		594.4	0.00136706
		594.625	0.00134593
		594.85	0.00132484
		595.075	0.00130381
		595.3	0.00128284
		595.525	0.00126195
		595.75	0.00124115
		595.975	0.00122046
		596.2	0.00119989
		596.425	0.00117944
		596.65	0.00115914
		596.875	0.00113898
		597.1	0.001119
		597.325	0.00109918
		597.55	0.00107955
		597.775	0.00106011
		598	0.00104088
		598.225	0.00102186
		598.45	0.00100306
		598.675	0.000984489
		598.9	0.000966154
		599.125	0.000948062
		599.35	0.00093022
		599.575	0.000912635
		599.8	0.000895311
		600.025	0.000878255
		600.25	0.00086147
		600.475	0.000844963
		600.7	0.000828735
		600.925	0.000812792
		601.15	0.000797136
		601.375	0.00078177
		601.6	0.000766695
		601.825	0.000751914
		602.05	0.000737429
		602.275	0.000723239
		602.5	0.000709347
		602.725	0.000695752
		602.95	0.000682453
		603.175	0.000669452
		603.4	0.000656746
		603.625	0.000644334
		603.85	0.000632217
		604.075	0.00062039
		604.3	0.000608853
		604.525	0.000597603
		604.75	0.000586638
		604.975	0.000575955
		605.2	0.000565551
		605.425	0.000555422
		605.65	0.000545565
		605.875	0.000535977
		606.1	0.000526653
		606.325	0.000517589
		606.55	0.000508782
		606.775	0.000500227
		607	0.000491919
		607.225	0.000483854
		607.45	0.000476027
		607.675	0.000468434
		607.9	0.000461069
		608.125	0.000453928
		608.35	0.000447006
		608.575	0.000440297
		608.8	0.000433797
		609.025	0.0004275
		609.25	0.000421401
		609.475	0.000415495
		609.7	0.000409777
		609.925	0.000404242
		610.15	0.000398885
		610.375	0.0003937
		610.6	0.000388683
		610.825	0.000383828
		611.05	0.000379131
		611.275	0.000374586
		611.5	0.000370189
		611.725	0.000365934
		611.95	0.000361818
		612.175	0.000357835
		612.4	0.000353981
		612.625	0.00035025
		612.85	0.00034664
		613.075	0.000343145
		613.3	0.00033976
		613.525	0.000336483
		613.75	0.000333309
		613.975	0.000330233
		614.2	0.000327252
		614.425	0.000324362
		614.65	0.000321559
		614.875	0.00031884
		615.1	0.000316201
		615.325	0.000313639
		615.55	0.00031115
		615.775	0.000308731
		616	0.00030638
		616.225	0.000304092
		616.45	0.000301866
		616.675	0.000299698
		616.9	0.000297585
		617.125	0.000295525
		617.35	0.000293516
		617.575	0.000291515
		617.8	0.000289602
		618.025	0.000287733
		618.25	0.000285904
		618.475	0.000284114
		618.7	0.000282361
		618.925	0.000280642
		619.15	0.000278957
		619.375	0.000277303
		619.6	0.000275679
		619.825	0.000274082
		620.05	0.000272512
		620.275	0.000270967
		620.5	0.000269446
		620.725	0.000267947
		620.95	0.000266469
		621.175	0.00026501
		621.4	0.000263571
		621.625	0.000262148
		621.85	0.000260743
		622.075	0.000259352
		622.3	0.000257977
		622.525	0.000256615
		622.75	0.000255266
		622.975	0.000253928
		623.2	0.000252603
		623.425	0.000251288
		623.65	0.000249982
		623.875	0.000248686
		624.1	0.000247399
		624.325	0.00024612
		624.55	0.000244849
		624.775	0.000243585
		625	0.000242327
		625.225	0.000241076
		625.45	0.000239831
		625.675	0.000238591
		625.9	0.000237356
		626.125	0.000236126
		626.35	0.000234901
		626.575	0.00023368
		626.8	0.000232463
		627.025	0.000231249
		627.25	0.00023004
		627.475	0.000228833
		627.7	0.00022763
		627.925	0.000226429
		628.15	0.000225232
		628.375	0.000224037
		628.6	0.000222845
		628.825	0.000221655
		629.05	0.000220467
		629.275	0.000219282
		629.5	0.000218098
		629.725	0.000216917
		629.95	0.000215738
		630.175	0.00021456
		630.4	0.000213385
		630.625	0.000212211
		630.85	0.00021104
		631.075	0.000209869
		631.3	0.000208701
		631.525	0.000207534
		631.75	0.000206369
		631.975	0.000205206
		632.2	0.000204045
		632.425	0.000202885
		632.65	0.000201727
		632.875	0.00020057
		633.1	0.000199415
		633.325	0.000198262
		633.55	0.000197111
		633.775	0.000195961
		634	0.000194774
		634.225	0.000193631
		634.45	0.00019249
		634.675	0.000191351
		634.9	0.000190213
		635.125	0.000189077
		635.35	0.000187943
		635.575	0.00018681
		635.8	0.00018568
		636.025	0.000184551
		636.25	0.000183424
		636.475	0.000182298
		636.7	0.000181175
		636.925	0.000180054
		637.15	0.000178936
		637.375	0.000177819
		637.6	0.000176704
		637.825	0.000175592
		638.05	0.000174482
		638.275	0.000173374
		638.5	0.000172269
		638.725	0.000171166
		638.95	0.000170066
		639.175	0.000168968
		639.4	0.000167872
		639.625	0.00016678
		639.85	0.00016569
		640.075	0.000164602
		640.3	0.000163517
		640.525	0.000162435
		640.75	0.000161356
		640.975	0.00016028
		641.2	0.000159207
		641.425	0.000158136
		641.65	0.000157069
		641.875	0.000156004
		642.1	0.000154942
		642.325	0.000153884
		642.55	0.000152829
		642.775	0.000151776
		643	0.000150727
		643.225	0.000149682
		643.45	0.000148639
		643.675	0.0001476
		643.9	0.000146564
		644.125	0.000145531
		644.35	0.000144502
		644.575	0.000143476
		644.8	0.000142453
		645.025	0.000141476
		645.25	0.000140462
		645.475	0.000139452
		645.7	0.000138446
		645.925	0.000137443
		646.15	0.000136444
		646.375	0.000135449
		646.6	0.000134457
		646.825	0.000133469
		647.05	0.000132485
		647.275	0.000131505
		647.5	0.000130529
		647.725	0.000129557
		647.95	0.000128588
		648.175	0.000127624
		648.4	0.000126663
		648.625	0.000125707
		648.85	0.000124755
		649.075	0.000123806
		649.3	0.000122862
		649.525	0.000121922
		649.75	0.000120986
		649.975	0.000120054
		650.2	0.000119126
		650.425	0.000118203
		650.65	0.000117284
		650.875	0.000116369
		651.1	0.000115458
		651.325	0.000114552
		651.55	0.00011365
		651.775	0.000112753
		652	0.000111859
		652.225	0.000110971
		652.45	0.000110086
		652.675	0.000109207
		652.9	0.000108331
		653.125	0.00010746
		653.35	0.000106594
		653.575	0.000105732
		653.8	0.000104875
		654.025	0.000104022
		654.25	0.000103174
		654.475	0.000102331
		654.7	0.000101492
		654.925	0.000100658
		655.15	9.98283e-05
		655.375	9.90035e-05
		655.6	9.81836e-05
		655.825	9.73683e-05
		656.05	9.65579e-05
		656.275	9.57522e-05
		656.5	9.49514e-05
		656.725	9.41553e-05
		656.95	9.33642e-05
		657.175	9.25779e-05
		657.4	9.17965e-05
		657.625	9.10201e-05
		657.85	9.02485e-05
		658.075	8.9482e-05
		658.3	8.87204e-05
		658.525	8.79638e-05
		658.75	8.72122e-05
		658.975	8.64657e-05
		659.2	8.57243e-05
		659.425	8.49879e-05
		659.65	8.42567e-05
		659.875	8.35306e-05
		660.1	8.28096e-05
		660.325	8.20938e-05
		660.55	8.13832e-05
		660.775	8.06779e-05
		661	7.99777e-05
		661.225	7.92829e-05
		661.45	7.85933e-05
		661.675	7.79091e-05
		661.9	7.72302e-05
		662.125	7.65567e-05
		662.35	7.58886e-05
		662.575	7.52259e-05
		662.8	7.45686e-05
		663.025	7.39168e-05
		663.25	7.32706e-05
		663.475	7.26298e-05
		663.7	7.19946e-05
		663.925	7.1365e-05
		664.15	7.0741e-05
		664.375	7.01227e-05
		664.6	6.951e-05
		664.825	6.8903e-05
		665.05	6.83018e-05
		665.275	6.77064e-05
		665.5	6.71168e-05
		665.725	6.6533e-05
		665.95	6.5955e-05
		666.175	6.5383e-05
		666.4	6.4817e-05
		666.625	6.42569e-05
		666.85	6.37029e-05
		667.075	6.31549e-05
		667.3	6.2613e-05
		667.525	6.20773e-05
		667.75	6.15477e-05
		667.975	6.10244e-05
		668.2	6.05074e-05
		668.425	5.99966e-05
		668.65	5.94922e-05
		668.875	5.89943e-05
		669.1	5.85028e-05
		669.325	5.80178e-05
		669.55	5.75393e-05
		669.775	5.70675e-05
		670	5.66023e-05
		670.225	5.61439e-05
		670.45	5.56922e-05
		670.675	5.52473e-05
		670.9	5.48093e-05
		671.125	5.43782e-05
		671.35	5.39542e-05
		671.575	5.35372e-05
		671.8	5.31273e-05
		672.025	5.27246e-05
		672.25	5.23292e-05
		672.475	5.19411e-05
		672.7	5.15604e-05
		672.925	5.11871e-05
		673.15	5.08213e-05
		673.375	5.04632e-05
		673.6	5.01127e-05
		673.825	4.977e-05
		674.05	4.94351e-05
		674.275	4.91082e-05
		674.5	4.87892e-05
		674.725	4.84783e-05
		674.95	4.81755e-05
		675.175	4.7881e-05
		675.4	4.75948e-05
		675.625	4.7317e-05
		675.85	4.70478e-05
		676.075	4.67871e-05
		676.3	4.65352e-05
		676.525	4.6292e-05
		676.75	4.60577e-05
		676.975	4.58325e-05
		677.2	4.56163e-05
		677.425	4.54093e-05
		677.65	4.52116e-05
		677.875	4.50234e-05
		678.1	4.48446e-05
		678.325	4.46755e-05
		678.55	4.45162e-05
		678.775	4.43667e-05
		679	4.42272e-05
		679.225	4.40978e-05
		679.45	4.39786e-05
		679.675	4.38698e-05
		679.9	4.37714e-05
		680.125	4.36837e-05
		680.35	4.36066e-05
		680.575	4.35405e-05
		680.8	4.34853e-05
		681.025	4.34413e-05
		681.25	4.34086e-05
		681.475	4.33872e-05
		681.7	4.33775e-05
		681.925	4.33794e-05
		682.15	4.33932e-05
		682.375	4.34189e-05
		682.6	4.34569e-05
		682.825	4.35071e-05
		683.05	4.35698e-05
		683.275	4.3645e-05
		683.5	4.37331e-05
		683.725	4.38341e-05
		683.95	4.39482e-05
		684.175	4.40756e-05
		684.4	4.42163e-05
		684.625	4.43707e-05
		684.85	4.45389e-05
		685.075	4.4721e-05
		685.3	4.49172e-05
		685.525	4.51277e-05
		685.75	4.53527e-05
		685.975	4.55924e-05
		686.2	4.58469e-05
		686.425	4.61164e-05
		686.65	4.64011e-05
		686.875	4.67012e-05
		687.1	4.70169e-05
		687.325	4.73484e-05
		687.55	4.76959e-05
		687.775	4.80595e-05
		688	4.84395e-05
		688.225	4.8836e-05
		688.45	4.92494e-05
		688.675	4.96797e-05
		688.9	5.01271e-05
		689.125	5.05919e-05
		689.35	5.10743e-05
		689.575	5.15745e-05
		689.8	5.20927e-05
		690.025	5.2629e-05
		690.25	5.31838e-05
		690.475	5.37572e-05
		690.7	5.43494e-05
		690.925	5.49607e-05
		691.15	5.55913e-05
		691.375	5.62413e-05
		691.6	5.6911e-05
		691.825	5.76006e-05
		692.05	5.83103e-05
		692.275	5.90403e-05
		692.5	5.9791e-05
		692.725	6.05623e-05
		692.95	6.13547e-05
		693.175	6.21683e-05
		693.4	6.30033e-05
		693.625	6.386e-05
		693.85	6.47385e-05
		694.075	6.56391e-05
		694.3	6.6562e-05
		694.525	6.75075e-05
		694.75	6.84756e-05
		694.975	6.94668e-05
		695.2	7.0481e-05
		695.425	7.15187e-05
		695.65	7.258e-05
		695.875	7.3665e-05
		696.1	7.47741e-05
		696.325	7.59074e-05
		696.55	7.70652e-05
		696.775	7.82476e-05
		697	7.94549e-05
		697.225	8.06872e-05
		697.45	8.19448e-05
		697.675	8.32278e-05
		697.9	8.45365e-05
		698.125	8.58711e-05
		698.35	8.72317e-05
		698.575	8.86186e-05
		698.8	9.00318e-05
		699.025	9.14718e-05
		699.25	9.29385e-05
		699.475	9.44322e-05
		699.7	9.5953e-05
		699.925	9.75012e-05
		700.15	9.90769e-05
		700.375	0.00010068
		700.6	0.000102312
		700.825	0.000103971
		701.05	0.000105658
		701.275	0.000107374
		701.5	0.000109118
		701.725	0.000110891
		701.95	0.000112692
		702.175	0.000114523
		702.4	0.000116382
		702.625	0.00011827
		702.85	0.000120188
		703.075	0.000122135
		703.3	0.000124112
		703.525	0.000126118
		703.75	0.000128154
		703.975	0.000130219
		704.2	0.000132314
		704.425	0.00013444
		704.65	0.000136595
		704.875	0.00013878
		705.1	0.000140996
		705.325	0.000143241
		705.55	0.000145517
		705.775	0.000147823
		706	0.00015016
		706.225	0.000152527
		706.45	0.000154924
		706.675	0.000157351
		706.9	0.000159809
		707.125	0.000162297
		707.35	0.000164815
		707.575	0.000167364
		707.8	0.000169943
		708.025	0.000172552
		708.25	0.000175191
		708.475	0.000177861
		708.7	0.00018056
		708.925	0.00018329
		709.15	0.000186049
		709.375	0.000188839
		709.6	0.000191658
		709.825	0.000194506
		710.05	0.000197384
		710.275	0.000200291
		710.5	0.000203228
		710.725	0.000206193
		710.95	0.000209188
		711.175	0.000212211
		711.4	0.000215263
		711.625	0.000218343
		711.85	0.000221451
		712.075	0.000224587
		712.3	0.000227751
		712.525	0.000230942
		712.75	0.00023416
		712.975	0.000237406
		713.2	0.000240678
		713.425	0.000243977
		713.65	0.000247301
		713.875	0.000250652
		714.1	0.000254028
		714.325	0.000257429
		714.55	0.000260855
		714.775	0.000264306
		715	0.00026778
		715.225	0.000271279
		715.45	0.000274801
		715.675	0.000278346
		715.9	0.000281914
		716.125	0.000285504
		716.35	0.000289116
		716.575	0.000292749
		716.8	0.000296403
		717.025	0.000300077
		717.25	0.000303772
		717.475	0.000307486
		717.7	0.000311219
		717.925	0.00031497
		718.15	0.00031874
		718.375	0.000322527
		718.6	0.000326331
		718.825	0.000330152
		719.05	0.000333988
		719.275	0.00033784
		719.5	0.000341706
		719.725	0.000345586
		719.95	0.00034948
		720.175	0.000353387
		720.4	0.000357306
		720.625	0.000361237
		720.85	0.000365179
		721.075	0.000369132
		721.3	0.000373094
		721.525	0.000377065
		721.75	0.000381044
		721.975	0.000385031
		722.2	0.000389025
		722.425	0.000393026
		722.65	0.000397032
		722.875	0.000401042
		723.1	0.000405057
		723.325	0.000409076
		723.55	0.000413097
		723.775	0.000417119
		724	0.000421143
		724.225	0.000425168
		724.45	0.000429191
		724.675	0.000433214
		724.9	0.000437234
		725.125	0.000441252
		725.35	0.000445266
		725.575	0.000449276
		725.8	0.00045328
		726.025	0.000457278
		726.25	0.00046127
		726.475	0.000465253
		726.7	0.000469229
		726.925	0.000473194
		727.15	0.000477149
		727.375	0.000481094
		727.6	0.000485026
		727.825	0.000488945
		728.05	0.000492851
		728.275	0.000496742
		728.5	0.000500618
		728.725	0.000504477
		728.95	0.000508319
		729.175	0.000512143
		729.4	0.000515948
		729.625	0.000519734
		729.85	0.000523498
		730.075	0.000527241
		730.3	0.000530962
		730.525	0.000534659
		730.75	0.000538333
		730.975	0.000541981
		731.2	0.000545603
		731.425	0.000549198
		731.65	0.000552766
		731.875	0.000556305
		732.1	0.000559815
		732.325	0.000563294
		732.55	0.000566742
		732.775	0.000570159
		733	0.000573542
		733.225	0.000576892
		733.45	0.000580207
		733.675	0.000583487
		733.9	0.00058673
		734.125	0.000589937
		734.35	0.000593106
		734.575	0.000596236
		734.8	0.000599326
		735.025	0.000602377
		735.25	0.000605386
		735.475	0.000608353
		735.7	0.000611278
		735.925	0.00061416
		736.15	0.000616997
		736.375	0.000619789
		736.6	0.000622536
		736.825	0.000625236
		737.05	0.000627889
		737.275	0.000630495
		737.5	0.000633052
		737.725	0.00063556
		737.95	0.000638017
		738.175	0.000640425
		738.4	0.000642781
		738.625	0.000645085
		738.85	0.000647337
		739.075	0.000649536
		739.3	0.000651681
		739.525	0.000653772
		739.75	0.000655808
		739.975	0.000657788
		740.2	0.000659713
		740.425	0.000661581
		740.65	0.000663392
		740.875	0.000665146
		741.1	0.000666842
		741.325	0.000668479
		741.55	0.000670057
		741.775	0.000671576
		742	0.000673035
		742.225	0.000674433
		742.45	0.000675772
		742.675	0.000677049
		742.9	0.000678264
		743.125	0.000679419
		743.35	0.000680511
		743.575	0.00068154
		743.8	0.000682507
		744.025	0.000683412
		744.25	0.000684252
		744.475	0.00068503
		744.7	0.000685744
		744.925	0.000686394
		745.15	0.00068698
		745.375	0.000687502
		745.6	0.000687959
		745.825	0.000688352
		746.05	0.000688681
		746.275	0.000688944
		746.5	0.000689143
		746.725	0.000689277
		746.95	0.000689347
		747.175	0.000689351
		747.4	0.00068929
		747.625	0.000689165
		747.85	0.000688974
		748.075	0.000688719
		748.3	0.000688399
		748.525	0.000688014
		748.75	0.000687565
		748.975	0.000687052
		749.2	0.000686474
		749.425	0.000685832
		749.65	0.000685126
		749.875	0.000684356
		750.1	0.000683523
		750.325	0.000682626
		750.55	0.000681667
		750.775	0.000680644
		751	0.000679559
		751.225	0.000678412
		751.45	0.000677203
		751.675	0.000675933
		751.9	0.000674601
		752.125	0.000673208
		752.35	0.000671755
		752.575	0.000670242
		752.8	0.000668669
		753.025	0.000667037
		753.25	0.000665347
		753.475	0.000663598
		753.7	0.000661791
		753.925	0.000659927
		754.15	0.000658006
		754.375	0.000656029
		754.6	0.000653996
		754.825	0.000651908
		755.05	0.000649766
		755.275	0.000647569
		755.5	0.000645319
		755.725	0.000643016
		755.95	0.000640661
		756.175	0.000638255
		756.4	0.000635797
		756.625	0.000633289
		756.85	0.000630732
		757.075	0.000628126
		757.3	0.000625471
		757.525	0.000622769
		757.75	0.00062002
		757.975	0.000617226
		758.2	0.000614385
		758.425	0.000611501
		758.65	0.000608572
		758.875	0.0006056
		759.1	0.000602586
		759.325	0.00059953
		759.55	0.000596434
		759.775	0.000593297
		760	0.000590122
		760.225	0.000586908
		760.45	0.000583656
		760.675	0.000580368
		760.9	0.000577044
		761.125	0.000573685
		761.35	0.000570291
		761.575	0.000566864
		761.8	0.000563405
		762.025	0.000559914
		762.25	0.000556392
		762.475	0.00055284
		762.7	0.000549259
		762.925	0.000545649
		763.15	0.000542012
		763.375	0.000538349
		763.6	0.00053466
		763.825	0.000530946
		764.05	0.000527208
		764.275	0.000523447
		764.5	0.000519664
		764.725	0.00051586
		764.95	0.000512035
		765.175	0.000508191
		765.4	0.000504327
		765.625	0.000500446
		765.85	0.000496548
		766.075	0.000492634
		766.3	0.000488705
		766.525	0.000484761
		766.75	0.000480804
		766.975	0.000476834
		767.2	0.000472852
		767.425	0.000468859
		767.65	0.000464856
		767.875	0.000460843
		768.1	0.000456823
		768.325	0.000452794
		768.55	0.000448759
		768.775	0.000444718
		769	0.000440671
		769.225	0.000436621
		769.45	0.000432566
		769.675	0.000428509
		769.9	0.00042445
		770.125	0.000420349
		770.35	0.000416289
		770.575	0.00041223
		770.8	0.000408171
		771.025	0.000404114
		771.25	0.00040006
		771.475	0.000396009
		771.7	0.000391962
		771.925	0.00038792
		772.15	0.000383883
		772.375	0.000379853
		772.6	0.000375829
		772.825	0.000371813
		773.05	0.000367805
		773.275	0.000363806
		773.5	0.000359816
		773.725	0.000355837
		773.95	0.000351868
		774.175	0.000347911
		774.4	0.000343966
		774.625	0.000340033
		774.85	0.000336114
		775.075	0.000332209
		775.3	0.000328317
		775.525	0.000324441
		775.75	0.000320581
		775.975	0.000316736
		776.2	0.000312908
		776.425	0.000309097
		776.65	0.000305304
		776.875	0.000301529
		777.1	0.000297772
		777.325	0.000294034
		777.55	0.000290316
		777.775	0.000286618
		778	0.000282941
		778.225	0.000279284
		778.45	0.000275648
		778.675	0.000272034
		778.9	0.000268442
		779.125	0.000264873
		779.35	0.000261326
		779.575	0.000257802
		779.8	0.000254302
		780.025	0.000250826
		780.25	0.000247374
		780.475	0.000243946
		780.7	0.000240544
		780.925	0.000237166
		781.15	0.000233814
		781.375	0.000230487
		781.6	0.000227186
		781.825	0.000223911
		782.05	0.000220663
		782.275	0.000217441
		782.5	0.000214247
		782.725	0.000211079
		782.95	0.000207938
		783.175	0.000204825
		783.4	0.000201739
		783.625	0.000198681
		783.85	0.000195651
		784.075	0.000192649
		784.3	0.000189675
		784.525	0.00018673
		784.75	0.000183812
		784.975	0.000180924
		785.2	0.000178064
		785.425	0.000175232
		785.65	0.000172429
		785.875	0.000169656
		786.1	0.000166911
		786.325	0.000164194
		786.55	0.000161507
		786.775	0.000158849
		787	0.00015622
		787.225	0.00015362
		787.45	0.000151049
		787.675	0.000148507
		787.9	0.000145994
		788.125	0.00014351
		788.35	0.000141054
		788.575	0.000138628
		788.8	0.000136231
		789.025	0.000133862
		789.25	0.000131522
		789.475	0.000129211
		789.7	0.000126929
		789.925	0.000124675
		790.15	0.00012245
		790.375	0.000120253
		790.6	0.000118084
		790.825	0.000115943
		791.05	0.000113831
		791.275	0.000111746
		791.5	0.000109689
		791.725	0.00010766
		791.95	0.000105659
		792.175	0.000103685
		792.4	0.000101738
		792.625	9.98181e-05
		792.85	9.79254e-05
		793.075	9.60595e-05
		793.3	9.42203e-05
		793.525	9.24075e-05
		793.75	9.06211e-05
		793.975	8.88609e-05
		794.2	8.71266e-05
		794.425	8.54181e-05
		794.65	8.37352e-05
		794.875	8.20777e-05
		795.1	8.04454e-05
		795.325	7.88381e-05
		795.55	7.72557e-05
		795.775	7.56979e-05
		796	7.41645e-05
		796.225	7.26553e-05
		796.45	7.11701e-05
		796.675	6.97086e-05
		796.9	6.82708e-05
		797.125	6.68563e-05
		797.35	6.54649e-05
		797.575	6.40964e-05
		797.8	6.27506e-05
		798.025	6.14273e-05
		798.25	6.01262e-05
		798.475	5.88471e-05
		798.7	5.75897e-05
		798.925	5.6354e-05
		799.15	5.51395e-05
		799.375	5.39461e-05
		799.6	5.27736e-05
		799.825	5.16216e-05
		800.05	5.04901e-05
		800.275	4.93787e-05
		800.5	4.82872e-05
		800.725	4.72154e-05
		800.95	4.6163e-05
		801.175	4.51298e-05
		801.4	4.41156e-05
		801.625	4.312e-05
		801.85	4.2143e-05
		802.075	4.11843e-05
		802.3	4.02435e-05
		802.525	3.93205e-05
		802.75	3.84151e-05
		802.975	3.75269e-05
		803.2	3.66559e-05
		803.425	3.58017e-05
		803.65	3.49641e-05
		803.875	3.41428e-05
		804.1	3.33377e-05
		804.325	3.25485e-05
		804.55	3.1775e-05
		804.775	3.1017e-05
		805	3.02742e-05
		805.225	2.95464e-05
		805.45	2.88333e-05
		805.675	2.81348e-05
		805.9	2.74507e-05
		806.125	2.67806e-05
		806.35	2.61245e-05
		806.575	2.5482e-05
		806.8	2.48529e-05
		807.025	2.42372e-05
		807.25	2.36344e-05
		807.475	2.30444e-05
		807.7	2.24671e-05
		807.925	2.19021e-05
		808.15	2.13494e-05
		808.375	2.08086e-05
		808.6	2.02796e-05
		808.825	1.97622e-05
		809.05	1.92562e-05
		809.275	1.87614e-05
		809.5	1.82775e-05
		809.725	1.78045e-05
		809.95	1.7342e-05
		810.175	1.689e-05
		810.4	1.64482e-05
		810.625	1.60165e-05
		810.85	1.55946e-05
		811.075	1.51824e-05
		811.3	1.47797e-05
		811.525	1.43863e-05
		811.75	1.4002e-05
		811.975	1.36268e-05
		812.2	1.32603e-05
		812.425	1.29025e-05
		812.65	1.25532e-05
		812.875	1.22121e-05
		813.1	1.18792e-05
		813.325	1.15543e-05
		813.55	1.12372e-05
		813.775	1.09278e-05
		814	1.06259e-05
		814.225	1.03314e-05
		814.45	1.00441e-05
		814.675	9.76382e-06
		814.9	9.49049e-06
		815.125	9.22395e-06
		815.35	8.96404e-06
		815.575	8.71064e-06
		815.8	8.4636e-06
		816.025	8.22279e-06
		816.25	7.98808e-06
		816.475	7.75934e-06
		816.7	7.53644e-06
		816.925	7.31924e-06
		817.15	7.10764e-06
		817.375	6.9015e-06
		817.6	6.70071e-06
		817.825	6.50515e-06
		818.05	6.31469e-06
		818.275	6.12924e-06
		818.5	5.94867e-06
		818.725	5.77288e-06
		818.95	5.60175e-06
		819.175	5.43518e-06
		819.4	5.27307e-06
		819.625	5.1153e-06
		819.85	4.96179e-06
		820.075	4.81244e-06
		820.3	4.66714e-06
		820.525	4.5258e-06
		820.75	4.38832e-06
		820.975	4.25462e-06
		821.2	4.1246e-06
		821.425	3.99818e-06
		821.65	3.87527e-06
		821.875	3.75578e-06
		822.1	3.63964e-06
		822.325	3.52675e-06
		822.55	3.41704e-06
		822.775	3.31043e-06
		823	3.20684e-06
		823.225	3.10621e-06
		823.45	3.00844e-06
		823.675	2.91348e-06
		823.9	2.82125e-06
		824.125	2.73168e-06
		824.35	2.64471e-06
		824.575	2.56026e-06
		824.8	2.47828e-06
		825.025	2.39869e-06
		825.25	2.32144e-06
		825.475	2.24647e-06
		825.7	2.17371e-06
		825.925	2.10312e-06
		826.15	2.03462e-06
		826.375	1.96817e-06
		826.6	1.9037e-06
		826.825	1.84118e-06
		827.05	1.78054e-06
		827.275	1.72173e-06
		827.5	1.66472e-06
		827.725	1.60943e-06
		827.95	1.55584e-06
		828.175	1.50389e-06
		828.4	1.45353e-06
		828.625	1.40473e-06
		828.85	1.35744e-06
		829.075	1.31162e-06
		829.3	1.26723e-06
		829.525	1.22422e-06
		829.75	1.18256e-06
		829.975	1.14221e-06
		830.2	1.10313e-06
		830.425	1.06529e-06
		830.65	1.02865e-06
		830.875	9.93178e-07
		831.1	9.58837e-07
		831.325	9.25597e-07
		831.55	8.93424e-07
		831.775	8.62289e-07
		832	8.32159e-07
		832.225	8.03007e-07
		832.45	7.74803e-07
		832.675	7.47519e-07
		832.9	7.21128e-07
		833.125	6.95603e-07
		833.35	6.70918e-07
		833.575	6.47048e-07
		833.8	6.23968e-07
		834.025	6.01655e-07
		834.25	5.80085e-07
		834.475	5.59235e-07
		834.7	5.39084e-07
		834.925	5.1961e-07
		835.15	5.00792e-07
		835.375	4.82611e-07
		835.6	4.65045e-07
		835.825	4.48076e-07
		836.05	4.31686e-07
		836.275	4.15856e-07
		836.5	4.00569e-07
		836.725	3.85807e-07
		836.95	3.71555e-07
		837.175	3.57795e-07
		837.4	3.44512e-07
		837.625	3.31691e-07
		837.85	3.19317e-07
		838.075	3.07375e-07
		838.3	2.95852e-07
		838.525	2.84735e-07
		838.75	2.74009e-07
		838.975	2.63662e-07
		839.2	2.53682e-07
		839.425	2.44057e-07
		839.65	2.34775e-07
		839.875	2.25824e-07
		840.1	2.17195e-07
		840.325	2.08875e-07
		840.55	2.00855e-07
		840.775	1.93125e-07
		841	1.85675e-07
		841.225	1.78495e-07
		841.45	1.71577e-07
		841.675	1.64911e-07
		841.9	1.58489e-07
		842.125	1.52303e-07
		842.35	1.46345e-07
		842.575	1.40607e-07
		842.8	1.3508e-07
		843.025	1.29759e-07
		843.25	1.24636e-07
		843.475	1.19703e-07
		843.7	1.14955e-07
		843.925	1.10385e-07
		844.15	1.05986e-07
		844.375	1.01754e-07
		844.6	9.76805e-08
		844.825	9.37617e-08
		845.05	8.99916e-08
		845.275	8.6365e-08
		845.5	8.28767e-08
		845.725	7.95218e-08
		845.95	7.62954e-08
		846.175	7.31931e-08
		846.4	7.02103e-08
		846.625	6.73427e-08
		846.85	6.45861e-08
		847.075	6.19365e-08
		847.3	5.939e-08
		847.525	5.69428e-08
		847.75	5.45913e-08
		847.975	5.2332e-08
		848.2	5.01615e-08
		848.425	4.80764e-08
		848.65	4.60737e-08
		848.875	4.41502e-08
		849.1	4.2303e-08
		849.325	4.05293e-08
		849.55	0
		849.775	0
[truncated: 1 more rows]

## Sheet: PlotDat13
Source sheet	entregar - entregar	400	1.09382e-05	450	0	400	0
Plot name	ProbDens0	400.2	1.12834e-05	500	0	799.8	0
Plot Type	16	400.4	1.16826e-05	500	18
1st free col	9	400.6	1.20507e-05	450	18
Sigma Level	2	400.8	1.24295e-05	450	0
Absolute Errs	FALSE	401	1.28193e-05	ErrBox	ErrBox
Symbol Type	1	401.2	1.32203e-05	500	0
Inverse Plot	FALSE	401.4	1.36329e-05	550	0
Color Plot	TRUE	401.6	1.40573e-05	550	1
3D plot	FALSE	401.8	1.44939e-05	500	1
Linear	FALSE	402	1.4943e-05	500	0
Data Range	CO72:CP96	402.2	1.54049e-05	ErrBox	ErrBox
Filled Symbols	FALSE	402.4	1.588e-05	550	0
ConcAge	FALSE	402.6	1.63685e-05	600	0
ConcSwap	FALSE	402.8	1.68708e-05	600	2
1st Symbol-row	1	403	1.73872e-05	550	2
		403.2	1.79182e-05	550	0
		403.4	1.84641e-05	ErrBox	ErrBox
		403.6	1.90252e-05	600	0
		403.8	1.96019e-05	650	0
		404	2.01947e-05	650	2
		404.2	2.08039e-05	600	2
		404.4	2.14299e-05	600	0
		404.6	2.20732e-05	ErrBox	ErrBox
		404.8	2.27342e-05	650	0
		405	2.34132e-05	700	0
		405.2	2.41108e-05	700	1
		405.4	2.48274e-05	650	1
		405.6	2.55635e-05	650	0
		405.8	2.63194e-05	ErrBox	ErrBox
		406	2.70958e-05
		406.2	2.78931e-05
		406.4	2.87117e-05
		406.6	2.95523e-05
		406.8	3.04152e-05
		407	3.13011e-05
		407.2	3.22105e-05
		407.4	3.31439e-05
		407.6	3.41019e-05
		407.8	3.50851e-05
		408	3.6094e-05
		408.2	3.71292e-05
		408.4	3.81914e-05
		408.6	3.92811e-05
		408.8	4.0399e-05
		409	4.15457e-05
		409.2	4.27219e-05
		409.4	4.39713e-05
		409.6	4.52107e-05
		409.8	4.64818e-05
		410	4.77852e-05
		410.2	4.91216e-05
		410.4	5.04917e-05
		410.6	5.18964e-05
		410.8	5.33363e-05
		411	5.48122e-05
		411.2	5.63679e-05
		411.4	5.79207e-05
		411.6	5.95121e-05
		411.8	6.11428e-05
		412	6.28138e-05
		412.2	6.45258e-05
		412.4	6.62798e-05
		412.6	6.80766e-05
		412.8	6.99171e-05
		413	7.18023e-05
		413.2	7.3733e-05
		413.4	7.57103e-05
		413.6	7.7735e-05
		413.8	7.98082e-05
		414	8.19308e-05
		414.2	8.41039e-05
		414.4	8.63284e-05
		414.6	8.86054e-05
		414.8	9.0936e-05
		415	9.33213e-05
		415.2	9.57622e-05
		415.4	9.82599e-05
		415.6	0.000100816
		415.8	0.00010343
		416	0.000106105
		416.2	0.000108842
		416.4	0.000111684
		416.6	0.000114549
		416.8	0.000117479
		417	0.000120476
		417.2	0.00012354
		417.4	0.000126673
		417.6	0.000129877
		417.8	0.000133151
		418	0.000136499
		418.2	0.000139921
		418.4	0.000143418
		418.6	0.000146992
		418.8	0.000150644
		419	0.000154376
		419.2	0.000158189
		419.4	0.000162084
		419.6	0.000166063
		419.8	0.000170128
		420	0.00017428
		420.2	0.00017852
		420.4	0.00018285
		420.6	0.000187314
		420.8	0.000191832
		421	0.000196444
		421.2	0.000201153
		421.4	0.000205959
		421.6	0.000210866
		421.8	0.000215873
		422	0.000220984
		422.2	0.000226199
		422.4	0.00023152
		422.6	0.000236949
		422.8	0.000242488
		423	0.000248138
		423.2	0.000253902
		423.4	0.000259781
		423.6	0.000265776
		423.8	0.00027189
		424	0.000278124
		424.2	0.00028448
		424.4	0.000290961
		424.6	0.000297567
		424.8	0.000304301
		425	0.000311164
		425.2	0.000318159
		425.4	0.000325288
		425.6	0.000332551
		425.8	0.000339952
		426	0.000347492
		426.2	0.000355173
		426.4	0.000362997
		426.6	0.000370966
		426.8	0.000379082
		427	0.000387346
		427.2	0.000395762
		427.4	0.000404373
		427.6	0.000413099
		427.8	0.000421982
		428	0.000431024
		428.2	0.000440228
		428.4	0.000449594
		428.6	0.000459126
		428.8	0.000468825
		429	0.000478693
		429.2	0.000488733
		429.4	0.000498946
		429.6	0.000509334
		429.8	0.0005199
		430	0.000530645
		430.2	0.000541573
		430.4	0.000552728
		430.6	0.000564028
		430.8	0.000575516
		431	0.000587194
		431.2	0.000599065
		431.4	0.00061113
		431.6	0.000623391
		431.8	0.00063585
		432	0.00064851
		432.2	0.000661373
		432.4	0.00067444
		432.6	0.000687714
		432.8	0.000701197
		433	0.000714891
		433.2	0.000728797
		433.4	0.000742918
		433.6	0.000757256
		433.8	0.000771813
		434	0.000786591
		434.2	0.000801591
		434.4	0.000816817
		434.6	0.000832269
		434.8	0.00084795
		435	0.000863862
		435.2	0.000880006
		435.4	0.000896385
		435.6	0.000913
		435.8	0.000929854
		436	0.000946948
		436.2	0.000964284
		436.4	0.000981865
		436.6	0.00099969
		436.8	0.00101776
		437	0.00103609
		437.2	0.00105466
		437.4	0.00107349
		437.6	0.00109257
		437.8	0.00111195
		438	0.00113155
		438.2	0.00115141
		438.4	0.00117153
		438.6	0.00119192
		438.8	0.00121257
		439	0.00123348
		439.2	0.00125467
		439.4	0.00127612
		439.6	0.00129785
		439.8	0.00131985
		440	0.00134212
		440.2	0.00136467
		440.4	0.00138749
		440.6	0.0014106
		440.8	0.00143398
		441	0.00145769
		441.2	0.00148169
		441.4	0.00150593
		441.6	0.00153045
		441.8	0.00155527
		442	0.00158041
		442.2	0.00160581
		442.4	0.0016315
		442.6	0.00165748
		442.8	0.0016838
		443	0.00171037
		443.2	0.00173724
		443.4	0.00176441
		443.6	0.00179188
		443.8	0.00181965
		444	0.00184773
		444.2	0.0018761
		444.4	0.00190478
		444.6	0.00193377
		444.8	0.00196306
		445	0.00199266
		445.2	0.00202257
		445.4	0.00205279
		445.6	0.00208332
		445.8	0.00211416
		446	0.00214532
		446.2	0.00217679
		446.4	0.00220858
		446.6	0.00224068
		446.8	0.0022731
		447	0.00230593
		447.2	0.002339
		447.4	0.00237239
		447.6	0.00240611
		447.8	0.00244014
		448	0.00247451
		448.2	0.0025092
		448.4	0.00254422
		448.6	0.00257957
		448.8	0.00261525
		449	0.00265131
		449.2	0.00268766
		449.4	0.00272435
		449.6	0.00276138
		449.8	0.00279874
		450	0.00283645
		450.2	0.00287449
		450.4	0.00291288
		450.6	0.00295162
		450.8	0.00299071
		451	0.00303014
		451.2	0.00306993
		451.4	0.00311007
		451.6	0.00315057
		451.8	0.00319143
		452	0.00323264
		452.2	0.00327422
		452.4	0.00331617
		452.6	0.00335848
		452.8	0.00340117
		453	0.00344423
		453.2	0.00348767
		453.4	0.00353149
		453.6	0.00357569
		453.8	0.00362028
		454	0.00366526
		454.2	0.00371063
		454.4	0.0037564
		454.6	0.00380262
		454.8	0.00384921
		455	0.00389621
		455.2	0.00394362
		455.4	0.00399146
		455.6	0.00403972
		455.8	0.00408841
		456	0.00413753
		456.2	0.0041871
		456.4	0.00423712
		456.6	0.00428759
		456.8	0.00433852
		457	0.00438992
		457.2	0.00444179
		457.4	0.00449414
		457.6	0.00454697
		457.8	0.0046003
		458	0.00465414
		458.2	0.00470848
		458.4	0.00476334
		458.6	0.00481873
		458.8	0.00487465
		459	0.00493112
		459.2	0.00498814
		459.4	0.00504573
		459.6	0.00510388
		459.8	0.00516262
		460	0.00522196
		460.2	0.00528189
		460.4	0.00534244
		460.6	0.00540362
		460.8	0.00546544
		461	0.0055279
		461.2	0.00559102
		461.4	0.00565482
		461.6	0.0057193
		461.8	0.00578447
		462	0.00585036
		462.2	0.00591697
		462.4	0.00598432
		462.6	0.00605241
		462.8	0.00612127
		463	0.00619091
		463.2	0.00626133
		463.4	0.00633256
		463.6	0.00640461
		463.8	0.00647749
		464	0.00655122
		464.2	0.00662581
		464.4	0.00670127
		464.6	0.00677763
		464.8	0.00685489
		465	0.00693306
		465.2	0.00701217
		465.4	0.00709223
		465.6	0.00717324
		465.8	0.00725523
		466	0.00733821
		466.2	0.00742219
		466.4	0.00750718
		466.6	0.0075932
		466.8	0.00768026
		467	0.00776837
		467.2	0.00785754
		467.4	0.00794779
		467.6	0.00803912
		467.8	0.00813154
		468	0.00822507
		468.2	0.00831972
		468.4	0.00841548
		468.6	0.00851238
		468.8	0.00861041
		469	0.00870958
		469.2	0.0088099
		469.4	0.00891137
		469.6	0.009014
		469.8	0.00911778
		470	0.00922272
		470.2	0.00932882
		470.4	0.00943608
		470.6	0.00954449
		470.8	0.00965405
		471	0.00976476
		471.2	0.00987661
		471.4	0.0099896
		471.6	0.0101037
		471.8	0.0102189
		472	0.0103353
		472.2	0.0104527
		472.4	0.0105712
		472.6	0.0106907
		472.8	0.0108113
		473	0.0109329
		473.2	0.0110555
		473.4	0.0111791
		473.6	0.0113037
		473.8	0.0114292
		474	0.0115555
		474.2	0.0116828
		474.4	0.0118108
		474.6	0.0119397
		474.8	0.0120693
		475	0.0121997
		475.2	0.0123308
		475.4	0.0124625
		475.6	0.0125948
		475.8	0.0127276
		476	0.012861
		476.2	0.0129948
		476.4	0.0131291
		476.6	0.0132637
		476.8	0.0133986
		477	0.0135338
		477.2	0.0136692
		477.4	0.0138047
		477.6	0.0139403
		477.8	0.0140759
		478	0.0142114
		478.2	0.0143468
		478.4	0.0144821
		478.6	0.0146171
		478.8	0.0147517
		479	0.014886
		479.2	0.0150198
		479.4	0.0151531
		479.6	0.0152857
		479.8	0.0154177
		480	0.0155489
		480.2	0.0156793
		480.4	0.0158087
		480.6	0.0159371
		480.8	0.0160645
		481	0.0161907
		481.2	0.0163157
		481.4	0.0164393
		481.6	0.0165616
		481.8	0.0166824
		482	0.0168016
		482.2	0.0169192
		482.4	0.017035
		482.6	0.0171491
		482.8	0.0172613
		483	0.0173715
		483.2	0.0174797
		483.4	0.0175857
		483.6	0.0176896
		483.8	0.0177912
		484	0.0178904
		484.2	0.0179873
		484.4	0.0180816
		484.6	0.0181733
		484.8	0.0182624
		485	0.0183488
		485.2	0.0184325
		485.4	0.0185132
		485.6	0.0185911
		485.8	0.018666
		486	0.0187379
		486.2	0.0188066
		486.4	0.0188722
		486.6	0.0189347
		486.8	0.0189938
		487	0.0190496
		487.2	0.0191021
		487.4	0.0191512
		487.6	0.0191968
		487.8	0.019239
		488	0.0192776
		488.2	0.0193126
		488.4	0.019344
		488.6	0.0193718
		488.8	0.0193959
		489	0.0194164
		489.2	0.0194331
		489.4	0.0194461
		489.6	0.0194553
		489.8	0.0194608
		490	0.0194625
		490.2	0.0194604
		490.4	0.0194545
		490.6	0.0194448
		490.8	0.0194313
		491	0.019414
		491.2	0.0193929
		491.4	0.019368
		491.6	0.0193393
		491.8	0.0193068
		492	0.0192706
		492.2	0.0192306
		492.4	0.0191869
		492.6	0.0191395
		492.8	0.0190884
		493	0.0190336
		493.2	0.0189753
		493.4	0.0189133
		493.6	0.0188478
		493.8	0.0187788
		494	0.0187063
		494.2	0.0186303
		494.4	0.0185509
		494.6	0.0184682
		494.8	0.0183822
		495	0.0182929
		495.2	0.0182003
		495.4	0.0181047
		495.6	0.0180059
		495.8	0.0179041
		496	0.0177992
		496.2	0.0176915
		496.4	0.0175808
		496.6	0.0174674
		496.8	0.0173512
		497	0.0172323
		497.2	0.0171108
		497.4	0.0169867
		497.6	0.0168601
		497.8	0.0167312
		498	0.0165998
		498.2	0.0164662
		498.4	0.0163304
		498.6	0.0161925
		498.8	0.0160525
		499	0.0159105
		499.2	0.0157666
		499.4	0.0156208
		499.6	0.0154733
		499.8	0.015324
		500	0.0151732
		500.2	0.0150208
		500.4	0.014867
		500.6	0.0147117
		500.8	0.0145552
		501	0.0143974
		501.2	0.0142385
		501.4	0.0140784
		501.6	0.0139174
		501.8	0.0137554
		502	0.0135926
		502.2	0.013429
		502.4	0.0132646
		502.6	0.0130996
		502.8	0.0129341
		503	0.0127681
		503.2	0.0126016
		503.4	0.0124348
		503.6	0.0122678
		503.8	0.0121005
		504	0.0119331
		504.2	0.0117656
		504.4	0.0115981
		504.6	0.0114307
		504.8	0.0112634
		505	0.0110963
		505.2	0.0109295
		505.4	0.010763
		505.6	0.0105969
		505.8	0.0104313
		506	0.0102661
		506.2	0.0101016
		506.4	0.0099376
		506.6	0.00977434
		506.8	0.0096118
		507	0.00945006
		507.2	0.00928917
		507.4	0.00912916
		507.6	0.0089701
		507.8	0.00881204
		508	0.00865501
		508.2	0.00849907
		508.4	0.00834427
		508.6	0.00819063
		508.8	0.00803821
		509	0.00788705
		509.2	0.00773718
		509.4	0.00758864
		509.6	0.00744147
		509.8	0.0072957
		510	0.00715136
		510.2	0.00700849
		510.4	0.00686712
		510.6	0.00672727
		510.8	0.00658897
		511	0.00645225
		511.2	0.00631714
		511.4	0.00618364
		511.6	0.00605179
		511.8	0.00592161
		512	0.00579311
		512.2	0.00566632
		512.4	0.00554124
		512.6	0.00541789
		512.8	0.00529628
		513	0.00517643
		513.2	0.00505834
		513.4	0.00494203
		513.6	0.0048275
		513.8	0.00471476
		514	0.00460382
		514.2	0.00449467
		514.4	0.00438732
		514.6	0.00428177
		514.8	0.00417803
		515	0.00407608
		515.2	0.00397594
		515.4	0.00387759
		515.6	0.00378103
		515.8	0.00368626
		516	0.00359327
		516.2	0.00350206
		516.4	0.00341262
		516.6	0.00332493
		516.8	0.00323899
		517	0.00315479
		517.2	0.00307231
		517.4	0.00299155
		517.6	0.00291249
		517.8	0.00283512
		518	0.00275942
		518.2	0.00268539
		518.4	0.002613
		518.6	0.00254223
		518.8	0.00247308
		519	0.00240552
		519.2	0.00233954
		519.4	0.00227512
		519.6	0.00221224
		519.8	0.00215089
		520	0.00209103
		520.2	0.00203266
		520.4	0.00197576
		520.6	0.0019203
		520.8	0.00186626
		521	0.00181362
		521.2	0.00176237
		521.4	0.00171248
		521.6	0.00166393
		521.8	0.0016167
		522	0.00157077
		522.2	0.00152611
		522.4	0.00148271
		522.6	0.00144055
		522.8	0.00139959
		523	0.00135983
		523.2	0.00132124
		523.4	0.0012838
		523.6	0.00124748
		523.8	0.00121227
		524	0.00117815
		524.2	0.00114509
		524.4	0.00111307
		524.6	0.00108208
		524.8	0.00105209
		525	0.00102308
		525.2	0.000995073
		525.4	0.000967967
		525.6	0.000941783
		525.8	0.000916502
		526	0.000892103
		526.2	0.000868568
		526.4	0.000845878
		526.6	0.000824014
		526.8	0.000802958
		527	0.000782691
		527.2	0.000763158
		527.4	0.000744422
		527.6	0.000726422
		527.8	0.000709141
		528	0.000692563
		528.2	0.000676672
		528.4	0.00066145
		528.6	0.000646883
		528.8	0.000632955
		529	0.00061965
		529.2	0.000606953
		529.4	0.000594849
		529.6	0.000583325
		529.8	0.000572365
		530	0.000561957
		530.2	0.000552085
		530.4	0.000542738
		530.6	0.000533902
		530.8	0.000525564
		531	0.000517712
		531.2	0.000510333
		531.4	0.000503416
		531.6	0.000496949
		531.8	0.00049092
		532	0.000485319
		532.2	0.000480134
		532.4	0.000475355
		532.6	0.000470971
		532.8	0.000466934
		533	0.000463315
		533.2	0.000460023
		533.4	0.000457129
		533.6	0.000454582
		533.8	0.000452372
		534	0.000450491
		534.2	0.00044893
		534.4	0.000447682
		534.6	0.000446738
		534.8	0.00044609
		535	0.00044573
		535.2	0.000445652
		535.4	0.000445847
		535.6	0.000446309
		535.8	0.000447031
		536	0.000448005
		536.2	0.000449226
		536.4	0.000450686
		536.6	0.00045238
		536.8	0.000454302
		537	0.000456445
		537.2	0.000458803
		537.4	0.000461372
		537.6	0.000464144
		537.8	0.000467116
		538	0.000470242
		538.2	0.000473598
		538.4	0.000477137
		538.6	0.000480813
		538.8	0.000484708
		539	0.000488771
		539.2	0.000492998
		539.4	0.000497385
		539.6	0.000501927
		539.8	0.000506619
		540	0.000511459
		540.2	0.000516442
		540.4	0.000521563
		540.6	0.000526778
		540.8	0.000532167
		541	0.000537684
		541.2	0.000543323
		541.4	0.000549083
		541.6	0.000554958
		541.8	0.000560946
		542	0.000567043
		542.2	0.000573245
		542.4	0.000579509
		542.6	0.000585959
		542.8	0.000592463
		543	0.000599061
		543.2	0.000605748
		543.4	0.000612522
		543.6	0.000619379
		543.8	0.000626317
		544	0.000633334
		544.2	0.000640384
		544.4	0.000647551
		544.6	0.000654787
		544.8	0.000662089
		545	0.000669455
		545.2	0.000676882
		545.4	0.000684367
		545.6	0.000691908
		545.8	0.000699502
		546	0.000707146
		546.2	0.000714839
		546.4	0.000722577
		546.6	0.000730358
		546.8	0.000738179
		547	0.000746039
		547.2	0.000753934
		547.4	0.000761824
		547.6	0.000769787
		547.8	0.000777778
		548	0.000785755
		548.2	0.000793798
		548.4	0.000801862
		548.6	0.000809946
		548.8	0.000818046
		549	0.000826161
		549.2	0.000834288
		549.4	0.000842385
		549.6	0.000850534
		549.8	0.000858688
		550	0.000866847
		550.2	0.000875006
		550.4	0.000883166
		550.6	0.000891322
		550.8	0.000899474
		551	0.000907619
		551.2	0.000915755
		551.4	0.000923881
		551.6	0.000931994
		551.8	0.000940091
		552	0.000948132
		552.2	0.000956157
		552.4	0.000964204
		552.6	0.000972187
		552.8	0.00098019
		553	0.000988165
		553.2	0.000996112
		553.4	0.00100403
		553.6	0.00101191
		553.8	0.00101976
		554	0.00102758
		554.2	0.00103531
		554.4	0.00104305
		554.6	0.00105075
		554.8	0.00105841
		555	0.00106602
		555.2	0.00107359
		555.4	0.00108111
		555.6	0.00108858
		555.8	0.00109599
		556	0.00110336
		556.2	0.00111067
		556.4	0.00111793
		556.6	0.00112509
		556.8	0.00113223
		557	0.00113932
		557.2	0.00114634
		557.4	0.0011533
		557.6	0.0011602
		557.8	0.00116703
		558	0.00117379
		558.2	0.00118049
		558.4	0.00118712
		558.6	0.00119367
		558.8	0.00120016
		559	0.00120657
		559.2	0.00121291
		559.4	0.00121913
		559.6	0.00122532
		559.8	0.00123143
		560	0.00123747
		560.2	0.00124342
		560.4	0.0012493
		560.6	0.00125509
		560.8	0.0012608
		561	0.00126643
		561.2	0.00127197
		561.4	0.00127747
		561.6	0.00128285
		561.8	0.00128814
		562	0.00129334
		562.2	0.00129846
		562.4	0.00130349
		562.6	0.00130839
		562.8	0.00131324
		563	0.001318
		563.2	0.00132267
		563.4	0.00132725
		563.6	0.00133173
		563.8	0.00133613
		564	0.00134043
		564.2	0.00134464
		564.4	0.00134872
		564.6	0.00135275
		564.8	0.00135668
		565	0.00136052
		565.2	0.00136426
		565.4	0.00136791
		565.6	0.00137146
		565.8	0.00137492
		566	0.00137829
		566.2	0.00138155
		566.4	0.00138473
		566.6	0.0013878
		566.8	0.00139079
		567	0.00139367
		567.2	0.00139647
		567.4	0.00139916
		567.6	0.00140176
		567.8	0.00140427
		568	0.00140668
		568.2	0.001409
		568.4	0.00141122
		568.6	0.00141335
		568.8	0.00141538
		569	0.00141732
		569.2	0.00141917
		569.4	0.00142092
		569.6	0.00142258
		569.8	0.00142415
		570	0.00142563
		570.2	0.00142701
		570.4	0.00142831
		570.6	0.00142951
		570.8	0.00143062
		571	0.00143164
		571.2	0.00143258
		571.4	0.00143342
		571.6	0.00143418
		571.8	0.00143484
		572	0.00143542
		572.2	0.00143592
		572.4	0.00143633
		572.6	0.00143665
		572.8	0.00143689
		573	0.00143704
		573.2	0.00143711
		573.4	0.0014371
		573.6	0.00143701
		573.8	0.00143683
		574	0.00143658
		574.2	0.00143624
		574.4	0.00143583
		574.6	0.00143534
		574.8	0.00143477
		575	0.00143412
		575.2	0.0014334
		575.4	0.0014326
		575.6	0.00143173
		575.8	0.00143078
		576	0.00142976
		576.2	0.00142867
		576.4	0.00142751
		576.6	0.00142628
		576.8	0.00142498
		577	0.00142361
		577.2	0.00142218
		577.4	0.00142068
		577.6	0.00141911
		577.8	0.00141747
		578	0.00141578
		578.2	0.00141402
		578.4	0.0014122
		578.6	0.00141032
		578.8	0.00140837
		579	0.00140637
		579.2	0.00140431
		579.4	0.0014022
		579.6	0.00140002
		579.8	0.0013978
		580	0.00139551
		580.2	0.00139318
		580.4	0.00139079
		580.6	0.00138835
		580.8	0.00138586
		581	0.00138332
		581.2	0.00138074
		581.4	0.0013781
		581.6	0.00137542
		581.8	0.0013727
		582	0.00136992
		582.2	0.00136711
		582.4	0.00136426
		582.6	0.00136136
		582.8	0.00135842
		583	0.00135544
		583.2	0.00135243
		583.4	0.00134938
		583.6	0.00134629
		583.8	0.00134317
		584	0.00134001
		584.2	0.00133682
		584.4	0.0013336
		584.6	0.00133035
		584.8	0.00132707
		585	0.00132376
		585.2	0.00132042
		585.4	0.00131705
		585.6	0.00131366
		585.8	0.00131025
		586	0.00130681
		586.2	0.00130336
		586.4	0.00129988
		586.6	0.00129638
		586.8	0.00129286
		587	0.00128932
		587.2	0.00128577
		587.4	0.0012822
		587.6	0.00127862
		587.8	0.00127502
		588	0.00127141
		588.2	0.0012678
		588.4	0.00126417
		588.6	0.00126053
		588.8	0.00125689
		589	0.00125324
		589.2	0.00124958
		589.4	0.00124592
		589.6	0.00124226
		589.8	0.0012386
		590	0.00123493
		590.2	0.00123127
		590.4	0.00122761
		590.6	0.00122395
		590.8	0.0012203
		591	0.00121665
		591.2	0.00121301
		591.4	0.00120938
		591.6	0.00120576
		591.8	0.00120215
		592	0.00119855
		592.2	0.00119496
		592.4	0.00119139
		592.6	0.00118783
		592.8	0.00118429
		593	0.00118077
		593.2	0.00117727
		593.4	0.00117379
		593.6	0.00117033
		593.8	0.00116689
		594	0.00116348
		594.2	0.00116009
		594.4	0.00115673
		594.6	0.0011534
		594.8	0.0011501
		595	0.00114683
		595.2	0.0011436
		595.4	0.00114039
		595.6	0.00113722
		595.8	0.00113409
		596	0.001131
		596.2	0.00112794
		596.4	0.00112492
		596.6	0.00112195
		596.8	0.00111902
		597	0.00111613
		597.2	0.00111329
		597.4	0.00111049
		597.6	0.00110774
		597.8	0.00110504
		598	0.0011024
		598.2	0.0010998
		598.4	0.00109726
		598.6	0.00109477
		598.8	0.00109234
		599	0.00108996
		599.2	0.00108764
		599.4	0.00108539
		599.6	0.00108319
		599.8	0.00108106
		600	0.00107898
		600.2	0.00107698
		600.4	0.00107504
		600.6	0.00107316
		600.8	0.00107136
		601	0.00106962
		601.2	0.00106796
		601.4	0.00106636
		601.6	0.00106484
		601.8	0.0010634
		602	0.00106203
		602.2	0.00106073
		602.4	0.00105951
		602.6	0.00105838
		602.8	0.00105732
		603	0.00105634
		603.2	0.00105545
		603.4	0.00105463
		603.6	0.0010539
		603.8	0.00105326
		604	0.0010527
		604.2	0.00105223
		604.4	0.00105185
		604.6	0.00105156
		604.8	0.00105135
		605	0.00105124
		605.2	0.00105122
		605.4	0.00105129
		605.6	0.00105145
		605.8	0.00105171
		606	0.00105206
		606.2	0.00105251
		606.4	0.00105305
		606.6	0.00105369
		606.8	0.00105443
		607	0.00105526
		607.2	0.0010562
		607.4	0.00105723
		607.6	0.00105836
		607.8	0.0010596
		608	0.00106093
		608.2	0.00106237
		608.4	0.0010639
		608.6	0.00106554
		608.8	0.00106728
		609	0.00106913
		609.2	0.00107108
		609.4	0.00107313
		609.6	0.00107528
		609.8	0.00107754
		610	0.0010799
		610.2	0.00108236
		610.4	0.00108493
		610.6	0.0010876
		610.8	0.00109038
		611	0.00109326
		611.2	0.00109624
		611.4	0.00109933
		611.6	0.00110252
		611.8	0.00110581
		612	0.0011092
		612.2	0.0011127
		612.4	0.0011163
		612.6	0.00112001
		612.8	0.00112381
		613	0.00112772
		613.2	0.00113172
		613.4	0.00113583
		613.6	0.00114003
		613.8	0.00114434
		614	0.00114874
		614.2	0.00115324
		614.4	0.00115784
		614.6	0.00116253
		614.8	0.00116732
		615	0.0011722
		615.2	0.00117717
		615.4	0.00118224
		615.6	0.0011874
		615.8	0.00119265
		616	0.00119798
		616.2	0.00120341
		616.4	0.00120892
		616.6	0.00121452
		616.8	0.0012202
		617	0.00122597
		617.2	0.00123182
		617.4	0.00123774
		617.6	0.00124375
		617.8	0.00124983
		618	0.00125599
		618.2	0.00126223
		618.4	0.00126853
		618.6	0.00127491
		618.8	0.00128136
		619	0.00128788
		619.2	0.00129446
		619.4	0.00130111
		619.6	0.00130781
		619.8	0.00131458
		620	0.00132141
		620.2	0.0013283
		620.4	0.00133524
		620.6	0.00134223
		620.8	0.00134927
		621	0.00135637
		621.2	0.00136351
		621.4	0.00137069
		621.6	0.00137792
		621.8	0.00138519
		622	0.00139249
		622.2	0.00139983
		622.4	0.00140721
		622.6	0.00141461
		622.8	0.00142205
		623	0.00142951
		623.2	0.001437
		623.4	0.00144451
		623.6	0.00145204
		623.8	0.00145958
		624	0.00146714
		624.2	0.00147471
		624.4	0.0014823
		624.6	0.00148989
		624.8	0.00149748
		625	0.00150508
		625.2	0.00151267
		625.4	0.00152027
		625.6	0.00152785
		625.8	0.00153543
		626	0.001543
		626.2	0.00155056
		626.4	0.0015581
		626.6	0.00156562
		626.8	0.00157312
		627	0.0015806
		627.2	0.00158805
		627.4	0.00159547
		627.6	0.00160286
		627.8	0.00161021
		628	0.00161753
		628.2	0.00162481
		628.4	0.00163205
		628.6	0.00163924
		628.8	0.00164638
		629	0.00165348
		629.2	0.00166052
		629.4	0.0016675
		629.6	0.00167443
		629.8	0.0016813
		630	0.0016881
		630.2	0.00169484
		630.4	0.00170152
		630.6	0.00170812
		630.8	0.00171464
		631	0.0017211
		631.2	0.00172747
		631.4	0.00173376
		631.6	0.00173997
		631.8	0.0017461
		632	0.00175214
		632.2	0.00175809
		632.4	0.00176394
		632.6	0.0017697
		632.8	0.00177537
		633	0.00178093
		633.2	0.0017864
		633.4	0.00179176
		633.6	0.00179701
		633.8	0.00180216
		634	0.0018072
		634.2	0.00181212
		634.4	0.00181694
		634.6	0.00182163
		634.8	0.00182621
		635	0.00183067
		635.2	0.00183501
		635.4	0.00183923
		635.6	0.00184332
		635.8	0.00184728
		636	0.00185112
		636.2	0.00185483
		636.4	0.0018584
		636.6	0.00186184
		636.8	0.00186515
		637	0.00186832
		637.2	0.00187136
		637.4	0.00187426
		637.6	0.00187701
		637.8	0.00187963
		638	0.0018821
		638.2	0.00188443
		638.4	0.00188662
		638.6	0.00188866
		638.8	0.00189056
		639	0.00189231
		639.2	0.00189391
		639.4	0.00189536
		639.6	0.00189666
		639.8	0.00189781
		640	0.00189881
		640.2	0.00189966
		640.4	0.00190035
		640.6	0.0019009
		640.8	0.00190129
		641	0.00190153
		641.2	0.00190161
		641.4	0.00190154
		641.6	0.00190132
		641.8	0.0019009
		642	0.00190037
		642.2	0.00189969
		642.4	0.00189885
		642.6	0.00189785
		642.8	0.00189671
		643	0.00189541
		643.2	0.00189395
		643.4	0.00189234
		643.6	0.00189058
		643.8	0.00188867
		644	0.00188661
		644.2	0.00188439
		644.4	0.00188202
		644.6	0.0018795
		644.8	0.00187684
		645	0.00187402
		645.2	0.00187106
		645.4	0.00186795
		645.6	0.00186469
		645.8	0.00186129
		646	0.00185774
		646.2	0.00185405
		646.4	0.00185022
		646.6	0.00184625
		646.8	0.00184213
		647	0.00183788
		647.2	0.00183349
		647.4	0.00182897
		647.6	0.00182431
		647.8	0.00181952
		648	0.00181459
		648.2	0.00180954
		648.4	0.00180436
		648.6	0.00179905
		648.8	0.00179361
		649	0.00178805
		649.2	0.00178237
		649.4	0.00177657
		649.6	0.00177065
		649.8	0.00176461
		650	0.00175846
		650.2	0.0017522
		650.4	0.00174582
		650.6	0.00173934
		650.8	0.00173275
		651	0.00172605
		651.2	0.00171925
		651.4	0.00171234
		651.6	0.00170534
		651.8	0.00169824
		652	0.00169105
		652.2	0.00168376
		652.4	0.00167639
		652.6	0.00166892
		652.8	0.00166137
		653	0.00165373
		653.2	0.00164601
		653.4	0.00163822
		653.6	0.00163034
		653.8	0.00162239
		654	0.00161437
		654.2	0.00160627
		654.4	0.00159811
		654.6	0.00158988
		654.8	0.00158158
		655	0.00157323
		655.2	0.00156482
		655.4	0.00155635
		655.6	0.00154782
		655.8	0.00153924
		656	0.00153062
		656.2	0.00152194
		656.4	0.00151322
		656.6	0.00150446
		656.8	0.00149565
		657	0.00148681
		657.2	0.00147793
		657.4	0.00146902
		657.6	0.00146007
		657.8	0.0014511
		658	0.0014421
		658.2	0.00143307
		658.4	0.00142403
		658.6	0.00141496
		658.8	0.00140587
		659	0.00139677
		659.2	0.00138765
		659.4	0.00137853
		659.6	0.00136939
		659.8	0.00136024
		660	0.00135109
		660.2	0.00134194
		660.4	0.00133279
		660.6	0.00132364
		660.8	0.00131449
		661	0.00130534
		661.2	0.0012962
		661.4	0.00128707
		661.6	0.00127795
		661.8	0.00126885
		662	0.00125976
		662.2	0.00125068
		662.4	0.00124163
		662.6	0.00123259
		662.8	0.00122358
		663	0.00121459
		663.2	0.00120562
		663.4	0.00119668
		663.6	0.00118777
		663.8	0.00117889
		664	0.00117005
		664.2	0.00116123
		664.4	0.00115245
		664.6	0.00114371
		664.8	0.001135
		665	0.00112634
		665.2	0.00111771
		665.4	0.00110913
		665.6	0.00110059
		665.8	0.00109209
		666	0.00108364
		666.2	0.00107524
		666.4	0.00106688
		666.6	0.00105858
		666.8	0.00105032
		667	0.00104212
		667.2	0.00103397
		667.4	0.00102587
		667.6	0.00101783
		667.8	0.00100984
		668	0.00100191
		668.2	0.000994037
		668.4	0.000986223
		668.6	0.000978467
		668.8	0.000970772
		669	0.000963137
		669.2	0.000955563
		669.4	0.000948051
		669.6	0.000940602
		669.8	0.000933216
		670	0.000925894
		670.2	0.000918637
		670.4	0.000911444
		670.6	0.000904317
		670.8	0.000897255
		671	0.00089026
		671.2	0.000883331
		671.4	0.000876469
		671.6	0.000869674
		671.8	0.000862948
		672	0.000856288
		672.2	0.000849698
		672.4	0.000843175
		672.6	0.000836721
		672.8	0.000830335
		673	0.000824018
		673.2	0.00081777
		673.4	0.000811591
		673.6	0.000805481
		673.8	0.00079944
		674	0.000793468
		674.2	0.000787565
		674.4	0.000781689
		674.6	0.000775925
		674.8	0.00077023
		675	0.000764603
		675.2	0.000759044
		675.4	0.000753554
		675.6	0.000748131
		675.8	0.000742776
		676	0.000737488
		676.2	0.000732268
		676.4	0.000727114
		676.6	0.000722028
		676.8	0.000717007
		677	0.000712052
		677.2	0.000707163
		677.4	0.000702338
		677.6	0.000697579
		677.8	0.000692884
		678	0.000688253
		678.2	0.000683685
		678.4	0.00067918
		678.6	0.000674738
		678.8	0.000670358
		679	0.000666039
		679.2	0.000661781
		679.4	0.000657584
		679.6	0.000653447
		679.8	0.000649369
		680	0.00064535
		680.2	0.000641389
		680.4	0.000637486
		680.6	0.000633639
		680.8	0.00062985
		681	0.000626116
		681.2	0.000622437
		681.4	0.000618813
		681.6	0.000615243
		681.8	0.000611726
		682	0.000608262
		682.2	0.000604849
		682.4	0.000601488
		682.6	0.000598178
		682.8	0.000594918
		683	0.000591707
		683.2	0.000588544
		683.4	0.00058543
		683.6	0.000582363
		683.8	0.000579342
		684	0.000576367
		684.2	0.000573437
		684.4	0.000570552
		684.6	0.000567711
		684.8	0.000564912
		685	0.000562156
		685.2	0.000559442
		685.4	0.000556768
		685.6	0.000554135
		685.8	0.000551541
		686	0.000548987
		686.2	0.00054647
		686.4	0.000543991
		686.6	0.000541548
		686.8	0.000539142
		687	0.000536771
		687.2	0.000534435
		687.4	0.000532133
		687.6	0.000529864
		687.8	0.000527627
		688	0.000525423
		688.2	0.00052325
		688.4	0.000521108
		688.6	0.000518995
		688.8	0.000516912
		689	0.000514858
		689.2	0.000512832
		689.4	0.000510833
		689.6	0.000508861
		689.8	0.000506915
		690	0.000504994
		690.2	0.000503098
		690.4	0.000501227
		690.6	0.000499379
		690.8	0.000497554
		691	0.000495752
		691.2	0.000493972
		691.4	0.000492213
		691.6	0.000490474
		691.8	0.000488756
		692	0.000487057
		692.2	0.000485377
		692.4	0.000483716
		692.6	0.000482073
		692.8	0.000480447
		693	0.000478838
		693.2	0.000477246
		693.4	0.000475669
		693.6	0.000474107
		693.8	0.000472561
		694	0.000471029
		694.2	0.00046951
		694.4	0.000468005
		694.6	0.000466513
		694.8	0.000465034
		695	0.000463566
		695.2	0.00046211
		695.4	0.000460665
		695.6	0.000459231
		695.8	0.000457808
		696	0.000456394
		696.2	0.000454989
		696.4	0.000453594
		696.6	0.000452208
		696.8	0.000450829
		697	0.000449459
		697.2	0.000448096
		697.4	0.000446741
		697.6	0.000445392
		697.8	0.00044405
		698	0.000442714
		698.2	0.000441384
		698.4	0.000440059
		698.6	0.00043874
		698.8	0.000437425
		699	0.000436116
		699.2	0.00043481
		699.4	0.000433509
		699.6	0.000432211
		699.8	0.000430917
		700	0.000429626
		700.2	0.000428338
		700.4	0.000427052
		700.6	0.000425769
		700.8	0.000424489
		701	0.00042321
		701.2	0.000421933
		701.4	0.000420658
		701.6	0.000419384
		701.8	0.000418111
		702	0.000416839
		702.2	0.000415568
		702.4	0.000414298
		702.6	0.000413027
		702.8	0.000411757
		703	0.000410487
		703.2	0.000409217
		703.4	0.000407947
		703.6	0.000406676
		703.8	0.000405405
		704	0.000404133
		704.2	0.00040286
		704.4	0.000401586
		704.6	0.000400311
		704.8	0.000399035
		705	0.000397757
		705.2	0.000396478
		705.4	0.000395197
		705.6	0.000393915
		705.8	0.000392631
		706	0.000391345
		706.2	0.000390057
		706.4	0.000388767
		706.6	0.000387475
		706.8	0.000386181
		707	0.000384885
		707.2	0.000383586
		707.4	0.000382285
		707.6	0.000380982
		707.8	0.000379676
		708	0.000378367
		708.2	0.000377056
		708.4	0.000375743
		708.6	0.000374426
		708.8	0.000373108
		709	0.000371786
		709.2	0.000370462
		709.4	0.000369135
		709.6	0.000367805
		709.8	0.000366472
		710	0.000365136
		710.2	0.000363798
		710.4	0.000362457
		710.6	0.000361113
		710.8	0.000359766
		711	0.000358417
		711.2	0.000357064
		711.4	0.000355709
		711.6	0.000354351
		711.8	0.00035299
		712	0.000351626
		712.2	0.000350259
		712.4	0.00034889
		712.6	0.000347518
		712.8	0.000346143
		713	0.000344766
		713.2	0.000343386
		713.4	0.000342003
		713.6	0.000340617
		713.8	0.000339229
		714	0.000337839
		714.2	0.000336446
		714.4	0.00033505
		714.6	0.000333652
		714.8	0.000332252
		715	0.000330849
		715.2	0.000329444
		715.4	0.000328036
		715.6	0.000326627
		715.8	0.000325215
		716	0.000323801
		716.2	0.000322385
		716.4	0.000320967
		716.6	0.000319547
		716.8	0.000318125
		717	0.000316701
		717.2	0.000315275
		717.4	0.000313848
		717.6	0.000312419
		717.8	0.000310988
		718	0.000309556
		718.2	0.000308122
		718.4	0.000306687
		718.6	0.00030525
		718.8	0.000303812
		719	0.000302372
		719.2	0.000300932
		719.4	0.00029949
		719.6	0.000298047
		719.8	0.000296604
		720	0.000295159
		720.2	0.000293713
		720.4	0.000292267
		720.6	0.00029082
		720.8	0.000289372
		721	0.000287923
		721.2	0.000286474
		721.4	0.000285024
		721.6	0.000283575
		721.8	0.000282124
		722	0.000280674
		722.2	0.000279223
		722.4	0.000277772
		722.6	0.000276321
		722.8	0.00027487
		723	0.000273419
		723.2	0.000271968
		723.4	0.000270518
		723.6	0.000269068
		723.8	0.000267618
		724	0.000266168
		724.2	0.000264719
		724.4	0.000263271
		724.6	0.000261823
		724.8	0.000260376
		725	0.00025893
		725.2	0.000257485
		725.4	0.000256
		725.6	0.000254559
		725.8	0.000253118
		726	0.000251678
		726.2	0.00025024
		726.4	0.000248803
		726.6	0.000247367
		726.8	0.000245932
		727	0.000244499
		727.2	0.000243067
		727.4	0.000241637
		727.6	0.000240208
		727.8	0.000238781
		728	0.000237356
		728.2	0.000235932
		728.4	0.000234511
		728.6	0.000233091
		728.8	0.000231633
		729	0.000230219
		729.2	0.000228808
		729.4	0.000227398
		729.6	0.000225991
		729.8	0.000224586
		730	0.000223183
		730.2	0.000221783
		730.4	0.000220385
		730.6	0.00021899
		730.8	0.000217597
		731	0.000216207
		731.2	0.00021482
		731.4	0.000213435
		731.6	0.000212054
		731.8	0.000210675
		732	0.000209299
		732.2	0.000207927
		732.4	0.000206557
		732.6	0.000205191
		732.8	0.000203828
		733	0.000202468
		733.2	0.000201111
		733.4	0.000199758
		733.6	0.000198408
		733.8	0.000197062
		734	0.000195719
		734.2	0.00019438
		734.4	0.000193044
		734.6	0.000191712
		734.8	0.000190384
		735	0.00018906
		735.2	0.000187739
		735.4	0.000186423
		735.6	0.00018511
		735.8	0.000183801
		736	0.000182497
		736.2	0.000181196
		736.4	0.0001799
		736.6	0.000178607
		736.8	0.000177319
		737	0.000176036
		737.2	0.000174756
		737.4	0.000173481
		737.6	0.00017221
		737.8	0.000170944
		738	0.000169682
		738.2	0.000168424
		738.4	0.000167171
		738.6	0.000165923
		738.8	0.000164679
		739	0.00016344
		739.2	0.000162206
		739.4	0.000160976
		739.6	0.000159751
		739.8	0.000158531
		740	0.000157316
		740.2	0.000156105
		740.4	0.0001549
		740.6	0.000153699
		740.8	0.000152503
		741	0.000151313
		741.2	0.000150127
		741.4	0.000148946
		741.6	0.00014777
		741.8	0.0001466
		742	0.000145434
		742.2	0.000144274
		742.4	0.000143119
		742.6	0.000141969
		742.8	0.000140824
		743	0.000139685
		743.2	0.00013855
		743.4	0.000137421
		743.6	0.000136298
		743.8	0.000135179
		744	0.000134066
		744.2	0.000132959
		744.4	0.000131856
		744.6	0.000130759
		744.8	0.000129668
		745	0.000128582
		745.2	0.000127501
		745.4	0.000126426
		745.6	0.000125357
		745.8	0.000124292
		746	0.000123234
		746.2	0.000122181
		746.4	0.000121133
		746.6	0.000120091
		746.8	0.000119055
		747	0.000118024
		747.2	0.000116998
		747.4	0.000115979
		747.6	0.000114964
		747.8	0.000113956
		748	0.000112953
		748.2	0.000111956
		748.4	0.000110964
		748.6	0.000109978
		748.8	0.000108997
		749	0.000108023
		749.2	0.000107054
		749.4	0.00010609
		749.6	0.000105132
		749.8	0.00010418
		750	0.000103234
		750.2	0.000102293
		750.4	0.000101358
		750.6	0.000100429
		750.8	9.95049e-05
		751	9.85869e-05
		751.2	9.76745e-05
		751.4	9.67678e-05
		751.6	9.58668e-05
		751.8	9.49714e-05
		752	9.40817e-05
		752.2	9.31977e-05
		752.4	9.23193e-05
		752.6	9.14466e-05
		752.8	9.05796e-05
		753	8.97182e-05
		753.2	8.88625e-05
		753.4	8.80124e-05
		753.6	8.71679e-05
		753.8	8.63291e-05
		754	8.54959e-05
		754.2	8.46684e-05
		754.4	8.38464e-05
		754.6	8.303e-05
		754.8	8.22193e-05
		755	8.14141e-05
		755.2	8.06145e-05
		755.4	7.98205e-05
		755.6	7.9032e-05
		755.8	7.82491e-05
		756	7.74717e-05
		756.2	7.66999e-05
		756.4	7.59336e-05
		756.6	7.51727e-05
		756.8	7.44174e-05
		757	7.36676e-05
		757.2	7.29232e-05
		757.4	7.21843e-05
		757.6	7.14508e-05
		757.8	7.07227e-05
		758	7.00001e-05
		758.2	6.92829e-05
		758.4	6.8571e-05
		758.6	6.78646e-05
		758.8	6.71634e-05
		759	6.64677e-05
		759.2	6.57772e-05
		759.4	6.50921e-05
		759.6	6.44122e-05
		759.8	6.37377e-05
		760	6.30684e-05
		760.2	6.24043e-05
		760.4	6.17455e-05
		760.6	6.10918e-05
		760.8	6.04434e-05
		761	5.98001e-05
		761.2	5.9162e-05
		761.4	5.8529e-05
		761.6	5.79012e-05
		761.8	5.72784e-05
		762	5.66607e-05
		762.2	5.60481e-05
		762.4	5.54405e-05
		762.6	5.48379e-05
		762.8	5.42403e-05
		763	5.36477e-05
		763.2	5.30601e-05
		763.4	5.24774e-05
		763.6	5.18996e-05
		763.8	5.13267e-05
		764	5.07587e-05
		764.2	5.01955e-05
		764.4	4.96371e-05
		764.6	4.90836e-05
		764.8	4.85348e-05
		765	4.79908e-05
		765.2	4.74516e-05
		765.4	4.6917e-05
		765.6	4.63872e-05
		765.8	4.5862e-05
		766	4.53415e-05
		766.2	4.48256e-05
		766.4	4.43143e-05
		766.6	4.38076e-05
		766.8	4.33054e-05
		767	4.28078e-05
		767.2	4.23147e-05
		767.4	4.1826e-05
		767.6	4.13418e-05
		767.8	4.08621e-05
		768	4.03868e-05
		768.2	3.99158e-05
		768.4	3.94492e-05
		768.6	3.8987e-05
		768.8	3.85291e-05
		769	3.80754e-05
		769.2	3.7626e-05
		769.4	3.71809e-05
		769.6	3.674e-05
		769.8	3.63032e-05
		770	3.58707e-05
		770.2	3.54423e-05
		770.4	3.5018e-05
		770.6	3.45977e-05
		770.8	3.41816e-05
		771	3.37695e-05
		771.2	3.33614e-05
		771.4	3.29572e-05
		771.6	3.25571e-05
		771.8	3.21609e-05
		772	3.17686e-05
		772.2	3.13802e-05
		772.4	3.09956e-05
		772.6	3.06149e-05
		772.8	3.0238e-05
		773	2.98649e-05
		773.2	2.94956e-05
		773.4	2.91299e-05
		773.6	2.8768e-05
		773.8	2.84098e-05
		774	2.80552e-05
		774.2	2.77043e-05
		774.4	2.7357e-05
		774.6	2.70132e-05
		774.8	2.6673e-05
		775	2.63364e-05
		775.2	2.60032e-05
		775.4	2.56735e-05
		775.6	2.53473e-05
		775.8	2.50245e-05
		776	2.47051e-05
		776.2	2.43891e-05
		776.4	2.40765e-05
		776.6	2.37671e-05
		776.8	2.34611e-05
		777	2.31584e-05
		777.2	2.28589e-05
		777.4	2.25626e-05
		777.6	2.22695e-05
		777.8	2.19797e-05
		778	2.16929e-05
		778.2	2.14093e-05
		778.4	2.11288e-05
		778.6	2.08514e-05
		778.8	2.0577e-05
		779	2.03057e-05
		779.2	2.00374e-05
		779.4	1.9772e-05
		779.6	1.95096e-05
		779.8	1.92501e-05
		780	1.89936e-05
		780.2	1.87399e-05
		780.4	1.84891e-05
		780.6	1.82411e-05
		780.8	1.79959e-05
		781	1.77535e-05
		781.2	1.75139e-05
		781.4	1.7277e-05
		781.6	1.70429e-05
		781.8	1.68114e-05
		782	1.65826e-05
		782.2	1.63564e-05
		782.4	1.61329e-05
		782.6	1.5912e-05
		782.8	1.56936e-05
		783	1.54778e-05
		783.2	1.52645e-05
		783.4	1.50538e-05
		783.6	1.48455e-05
		783.8	1.46397e-05
		784	1.44363e-05
		784.2	1.42354e-05
		784.4	1.40368e-05
		784.6	1.38406e-05
		784.8	1.36468e-05
		785	1.34553e-05
		785.2	1.32661e-05
		785.4	1.30792e-05
		785.6	1.28945e-05
		785.8	1.27121e-05
		786	1.25319e-05
		786.2	1.23539e-05
		786.4	1.21781e-05
		786.6	1.20045e-05
		786.8	1.1833e-05
		787	1.16636e-05
		787.2	1.14963e-05
		787.4	1.13311e-05
		787.6	1.11679e-05
		787.8	1.10068e-05
		788	1.08477e-05
		788.2	1.06905e-05
		788.4	1.05354e-05
		788.6	1.03822e-05
		788.8	1.02309e-05
		789	1.00816e-05
		789.2	9.93416e-06
		789.4	9.78859e-06
		789.6	9.64488e-06
		789.8	9.503e-06
		790	9.36295e-06
		790.2	9.22469e-06
		790.4	9.08822e-06
		790.6	8.95351e-06
		790.8	8.82054e-06
		791	8.6893e-06
		791.2	8.55977e-06
		791.4	8.43192e-06
		791.6	8.30575e-06
		791.8	8.18124e-06
		792	8.05835e-06
		792.2	7.93709e-06
		792.4	7.81743e-06
		792.6	7.69935e-06
		792.8	7.58284e-06
		793	7.46788e-06
		793.2	7.35445e-06
		793.4	7.24254e-06
		793.6	7.13212e-06
		793.8	7.02319e-06
		794	6.91573e-06
		794.2	6.80971e-06
		794.4	6.70513e-06
		794.6	6.60196e-06
		794.8	6.5002e-06
		795	6.39982e-06
		795.2	6.30081e-06
		795.4	6.20315e-06
		795.6	6.10684e-06
		795.8	6.01185e-06
		796	5.91816e-06
		796.2	5.82577e-06
		796.4	5.73466e-06
		796.6	5.64481e-06
		796.8	5.55621e-06
		797	5.46884e-06
		797.2	5.38269e-06
		797.4	5.29775e-06
		797.6	5.214e-06
		797.8	5.13143e-06
		798	5.05002e-06
		798.2	4.96976e-06
		798.4	4.89064e-06
		798.6	4.81264e-06
		798.8	4.73574e-06
		799	4.65994e-06
		799.2	4.58523e-06
		799.4	4.51158e-06
		799.6	4.43899e-06
		799.8	4.36744e-06
[truncated: 1 more rows]

## Sheet: PlotDat4
Source sheet	entregar - entregar	0.584828	0.075508	0.558806	0.0723004	0.574259	0.0739651	0.589866	0.0756324	0.605627	0.0773023	0.621545	0.0789747	0.637621	0.0806498	0.554888	0.072	0.556079	0.072	0.553704	0.072	0.557657	0.0723004	0.597199	0.0761501	0.596972	0.0762919	0.609817	0.0769176	0.621917	0.0773392	0.630892	0.077391	0.613409	0.0770373	0.602436	0.0775109	0.619972	0.0773499	0.60275	0.0776222	0.626753	0.0773423	0.610787	0.0778518	0.620036	0.0779758	0.616227	0.0781187
Plot name	Concordia0	0.583586	0.0755686	0.558759	0.072328	0.574211	0.0739934	0.589816	0.0756613	0.605576	0.0773318	0.621492	0.079005	0.637566	0.0806807	0.554888	0.072	0.557737	0.0721795	0.554888	0.072129	0.573073	0.0739651	0.597071	0.0762833	0.596834	0.0764377	0.609653	0.077077	0.621762	0.0775027	0.6307	0.0775709	0.61321	0.0771708	0.602301	0.0776551	0.619832	0.0774696	0.602607	0.0777533	0.626561	0.0774895	0.610659	0.0779895	0.619882	0.0781115	0.616097	0.078258
Plot Type	1	0.593624	0.0762865	0.558623	0.0723534	0.574071	0.0740194	0.589672	0.0756879	0.605427	0.077359	0.621338	0.0790328	0.637408	0.0807091	0.557737	0.0723091	0.56059	0.0724882	0.557737	0.0724386	0.588642	0.0756324	0.596705	0.0764013	0.596437	0.0765667	0.609177	0.0772211	0.621324	0.0776435	0.63014	0.077734	0.612625	0.0772921	0.60192	0.0777814	0.619428	0.0775729	0.602202	0.0778614	0.625995	0.0776263	0.610299	0.0781076	0.619451	0.078219	0.615729	0.0783783
1st free col	53	0.607215	0.0763411	0.558409	0.0723745	0.57385	0.0740409	0.589443	0.07571	0.605192	0.0773816	0.621096	0.0790559	0.637158	0.0807327	0.56059	0.0726183	0.563449	0.0727969	0.56059	0.0727484	0.604365	0.0773023	0.596108	0.0765019	0.595791	0.0766761	0.608398	0.077347	0.620611	0.077759	0.629222	0.077877	0.611671	0.0773979	0.601298	0.0778872	0.618771	0.0776572	0.601547	0.0779436	0.625066	0.0777499	0.609714	0.0782036	0.618755	0.0782954	0.615131	0.0784771
Sigma Level	1	0.611804	0.0767052	0.558134	0.0723896	0.573566	0.0740564	0.58915	0.0757258	0.604889	0.0773978	0.620784	0.0790724	0.636837	0.0807496	0.563449	0.0729275	0.566314	0.0731056	0.563449	0.0730582	0.620244	0.0789747	0.595291	0.0765832	0.594907	0.0767641	0.607332	0.0774522	0.619638	0.0778468	0.627966	0.0779973	0.610372	0.0774852	0.600448	0.0779705	0.617878	0.0777201	0.600659	0.0779975	0.623791	0.077858	0.608914	0.0782758	0.617812	0.0783386	0.614314	0.0785525
Absolute Errs	TRUE	0.599063	0.0767227	0.55782	0.0723974	0.573242	0.0740644	0.588816	0.075734	0.604545	0.0774062	0.620429	0.079081	0.63647	0.0807584	0.566314	0.0732369	0.569183	0.0734145	0.566314	0.0733682	0.636279	0.0806498	0.594271	0.0766436	0.593802	0.0768287	0.605998	0.0775348	0.618423	0.0779054	0.626396	0.0780924	0.608766	0.0775518	0.599387	0.0780296	0.616775	0.0777598	0.599562	0.0780218	0.622197	0.0779485	0.607917	0.0783228	0.616649	0.0783473	0.613294	0.0786031
Symbol Type	1	0.589587	0.0767312	0.557493	0.0723974	0.572904	0.0740644	0.588468	0.075734	0.604185	0.0774062	0.620058	0.079081	0.636089	0.0807584	0.569183	0.0735464	0.572058	0.0737235	0.569183	0.0736782	IsoLine	IsoLine	0.593067	0.0766819	0.592499	0.0768689	0.604425	0.077593	0.61699	0.0779335	0.624541	0.0781605	0.606894	0.0775957	0.598135	0.0780636	0.615491	0.0777753	0.598287	0.0780158	0.620314	0.0780195	0.60674	0.0783436	0.615296	0.0783215	0.612091	0.0786278
Inverse Plot	FALSE	0.61015	0.0768725	0.557179	0.0723896	0.57258	0.0740564	0.588133	0.0757258	0.603841	0.0773978	0.619703	0.0790724	0.635722	0.0807496	0.572058	0.0738559	0.574938	0.0740325	0.572058	0.0739883			0.591702	0.0766973	0.591022	0.0768837	0.60264	0.0776258	0.615366	0.0779307	0.622438	0.0782003	0.604809	0.0776158	0.596717	0.0780715	0.614062	0.0777663	0.596869	0.0779796	0.618178	0.0780698	0.605408	0.0783378	0.613792	0.0782618	0.610728	0.0786262
Color Plot	TRUE	0.593016	0.0769103	0.556904	0.0723745	0.572296	0.0740409	0.58784	0.07571	0.603538	0.0773816	0.619391	0.0790559	0.635401	0.0807327	0.574938	0.0741655	0.577823	0.0743417	0.574938	0.0742985			0.590204	0.0766896	0.589401	0.0768729	0.600681	0.0776326	0.613584	0.0778968	0.620129	0.078211	0.602567	0.0776116	0.59516	0.0780534	0.612525	0.0777328	0.595345	0.0779143	0.615831	0.0780983	0.603946	0.0783055	0.612176	0.0781697	0.609232	0.0785983
3D plot	FALSE	0.607341	0.0769514	0.55669	0.0723534	0.572075	0.0740194	0.587612	0.0756879	0.603303	0.077359	0.619149	0.0790328	0.635151	0.0807091	0.577823	0.0744752	0.580713	0.0746509	0.577823	0.0746088			0.588601	0.0766588	0.587666	0.0768368	0.598584	0.0776131	0.611678	0.0778327	0.617657	0.0781923	0.600229	0.0775831	0.593494	0.0780096	0.610924	0.0776759	0.593757	0.0778216	0.613319	0.0781045	0.602382	0.0782474	0.610494	0.0780479	0.607632	0.0785447
Linear	FALSE	0.598727	0.0769783	0.556554	0.072328	0.571935	0.0739934	0.587468	0.0756613	0.603154	0.0773318	0.618995	0.079005	0.634993	0.0806807	0.580713	0.0747851	0.583609	0.0749602	0.580713	0.0749192			0.586925	0.0766057	0.585852	0.0767759	0.59639	0.0775679	0.609685	0.0777396	0.615072	0.0781447	0.59786	0.0775311	0.591753	0.0779408	0.609302	0.077597	0.59215	0.077704	0.610691	0.0780882	0.600747	0.0781646	0.60879	0.0778997	0.605959	0.0784664
Data Range	CB37:CF53	0.60972	0.0770781	0.556508	0.0723004	0.571887	0.0739651	0.587418	0.0756324	0.603103	0.0773023	0.618942	0.0789747	0.634938	0.0806498	0.583609	0.075095	0.58651	0.0752697	0.583609	0.0752297			0.585208	0.0765312	0.583993	0.0766916	0.594143	0.0774977	0.607643	0.0776193	0.612422	0.0780691	0.595523	0.0774571	0.589969	0.0778486	0.607703	0.0774984	0.590566	0.0775647	0.607997	0.0780498	0.599072	0.0780587	0.607111	0.077729	0.604246	0.0783649
Filled Symbols	FALSE	0.603888	0.0772758	0.556554	0.0722728	0.571935	0.0739368	0.587468	0.0756034	0.603154	0.0772727	0.618995	0.0789445	0.634993	0.0806188	0.58651	0.0754049	0.589417	0.0755792	0.58651	0.0755402			0.583483	0.0764368	0.582127	0.0765854	0.591885	0.0774039	0.605594	0.077474	0.609761	0.077967	0.593283	0.0773631	0.588178	0.0777345	0.606171	0.0773827	0.589049	0.0774076	0.605291	0.07799	0.597391	0.0779318	0.605504	0.0775406	0.602526	0.0782422
ConcAge	TRUE	IsoLine	IsoLine	0.55669	0.0722474	0.572075	0.0739108	0.587612	0.0755769	0.603303	0.0772455	0.619149	0.0789166	0.635151	0.0805904	0.589417	0.075715	0.592329	0.0758887	0.589417	0.0758509			0.581784	0.0763243	0.58029	0.0764594	0.589662	0.0772883	0.603576	0.0773067	0.60714	0.0778403	0.591201	0.0772516	0.586414	0.077601	0.604747	0.0772531	0.58764	0.077237	0.602624	0.07791	0.595736	0.0777863	0.604012	0.0773395	0.600832	0.0781007
ConcSwap	FALSE			0.556904	0.0722263	0.572296	0.0738893	0.58784	0.0755548	0.603538	0.0772229	0.619391	0.0788935	0.635401	0.0805668	0.592329	0.0760252	0.595246	0.0761984	0.592329	0.0761616			0.580145	0.076196	0.578516	0.0763161	0.587515	0.0771533	0.601629	0.0771207	0.604609	0.0776915	0.589333	0.0771256	0.584712	0.0774505	0.60347	0.0771131	0.586377	0.0770574	0.600049	0.0778114	0.594139	0.0776251	0.602675	0.0771314	0.599198	0.0779432
1st Symbol-row	1			0.557179	0.0722112	0.57258	0.0738738	0.588133	0.075539	0.603841	0.0772067	0.619703	0.078877	0.635722	0.0805499	0.595246	0.0763354	0.598168	0.0765082	0.595246	0.0764724			0.578597	0.0760542	0.576841	0.0761582	0.585488	0.0770014	0.59979	0.0769194	0.602219	0.0775235	0.587731	0.0769887	0.583105	0.077286	0.602376	0.0769666	0.585296	0.0768738	0.597617	0.077696	0.592632	0.0774514	0.601531	0.0769218	0.597656	0.0777727
				0.557493	0.0722034	0.572904	0.0738658	0.588468	0.0755307	0.604185	0.0771983	0.620058	0.0788684	0.636089	0.0805411	0.598168	0.0766458	0.601096	0.076818	0.598168	0.0767834			0.57717	0.0759018	0.575297	0.0759889	0.583618	0.0768356	0.598097	0.0767069	0.600015	0.0773396	0.586437	0.0768445	0.581624	0.0771108	0.601494	0.0768175	0.584426	0.0766912	0.595373	0.0775661	0.591243	0.0772684	0.60061	0.0767164	0.596234	0.0775924
				0.55782	0.0722034	0.573242	0.0738658	0.588816	0.0755307	0.604545	0.0771983	0.620429	0.0788684	0.63647	0.0805411	0.601096	0.0769562	0.604029	0.077128	0.601096	0.0770944			0.575893	0.0757417	0.573915	0.0758113	0.581944	0.076659	0.59658	0.0764873	0.59804	0.0771433	0.585489	0.076697	0.580298	0.0769281	0.600848	0.0766698	0.583789	0.0765146	0.593363	0.0774243	0.59	0.0770797	0.599937	0.0765209	0.594961	0.0774061
				0.558134	0.0722112	0.573566	0.0738738	0.58915	0.075539	0.604889	0.0772067	0.620784	0.078877	0.636837	0.0805499	0.604029	0.0772667	0.606968	0.077438	0.604029	0.0774055			0.574789	0.0755771	0.572721	0.0756291	0.580497	0.0764753	0.595271	0.0762648	0.596334	0.0769385	0.58491	0.0765502	0.579153	0.0767416	0.600456	0.0765278	0.583405	0.0763488	0.591624	0.0772732	0.588926	0.0768891	0.599531	0.0763406	0.593863	0.0772172
				0.558409	0.0722263	0.57385	0.0738893	0.589443	0.0755548	0.605192	0.0772229	0.621096	0.0788935	0.637158	0.0805668	0.606968	0.0775773	0.609912	0.0777481	0.606968	0.0777167			0.57388	0.0754112	0.571738	0.0754457	0.579305	0.0762878	0.594194	0.0760438	0.594928	0.0767292	0.584717	0.0764081	0.57821	0.0765549	0.600328	0.0763951	0.583282	0.0761983	0.590192	0.0771159	0.588044	0.0767002	0.599404	0.0761804	0.592959	0.0770294
				0.558623	0.0722474	0.574071	0.0739108	0.589672	0.0755769	0.605427	0.0772455	0.621338	0.0789166	0.637408	0.0805904	0.609912	0.077888	0.612861	0.0780584	0.609912	0.0780279			0.573185	0.0752471	0.570986	0.0752646	0.578392	0.0761004	0.59337	0.0758286	0.593851	0.0765194	0.584916	0.0762746	0.57749	0.0763716	0.600468	0.0762754	0.583425	0.0760672	0.589093	0.0769554	0.587369	0.0765167	0.599557	0.0760448	0.592268	0.0768464
				0.558759	0.0722728	0.574211	0.0739368	0.589816	0.0756034	0.605576	0.0772727	0.621492	0.0789445	0.637566	0.0806188	0.612861	0.0781988	0.615816	0.0783687	0.612861	0.0783393			0.572716	0.0750881	0.570479	0.0750895	0.577776	0.0759165	0.592816	0.0756234	0.593124	0.0763132	0.5855	0.0761533	0.577004	0.0761953	0.600872	0.076172	0.58383	0.0759591	0.58835	0.0767948	0.586915	0.0763422	0.599988	0.0759373	0.591803	0.0766718
				0.558806	0.0723004	0.574259	0.0739651	0.589866	0.0756324	0.605627	0.0773023	0.621545	0.0789747	0.637621	0.0806498	0.615816	0.0785097	0.618776	0.0786791	0.615816	0.0786508			0.572483	0.0749373	0.570228	0.0749237	0.577468	0.0757399	0.592542	0.0754321	0.59276	0.0761146	0.586455	0.0760475	0.576764	0.0760295	0.60153	0.0760878	0.584485	0.0758769	0.587976	0.0766373	0.586692	0.0761801	0.600684	0.0758609	0.591574	0.0765089
				ConcTikEll	ConcTikEll	ConcTikEll	ConcTikEll	ConcTikEll	ConcTikEll	ConcTikEll	ConcTikEll	ConcTikEll	ConcTikEll	ConcTikEll	ConcTikEll	0.618776	0.0788207	0.621741	0.0789895	0.618776	0.0789623			0.57249	0.0747976	0.570236	0.0747705	0.577474	0.0755739	0.592554	0.0752585	0.592766	0.0759275	0.587753	0.0759602	0.576773	0.0758773	0.602422	0.0760249	0.585373	0.075823	0.587979	0.0764859	0.586702	0.0760335	0.601627	0.0758177	0.591584	0.076361
																0.621741	0.0791318	0.624712	0.0793001	0.621741	0.079274			0.572738	0.0746717	0.570504	0.0746328	0.577795	0.0754218	0.592851	0.075106	0.593144	0.0757556	0.58936	0.0758936	0.577032	0.0757418	0.603525	0.0759852	0.58647	0.0757987	0.588359	0.0763435	0.586947	0.0759054	0.60279	0.0758089	0.591833	0.0762309
																0.624712	0.0794429	0.627689	0.0796108	0.624712	0.0795857			0.57322	0.0745621	0.571027	0.0745133	0.578424	0.0752864	0.593428	0.0749776	0.593884	0.0756022	0.591232	0.0758497	0.577535	0.0756255	0.604809	0.0759696	0.587744	0.0758047	0.589108	0.076213	0.587421	0.0757981	0.604143	0.0758347	0.592318	0.0761211
																0.627689	0.0797541	0.630671	0.0799215	0.627689	0.0798975			0.573929	0.0744709	0.571794	0.0744143	0.579349	0.0751706	0.594273	0.0748756	0.594973	0.0754702	0.593317	0.0758296	0.578273	0.0755307	0.606239	0.0759787	0.589163	0.0758409	0.590212	0.0760968	0.588115	0.0757137	0.605647	0.0758945	0.593027	0.0760338
																0.630671	0.0800655	0.633658	0.0802324	0.630671	0.0802094			0.57485	0.0743999	0.572791	0.0743379	0.580551	0.0750765	0.59537	0.0748022	0.59639	0.0753622	0.595559	0.0758338	0.57923	0.0754593	0.607775	0.0760122	0.590687	0.0759062	0.59165	0.0759973	0.589016	0.075654	0.607263	0.0759865	0.593948	0.0759706
																0.633658	0.0803769	0.636651	0.0805433	0.633658	0.0805214			0.575965	0.0743505	0.573997	0.0742853	0.582008	0.0750059	0.596697	0.0747588	0.598107	0.0752804	0.597897	0.0758623	0.58039	0.0754126	0.609376	0.0760691	0.592274	0.0759989	0.593393	0.0759163	0.590105	0.0756201	0.608946	0.0761083	0.595062	0.0759329
																0.636651	0.0806884	0.639649	0.0808543	0.636651	0.0808335			0.577252	0.0743235	0.575391	0.0742578	0.583691	0.0749603	0.59823	0.0747461	0.600091	0.0752264	0.600266	0.0759143	0.581728	0.0753916	0.610998	0.076148	0.593882	0.0761165	0.595408	0.0758555	0.591363	0.0756125	0.610649	0.0762566	0.596348	0.0759213
																0.639649	0.081	0.641056	0.081	0.63825	0.081			0.578687	0.0743197	0.576944	0.0742558	0.585568	0.0749404	0.599937	0.0747645	0.602302	0.0752011	0.602602	0.0759883	0.583219	0.0753967	0.612597	0.0762466	0.595466	0.0762558	0.597655	0.0758161	0.592763	0.0756316	0.612328	0.0764272	0.597781	0.0759361
																0.639649	0.081	ConcBand	ConcBand	ConcBand	ConcBand			0.580242	0.074339	0.578626	0.0742793	0.587601	0.0749468	0.601785	0.0748136	0.604699	0.0752051	0.604842	0.0760823	0.584835	0.0754277	0.61413	0.0763623	0.596983	0.0764129	0.60009	0.0757987	0.59428	0.0756769	0.613935	0.0766157	0.599333	0.0759769
																IsoLine	IsoLine							0.581885	0.074381	0.580405	0.0743279	0.589752	0.0749792	0.60374	0.0748924	0.607233	0.0752383	0.606925	0.0761938	0.586542	0.0754842	0.615554	0.0764919	0.598392	0.0765835	0.602667	0.0758037	0.595884	0.0757475	0.615427	0.0768167	0.600973	0.076043
																								0.583586	0.074445	0.582245	0.0744007	0.591978	0.0750371	0.605762	0.0749994	0.609857	0.0753	0.608793	0.0763198	0.588309	0.0755649	0.61683	0.0766319	0.599654	0.0767631	0.605334	0.0758311	0.597543	0.0758421	0.616764	0.0770249	0.60267	0.0761331
																								0.585311	0.0745296	0.584112	0.0744962	0.594235	0.0751193	0.607812	0.0751325	0.612519	0.0753891	0.610395	0.0764567	0.590101	0.0756683	0.617924	0.0767784	0.600736	0.0769467	0.608041	0.0758804	0.599224	0.0759588	0.617908	0.0772345	0.604391	0.0762455
																								0.587027	0.0746333	0.585969	0.0746125	0.596481	0.0752242	0.609851	0.0752892	0.615166	0.0755038	0.611688	0.0766009	0.591883	0.0757923	0.618806	0.0769275	0.601606	0.0771293	0.610734	0.0759504	0.600897	0.0760953	0.618829	0.0774399	0.606102	0.0763779
																								0.5887	0.074754	0.587779	0.0747475	0.598672	0.0753498	0.611838	0.0754663	0.617749	0.0756419	0.612637	0.0767484	0.59362	0.0759347	0.619452	0.0770751	0.602242	0.0773059	0.613361	0.0760399	0.602526	0.076249	0.619502	0.0776353	0.60777	0.0765278
																								0.590298	0.0748894	0.589507	0.0748985	0.600764	0.0754937	0.613736	0.0756604	0.620215	0.0758007	0.613216	0.0768952	0.595279	0.0760926	0.619844	0.0772172	0.602627	0.0774717	0.61587	0.0761472	0.604082	0.0764169	0.619908	0.0778156	0.609362	0.0766922
																								0.591789	0.0750369	0.59112	0.0750625	0.602717	0.0756529	0.615506	0.0758678	0.622518	0.075977	0.613409	0.0770373	0.596826	0.0762629	0.619972	0.0773499	0.60275	0.0776222	0.618214	0.0762702	0.605534	0.0765957	0.620036	0.0779758	0.610848	0.076868
																								0.593144	0.0751935	0.592587	0.0752363	0.604493	0.0758245	0.617115	0.0760844	0.624612	0.0761676			0.598233	0.0764423					0.620346	0.0764063	0.606853	0.076782			0.612198	0.0770518
																								0.594338	0.0753562	0.593878	0.0754167	0.606058	0.0760051	0.618532	0.076306	0.626458	0.0763686			0.599472	0.0766273					0.622225	0.0765531	0.608015	0.0769721			0.613387	0.0772399
																								0.595347	0.0755219	0.594969	0.0756	0.607381	0.0761911	0.619728	0.0765283	0.628017	0.0765762			0.600518	0.0768144					0.623815	0.0767077	0.608995	0.0771623			0.614391	0.0774287
																								0.59615	0.0756873	0.595839	0.0757826	0.608436	0.076379	0.62068	0.0767469	0.629262	0.0767863			0.601352	0.0769998					0.625083	0.076867	0.609775	0.077349			0.61519	0.0776145
																								0.596734	0.0758492	0.59647	0.0759611	0.609202	0.0765651	0.621371	0.0769576	0.630166	0.0769948			0.601956	0.07718					0.626007	0.0770279	0.610341	0.0775284			0.615769	0.0777937
																								0.597086	0.0760045	0.59685	0.076132	0.609665	0.0767458	0.621786	0.0771564	0.630713	0.0771977			0.60232	0.0773515					0.626567	0.0771874	0.61068	0.0776971			0.616117	0.0779629
																								0.597199	0.0761501	0.596972	0.0762919	0.609817	0.0769176	0.621917	0.0773392	0.630892	0.077391			0.602436	0.0775109					0.626753	0.0773423	0.610787	0.0778518			0.616227	0.0781187
[truncated: 2 more columns]

## Sheet: PlotDat9
Source sheet	entregar - entregar	380	1.72252e-06	460	0	380	0
Plot name	ProbDens0	380.1	1.74093e-06	465	0	579.9	0
Plot Type	16	380.2	1.75953e-06	465	6
1st free col	9	380.3	1.77832e-06	460	6
Sigma Level	2	380.4	1.79731e-06	460	0
Absolute Errs	FALSE	380.5	1.8165e-06	ErrBox	ErrBox
Symbol Type	1	380.6	1.83589e-06	465	0
Inverse Plot	FALSE	380.7	1.85548e-06	470	0
Color Plot	TRUE	380.8	1.87528e-06	470	4
3D plot	FALSE	380.9	1.89529e-06	465	4
Linear	FALSE	381	1.9155e-06	465	0
Data Range	CR72:CS133	381.1	1.93593e-06	ErrBox	ErrBox
Filled Symbols	FALSE	381.2	1.95657e-06	470	0
ConcAge	FALSE	381.3	1.97743e-06	475	0
ConcSwap	FALSE	381.4	1.9985e-06	475	12
1st Symbol-row	1	381.5	2.0198e-06	470	12
		381.6	2.04132e-06	470	0
		381.7	2.06306e-06	ErrBox	ErrBox
		381.8	2.10119e-06	475	0
		381.9	2.12373e-06	480	0
		382	2.1465e-06	480	14
		382.1	2.16952e-06	475	14
		382.2	2.19278e-06	475	0
		382.3	2.23277e-06	ErrBox	ErrBox
		382.4	2.25694e-06	480	0
		382.5	2.28138e-06	485	0
		382.6	2.30609e-06	485	8
		382.7	2.33106e-06	480	8
		382.8	2.35631e-06	480	0
		382.9	2.38183e-06	ErrBox	ErrBox
		383	2.40763e-06	485	0
		383.1	2.43371e-06	490	0
		383.2	2.46008e-06	490	7
		383.3	2.48673e-06	485	7
		383.4	2.53013e-06	485	0
		383.5	2.55773e-06	ErrBox	ErrBox
		383.6	2.58564e-06	490	0
		383.7	2.61385e-06	495	0
		383.8	2.64237e-06	495	5
		383.9	2.68774e-06	490	5
		384	2.71732e-06	490	0
		384.1	2.74723e-06	ErrBox	ErrBox
		384.2	2.77748e-06	495	0
		384.3	2.80807e-06	500	0
		384.4	2.83901e-06	500	5
		384.5	2.8703e-06	495	5
		384.6	2.90194e-06	495	0
		384.7	2.93394e-06	ErrBox	ErrBox
		384.8	2.9663e-06	500	0
		384.9	2.99903e-06	505	0
		385	3.03213e-06	505	1
		385.1	3.06561e-06	500	1
		385.2	3.09946e-06	500	0
		385.3	3.13371e-06	ErrBox	ErrBox
		385.4	3.16834e-06
		385.5	3.20336e-06
		385.6	3.23879e-06
		385.7	3.27462e-06
		385.8	3.31085e-06
		385.9	3.34751e-06
		386	3.38458e-06
		386.1	3.42207e-06
		386.2	3.46e-06
		386.3	3.49835e-06
		386.4	3.53715e-06
		386.5	3.5764e-06
		386.6	3.61609e-06
		386.7	3.65624e-06
		386.8	3.69685e-06
		386.9	3.73793e-06
		387	3.77949e-06
		387.1	3.82152e-06
		387.2	3.86404e-06
		387.3	3.90704e-06
		387.4	3.95055e-06
		387.5	3.99456e-06
		387.6	4.03907e-06
		387.7	4.08411e-06
		387.8	4.12966e-06
		387.9	4.17574e-06
		388	4.22236e-06
		388.1	4.26952e-06
		388.2	4.31723e-06
		388.3	4.36549e-06
		388.4	4.41431e-06
		388.5	4.47986e-06
		388.6	4.54644e-06
		388.7	4.5978e-06
		388.8	4.64976e-06
		388.9	4.70235e-06
		389	4.75556e-06
		389.1	4.8094e-06
		389.2	4.86388e-06
		389.3	4.91901e-06
		389.4	4.9748e-06
		389.5	5.03126e-06
		389.6	5.08838e-06
		389.7	5.1462e-06
		389.8	5.2047e-06
		389.9	5.2639e-06
		390	5.32381e-06
		390.1	5.38445e-06
		390.2	5.4458e-06
		390.3	5.5079e-06
		390.4	5.57074e-06
		390.5	5.63434e-06
		390.6	5.6987e-06
		390.7	5.76384e-06
		390.8	5.82976e-06
		390.9	5.89648e-06
		391	5.96401e-06
		391.1	6.03235e-06
		391.2	6.10152e-06
		391.3	6.17152e-06
		391.4	6.24238e-06
		391.5	6.31409e-06
		391.6	6.40292e-06
		391.7	6.47684e-06
		391.8	6.55166e-06
		391.9	6.6274e-06
		392	6.70407e-06
		392.1	6.78167e-06
		392.2	6.86023e-06
		392.3	6.93976e-06
		392.4	7.02026e-06
		392.5	7.10175e-06
		392.6	7.18425e-06
		392.7	7.26776e-06
		392.8	7.3523e-06
		392.9	7.43789e-06
		393	7.52453e-06
		393.1	7.61224e-06
		393.2	7.70104e-06
		393.3	7.79094e-06
		393.4	7.88195e-06
		393.5	7.97408e-06
		393.6	8.08352e-06
		393.7	8.17836e-06
		393.8	8.27439e-06
		393.9	8.37161e-06
		394	8.47005e-06
		394.1	8.56971e-06
		394.2	8.67063e-06
		394.3	8.7728e-06
		394.4	8.87625e-06
		394.5	8.981e-06
		394.6	9.08706e-06
		394.7	9.19445e-06
		394.8	9.31967e-06
		394.9	9.43025e-06
		395	9.54223e-06
		395.1	9.65563e-06
		395.2	9.77046e-06
		395.3	9.88675e-06
		395.4	1.00045e-05
		395.5	1.01238e-05
		395.6	1.02445e-05
		395.7	1.03668e-05
		395.8	1.04906e-05
		395.9	1.06161e-05
		396	1.07431e-05
		396.1	1.08717e-05
		396.2	1.1002e-05
		396.3	1.11339e-05
		396.4	1.12675e-05
		396.5	1.14028e-05
		396.6	1.15398e-05
		396.7	1.16786e-05
		396.8	1.18191e-05
		396.9	1.19614e-05
		397	1.21056e-05
		397.1	1.22678e-05
		397.2	1.24161e-05
		397.3	1.25662e-05
		397.4	1.27183e-05
		397.5	1.28723e-05
		397.6	1.30283e-05
		397.7	1.31863e-05
		397.8	1.33463e-05
		397.9	1.35084e-05
		398	1.36726e-05
		398.1	1.38389e-05
		398.2	1.40073e-05
		398.3	1.41779e-05
		398.4	1.43506e-05
		398.5	1.45256e-05
		398.6	1.47029e-05
		398.7	1.48824e-05
		398.8	1.50643e-05
		398.9	1.52485e-05
		399	1.54351e-05
		399.1	1.5624e-05
		399.2	1.58155e-05
		399.3	1.60094e-05
		399.4	1.62057e-05
		399.5	1.64047e-05
		399.6	1.66062e-05
		399.7	1.68103e-05
		399.8	1.7017e-05
		399.9	1.72264e-05
		400	1.74385e-05
		400.1	1.76534e-05
		400.2	1.7871e-05
		400.3	1.8108e-05
		400.4	1.83318e-05
		400.5	1.85585e-05
		400.6	1.87881e-05
		400.7	1.90207e-05
		400.8	1.92563e-05
		400.9	1.9495e-05
		401	1.97367e-05
		401.1	1.99816e-05
		401.2	2.02297e-05
		401.3	2.0481e-05
		401.4	2.07356e-05
		401.5	2.09934e-05
		401.6	2.12546e-05
		401.7	2.15192e-05
		401.8	2.17873e-05
		401.9	2.20588e-05
		402	2.23338e-05
		402.1	2.26124e-05
		402.2	2.29109e-05
		402.3	2.31973e-05
		402.4	2.34874e-05
		402.5	2.37812e-05
		402.6	2.40789e-05
		402.7	2.43805e-05
		402.8	2.46859e-05
		402.9	2.49954e-05
		403	2.53088e-05
		403.1	2.56264e-05
		403.2	2.5948e-05
		403.3	2.62739e-05
		403.4	2.66039e-05
		403.5	2.69383e-05
		403.6	2.7277e-05
		403.7	2.76201e-05
		403.8	2.79676e-05
		403.9	2.83197e-05
		404	2.86763e-05
		404.1	2.90376e-05
		404.2	2.94035e-05
		404.3	2.97742e-05
		404.4	3.01497e-05
		404.5	3.05301e-05
		404.6	3.09153e-05
		404.7	3.13056e-05
		404.8	3.1701e-05
		404.9	3.21014e-05
		405	3.25071e-05
		405.1	3.29179e-05
		405.2	3.33341e-05
		405.3	3.37557e-05
		405.4	3.41828e-05
		405.5	3.46153e-05
		405.6	3.50534e-05
		405.7	3.54972e-05
		405.8	3.59467e-05
		405.9	3.64021e-05
		406	3.68632e-05
		406.1	3.73304e-05
		406.2	3.78035e-05
		406.3	3.82828e-05
		406.4	3.87682e-05
		406.5	3.92598e-05
		406.6	3.97578e-05
		406.7	4.02622e-05
		406.8	4.07894e-05
		406.9	4.13073e-05
		407	4.18482e-05
		407.1	4.238e-05
		407.2	4.29187e-05
		407.3	4.34643e-05
		407.4	4.40168e-05
		407.5	4.45765e-05
		407.6	4.51434e-05
		407.7	4.57175e-05
		407.8	4.6299e-05
		407.9	4.69042e-05
		408	4.75012e-05
		408.1	4.81058e-05
		408.2	4.87182e-05
		408.3	4.93384e-05
		408.4	4.99666e-05
		408.5	5.06027e-05
		408.6	5.1247e-05
		408.7	5.18995e-05
		408.8	5.25603e-05
		408.9	5.32296e-05
		409	5.39073e-05
		409.1	5.45937e-05
		409.2	5.52888e-05
		409.3	5.60089e-05
		409.4	5.67223e-05
		409.5	5.74446e-05
		409.6	5.81762e-05
		409.7	5.8917e-05
		409.8	5.96671e-05
		409.9	6.04268e-05
		410	6.12123e-05
		410.1	6.19918e-05
		410.2	6.27812e-05
		410.3	6.35806e-05
		410.4	6.439e-05
		410.5	6.52097e-05
		410.6	6.60396e-05
		410.7	6.68801e-05
		410.8	6.7731e-05
		410.9	6.85927e-05
		411	6.94652e-05
		411.1	7.03649e-05
		411.2	7.12599e-05
		411.3	7.21661e-05
		411.4	7.30836e-05
		411.5	7.40127e-05
		411.6	7.49534e-05
		411.7	7.59058e-05
		411.8	7.687e-05
		411.9	7.78464e-05
		412	7.88348e-05
		412.1	7.98356e-05
		412.2	8.08488e-05
		412.3	8.18746e-05
		412.4	8.29131e-05
		412.5	8.39645e-05
		412.6	8.50289e-05
		412.7	8.61065e-05
		412.8	8.72137e-05
		412.9	8.83186e-05
		413	8.94371e-05
		413.1	9.05694e-05
		413.2	9.17157e-05
		413.3	9.28761e-05
		413.4	9.40507e-05
		413.5	9.52397e-05
		413.6	9.64434e-05
		413.7	9.76617e-05
		413.8	9.8895e-05
		413.9	0.000100143
		414	0.000101424
		414.1	0.000102703
		414.2	0.000103998
		414.3	0.00010531
		414.4	0.000106637
		414.5	0.00010798
		414.6	0.000109356
		414.7	0.000110732
		414.8	0.000112125
		414.9	0.000113535
		415	0.000114962
		415.1	0.000116407
		415.2	0.000117868
		415.3	0.000119348
		415.4	0.000120845
		415.5	0.00012236
		415.6	0.000123894
		415.7	0.000125445
		415.8	0.000127016
		415.9	0.000128605
		416	0.000130213
		416.1	0.00013184
		416.2	0.000133487
		416.3	0.00013517
		416.4	0.000136856
		416.5	0.000138563
		416.6	0.00014029
		416.7	0.000142037
		416.8	0.000143822
		416.9	0.000145612
		417	0.000147422
		417.1	0.000149271
		417.2	0.000151125
		417.3	0.000153001
		417.4	0.000154916
		417.5	0.000156837
		417.6	0.00015878
		417.7	0.000160746
		417.8	0.000162752
		417.9	0.000164765
		418	0.000166802
		418.1	0.000168862
		418.2	0.000170946
		418.3	0.000173055
		418.4	0.000175188
		418.5	0.000177362
		418.6	0.000179545
		418.7	0.000181754
		418.8	0.000183988
		418.9	0.000186248
		419	0.000188533
		419.1	0.000190846
		419.2	0.000193201
		419.3	0.000195567
		419.4	0.000197961
		419.5	0.000200398
		419.6	0.000202847
		419.7	0.000205324
		419.8	0.000207829
		419.9	0.000210363
		420	0.000212926
		420.1	0.000215518
		420.2	0.000218139
		420.3	0.00022079
		420.4	0.00022347
		420.5	0.000226198
		420.6	0.00022894
		420.7	0.000231713
		420.8	0.000234518
		420.9	0.000237353
		421	0.000240221
		421.1	0.000243121
		421.2	0.000246053
		421.3	0.000249018
		421.4	0.000252016
		421.5	0.000255048
		421.6	0.000258113
		421.7	0.000261212
		421.8	0.000264346
		421.9	0.000267514
		422	0.000270734
		422.1	0.000273973
		422.2	0.000277248
		422.3	0.000280576
		422.4	0.00028394
		422.5	0.000287326
		422.6	0.000290748
		422.7	0.000294209
		422.8	0.000297707
		422.9	0.000301243
		423	0.000304818
		423.1	0.000308448
		423.2	0.000312102
		423.3	0.000315812
		423.4	0.000319546
		423.5	0.00032332
		423.6	0.000327136
		423.7	0.000330992
		423.8	0.00033489
		423.9	0.00033883
		424	0.000342813
		424.1	0.000346838
		424.2	0.000350906
		424.3	0.000355018
		424.4	0.000359174
		424.5	0.000363374
		424.6	0.000367619
		424.7	0.000371909
		424.8	0.000376245
		424.9	0.000380626
		425	0.000385054
		425.1	0.000389529
		425.2	0.000394051
		425.3	0.000398621
		425.4	0.000403239
		425.5	0.000407906
		425.6	0.000412621
		425.7	0.000417386
		425.8	0.000422201
		425.9	0.000427082
		426	0.000431999
		426.1	0.000436966
		426.2	0.000441986
		426.3	0.000447057
		426.4	0.000452182
		426.5	0.000457359
		426.6	0.00046259
		426.7	0.000467874
		426.8	0.000473214
		426.9	0.000478608
		427	0.000484058
		427.1	0.000489563
		427.2	0.000495125
		427.3	0.000500744
		427.4	0.000506437
		427.5	0.000512172
		427.6	0.000517982
		427.7	0.000523834
		427.8	0.000529747
		427.9	0.000535719
		428	0.000541752
		428.1	0.000547846
		428.2	0.000554001
		428.3	0.000560219
		428.4	0.000566499
		428.5	0.000572842
		428.6	0.000579249
		428.7	0.00058572
		428.8	0.000592256
		428.9	0.000598858
		429	0.000605525
		429.1	0.000612258
		429.2	0.000619076
		429.3	0.000625945
		429.4	0.000632882
		429.5	0.000639905
		429.6	0.000646981
		429.7	0.000654127
		429.8	0.000661344
		429.9	0.000668632
		430	0.000675992
		430.1	0.000683424
		430.2	0.000690929
		430.3	0.000698524
		430.4	0.000706178
		430.5	0.000713906
		430.6	0.00072171
		430.7	0.00072959
		430.8	0.000737547
		430.9	0.000745581
		431	0.000753693
		431.1	0.000761884
		431.2	0.000770154
		431.3	0.000778504
		431.4	0.000786935
		431.5	0.000795447
		431.6	0.000804058
		431.7	0.000812751
		431.8	0.000821513
		431.9	0.000830358
		432	0.000839289
		432.1	0.000848305
		432.2	0.000857407
		432.3	0.000866596
		432.4	0.000875872
		432.5	0.000885237
		432.6	0.000894692
		432.7	0.000904235
		432.8	0.00091387
		432.9	0.000923596
		433	0.000933413
		433.1	0.000943324
		433.2	0.000953328
		433.3	0.000963427
		433.4	0.00097362
		433.5	0.00098391
		433.6	0.000994296
		433.7	0.00100478
		433.8	0.00101536
		433.9	0.00102604
		434	0.00103682
		434.1	0.0010477
		434.2	0.00105869
		434.3	0.00106977
		434.4	0.00108096
		434.5	0.00109225
		434.6	0.00110365
		434.7	0.00111515
		434.8	0.00112676
		434.9	0.00113848
		435	0.0011503
		435.1	0.00116224
		435.2	0.00117428
		435.3	0.00118643
		435.4	0.00119872
		435.5	0.0012111
		435.6	0.00122359
		435.7	0.0012362
		435.8	0.00124892
		435.9	0.00126176
		436	0.00127472
		436.1	0.00128779
		436.2	0.00130099
		436.3	0.0013143
		436.4	0.00132774
		436.5	0.00134131
		436.6	0.001355
		436.7	0.0013688
		436.8	0.00138273
		436.9	0.00139679
		437	0.00141098
		437.1	0.00142529
		437.2	0.00143973
		437.3	0.0014543
		437.4	0.00146902
		437.5	0.00148386
		437.6	0.00149883
		437.7	0.00151395
		437.8	0.00152921
		437.9	0.00154458
		438	0.0015601
		438.1	0.00157575
		438.2	0.00159155
		438.3	0.00160748
		438.4	0.00162356
		438.5	0.00163978
		438.6	0.00165615
		438.7	0.00167268
		438.8	0.00168934
		438.9	0.00170615
		439	0.0017231
		439.1	0.00174021
		439.2	0.00175747
		439.3	0.00177488
		439.4	0.00179245
		439.5	0.00181017
		439.6	0.00182805
		439.7	0.00184608
		439.8	0.00186428
		439.9	0.00188263
		440	0.00190115
		440.1	0.00191983
		440.2	0.00193867
		440.3	0.00195768
		440.4	0.00197686
		440.5	0.0019962
		440.6	0.00201571
		440.7	0.0020354
		440.8	0.00205525
		440.9	0.0020753
		441	0.00209551
		441.1	0.00211589
		441.2	0.00213646
		441.3	0.0021572
		441.4	0.00217812
		441.5	0.00219922
		441.6	0.00222051
		441.7	0.00224198
		441.8	0.00226363
		441.9	0.00228547
		442	0.00230752
		442.1	0.00232975
		442.2	0.00235216
		442.3	0.00237477
		442.4	0.00239757
		442.5	0.00242058
		442.6	0.00244378
		442.7	0.00246717
		442.8	0.00249079
		442.9	0.00251459
		443	0.0025386
		443.1	0.00256282
		443.2	0.00258724
		443.3	0.00261187
		443.4	0.00263671
		443.5	0.00266177
		443.6	0.00268704
		443.7	0.00271252
		443.8	0.00273822
		443.9	0.00276414
		444	0.00279028
		444.1	0.00281665
		444.2	0.00284324
		444.3	0.00287005
		444.4	0.00289709
		444.5	0.00292436
		444.6	0.00295186
		444.7	0.0029796
		444.8	0.00300757
		444.9	0.00303577
		445	0.00306421
		445.1	0.0030929
		445.2	0.00312182
		445.3	0.00315099
		445.4	0.0031804
		445.5	0.00321006
		445.6	0.00323997
		445.7	0.00327012
		445.8	0.00330054
		445.9	0.0033312
		446	0.00336212
		446.1	0.0033933
		446.2	0.00342474
		446.3	0.00345644
		446.4	0.0034884
		446.5	0.00352063
		446.6	0.00355313
		446.7	0.00358589
		446.8	0.00361893
		446.9	0.00365226
		447	0.00368586
		447.1	0.00371972
		447.2	0.00375386
		447.3	0.00378828
		447.4	0.00382299
		447.5	0.00385798
		447.6	0.00389325
		447.7	0.00392882
		447.8	0.00396467
		447.9	0.00400082
		448	0.00403726
		448.1	0.004074
		448.2	0.00411104
		448.3	0.00414837
		448.4	0.00418601
		448.5	0.00422395
		448.6	0.0042622
		448.7	0.00430076
		448.8	0.00433963
		448.9	0.00437881
		449	0.00441832
		449.1	0.00445813
		449.2	0.00449826
		449.3	0.00453871
		449.4	0.00457948
		449.5	0.00462057
		449.6	0.00466199
		449.7	0.00470374
		449.8	0.00474582
		449.9	0.00478823
		450	0.00483097
		450.1	0.00487405
		450.2	0.00491747
		450.3	0.00496123
		450.4	0.00500533
		450.5	0.00504977
		450.6	0.00509455
		450.7	0.00513969
		450.8	0.00518517
		450.9	0.00523101
		451	0.00527719
		451.1	0.00532374
		451.2	0.00537063
		451.3	0.00541789
		451.4	0.00546551
		451.5	0.00551349
		451.6	0.00556185
		451.7	0.00561056
		451.8	0.00565963
		451.9	0.00570908
		452	0.00575889
		452.1	0.00580908
		452.2	0.00585965
		452.3	0.00591059
		452.4	0.0059619
		452.5	0.0060136
		452.6	0.00606567
		452.7	0.00611813
		452.8	0.00617097
		452.9	0.0062242
		453	0.00627782
		453.1	0.00633182
		453.2	0.00638621
		453.3	0.006441
		453.4	0.00649617
		453.5	0.00655174
		453.6	0.00660771
		453.7	0.00666407
		453.8	0.00672083
		453.9	0.00677799
		454	0.00683555
		454.1	0.00689351
		454.2	0.00695187
		454.3	0.00701063
		454.4	0.0070698
		454.5	0.00712939
		454.6	0.00718938
		454.7	0.00724977
		454.8	0.00731056
		454.9	0.00737177
		455	0.00743338
		455.1	0.00749541
		455.2	0.00755785
		455.3	0.00762069
		455.4	0.00768395
		455.5	0.00774763
		455.6	0.00781171
		455.7	0.00787621
		455.8	0.00794112
		455.9	0.00800645
		456	0.00807218
		456.1	0.00813834
		456.2	0.0082049
		456.3	0.00827189
		456.4	0.00833928
		456.5	0.00840709
		456.6	0.00847531
		456.7	0.00854395
		456.8	0.008613
		456.9	0.00868246
		457	0.00875233
		457.1	0.00882261
		457.2	0.00889331
		457.3	0.00896441
		457.4	0.00903593
		457.5	0.00910785
		457.6	0.00918018
		457.7	0.00925291
		457.8	0.00932605
		457.9	0.0093996
		458	0.00947354
		458.1	0.00954789
		458.2	0.00962263
		458.3	0.00969778
		458.4	0.00977332
		458.5	0.00984925
		458.6	0.00992558
		458.7	0.0100023
		458.8	0.0100794
		458.9	0.0101569
		459	0.0102348
		459.1	0.010313
		459.2	0.0103916
		459.3	0.0104706
		459.4	0.01055
		459.5	0.0106298
		459.6	0.0107099
		459.7	0.0107904
		459.8	0.0108712
		459.9	0.0109524
		460	0.011034
		460.1	0.0111159
		460.2	0.0111981
		460.3	0.0112807
		460.4	0.0113637
		460.5	0.0114469
		460.6	0.0115305
		460.7	0.0116145
		460.8	0.0116987
		460.9	0.0117833
		461	0.0118681
		461.1	0.0119533
		461.2	0.0120388
		461.3	0.0121246
		461.4	0.0122107
		461.5	0.0122971
		461.6	0.0123837
		461.7	0.0124707
		461.8	0.0125579
		461.9	0.0126453
		462	0.012733
		462.1	0.012821
		462.2	0.0129093
		462.3	0.0129977
		462.4	0.0130864
		462.5	0.0131754
		462.6	0.0132645
		462.7	0.0133539
		462.8	0.0134435
		462.9	0.0135332
		463	0.0136232
		463.1	0.0137133
		463.2	0.0138037
		463.3	0.0138942
		463.4	0.0139848
		463.5	0.0140757
		463.6	0.0141666
		463.7	0.0142577
		463.8	0.014349
		463.9	0.0144403
		464	0.0145318
		464.1	0.0146234
		464.2	0.014715
		464.3	0.0148068
		464.4	0.0148986
		464.5	0.0149906
		464.6	0.0150825
		464.7	0.0151745
		464.8	0.0152666
		464.9	0.0153587
		465	0.0154508
		465.1	0.0155429
		465.2	0.0156351
		465.3	0.0157272
		465.4	0.0158193
		465.5	0.0159114
		465.6	0.0160034
		465.7	0.0160954
		465.8	0.0161874
		465.9	0.0162792
		466	0.016371
		466.1	0.0164627
		466.2	0.0165543
		466.3	0.0166458
		466.4	0.0167371
		466.5	0.0168284
		466.6	0.0169195
		466.7	0.0170104
		466.8	0.0171011
		466.9	0.0171917
		467	0.0172821
		467.1	0.0173723
		467.2	0.0174623
		467.3	0.017552
		467.4	0.0176416
		467.5	0.0177308
		467.6	0.0178198
		467.7	0.0179086
		467.8	0.017997
		467.9	0.0180852
		468	0.0181731
		468.1	0.0182606
		468.2	0.0183478
		468.3	0.0184347
		468.4	0.0185212
		468.5	0.0186074
		468.6	0.0186932
		468.7	0.0187786
		468.8	0.0188636
		468.9	0.0189482
		469	0.0190324
		469.1	0.0191161
		469.2	0.0191994
		469.3	0.0192822
		469.4	0.0193646
		469.5	0.0194465
		469.6	0.0195279
		469.7	0.0196088
		469.8	0.0196891
		469.9	0.019769
		470	0.0198483
		470.1	0.0199271
		470.2	0.0200053
		470.3	0.0200829
		470.4	0.02016
		470.5	0.0202364
		470.6	0.0203123
		470.7	0.0203876
		470.8	0.0204622
		470.9	0.0205362
		471	0.0206095
		471.1	0.0206822
		471.2	0.0207543
		471.3	0.0208256
		471.4	0.0208963
		471.5	0.0209663
		471.6	0.0210355
		471.7	0.0211041
		471.8	0.0211719
		471.9	0.021239
		472	0.0213054
		472.1	0.021371
		472.2	0.0214358
		472.3	0.0214999
		472.4	0.0215632
		472.5	0.0216257
		472.6	0.0216874
		472.7	0.0217483
		472.8	0.0218085
		472.9	0.0218677
		473	0.0219262
		473.1	0.0219838
		473.2	0.0220406
		473.3	0.0220966
		473.4	0.0221517
		473.5	0.0222059
		473.6	0.0222593
		473.7	0.0223117
		473.8	0.0223633
		473.9	0.0224141
		474	0.0224639
		474.1	0.0225128
		474.2	0.0225609
		474.3	0.022608
		474.4	0.0226542
		474.5	0.0226995
		474.6	0.0227438
		474.7	0.0227873
		474.8	0.0228298
		474.9	0.0228713
		475	0.022912
		475.1	0.0229516
		475.2	0.0229904
		475.3	0.0230282
		475.4	0.023065
		475.5	0.0231009
		475.6	0.0231358
		475.7	0.0231698
		475.8	0.0232028
		475.9	0.0232348
		476	0.0232658
		476.1	0.0232959
		476.2	0.0233251
		476.3	0.0233532
		476.4	0.0233804
		476.5	0.0234066
		476.6	0.0234318
		476.7	0.0234561
		476.8	0.0234793
		476.9	0.0235016
		477	0.0235229
		477.1	0.0235433
		477.2	0.0235627
		477.3	0.0235811
		477.4	0.0235985
		477.5	0.0236149
		477.6	0.0236304
		477.7	0.0236449
		477.8	0.0236584
		477.9	0.023671
		478	0.0236826
		478.1	0.0236932
		478.2	0.0237029
		478.3	0.0237116
		478.4	0.0237194
		478.5	0.0237262
		478.6	0.023732
		478.7	0.0237369
		478.8	0.0237409
		478.9	0.0237439
		479	0.023746
		479.1	0.0237471
		479.2	0.0237473
		479.3	0.0237466
		479.4	0.0237449
		479.5	0.0237423
		479.6	0.0237388
		479.7	0.0237344
		479.8	0.0237291
		479.9	0.0237229
		480	0.0237157
		480.1	0.0237077
		480.2	0.0236988
		480.3	0.023689
		480.4	0.0236783
		480.5	0.0236668
		480.6	0.0236543
		480.7	0.023641
		480.8	0.0236269
		480.9	0.0236118
		481	0.023596
		481.1	0.0235792
		481.2	0.0235617
		481.3	0.0235433
		481.4	0.0235241
		481.5	0.023504
		481.6	0.0234831
		481.7	0.0234615
		481.8	0.023439
		481.9	0.0234157
		482	0.0233916
		482.1	0.0233667
		482.2	0.0233411
		482.3	0.0233147
		482.4	0.0232875
		482.5	0.0232595
		482.6	0.0232308
		482.7	0.0232013
		482.8	0.0231711
		482.9	0.0231401
		483	0.0231084
		483.1	0.0230759
		483.2	0.0230428
		483.3	0.0230089
		483.4	0.0229743
		483.5	0.0229391
		483.6	0.0229031
		483.7	0.0228664
		483.8	0.022829
		483.9	0.022791
		484	0.0227523
		484.1	0.0227129
		484.2	0.0226729
		484.3	0.0226322
		484.4	0.0225908
		484.5	0.0225488
		484.6	0.0225062
		484.7	0.022463
		484.8	0.0224191
		484.9	0.0223746
		485	0.0223295
		485.1	0.0222838
		485.2	0.0222374
		485.3	0.0221905
		485.4	0.022143
		485.5	0.022095
		485.6	0.0220463
		485.7	0.0219971
		485.8	0.0219473
		485.9	0.0218969
		486	0.021846
		486.1	0.0217945
		486.2	0.0217425
		486.3	0.02169
		486.4	0.0216369
		486.5	0.0215833
		486.6	0.0215292
		486.7	0.0214746
		486.8	0.0214194
		486.9	0.0213638
		487	0.0213077
		487.1	0.021251
		487.2	0.0211939
		487.3	0.0211363
		487.4	0.0210782
		487.5	0.0210197
		487.6	0.0209606
		487.7	0.0209011
		487.8	0.0208412
		487.9	0.0207808
		488	0.02072
		488.1	0.0206587
		488.2	0.020597
		488.3	0.0205348
		488.4	0.0204723
		488.5	0.0204093
		488.6	0.0203459
		488.7	0.020282
		488.8	0.0202178
		488.9	0.0201532
		489	0.0200882
		489.1	0.0200227
		489.2	0.0199569
		489.3	0.0198908
		489.4	0.0198242
		489.5	0.0197573
		489.6	0.01969
		489.7	0.0196223
		489.8	0.0195543
		489.9	0.0194859
		490	0.0194172
		490.1	0.0193481
		490.2	0.0192787
		490.3	0.0192089
		490.4	0.0191388
		490.5	0.0190684
		490.6	0.0189977
		490.7	0.0189267
		490.8	0.0188553
		490.9	0.0187836
		491	0.0187117
		491.1	0.0186394
		491.2	0.0185668
		491.3	0.018494
		491.4	0.0184209
		491.5	0.0183474
		491.6	0.0182738
		491.7	0.0181998
		491.8	0.0181256
		491.9	0.0180511
		492	0.0179763
		492.1	0.0179013
		492.2	0.0178261
		492.3	0.0177506
		492.4	0.0176748
		492.5	0.0175989
		492.6	0.0175227
		492.7	0.0174462
		492.8	0.0173696
		492.9	0.0172927
		493	0.0172156
		493.1	0.0171384
		493.2	0.0170609
		493.3	0.0169832
		493.4	0.0169053
		493.5	0.0168272
		493.6	0.016749
		493.7	0.0166706
		493.8	0.0165919
		493.9	0.0165132
		494	0.0164342
		494.1	0.0163551
		494.2	0.0162759
		494.3	0.0161965
		494.4	0.0161169
		494.5	0.0160372
		494.6	0.0159574
		494.7	0.0158774
		494.8	0.0157973
		494.9	0.0157171
		495	0.0156367
		495.1	0.0155563
		495.2	0.0154757
		495.3	0.015395
		495.4	0.0153143
		495.5	0.0152334
		495.6	0.0151525
		495.7	0.0150714
		495.8	0.0149903
		495.9	0.0149091
		496	0.0148279
		496.1	0.0147466
		496.2	0.0146652
		496.3	0.0145837
		496.4	0.0145022
		496.5	0.0144207
		496.6	0.0143391
		496.7	0.0142575
		496.8	0.0141759
		496.9	0.0140942
		497	0.0140125
		497.1	0.0139308
		497.2	0.0138491
		497.3	0.0137674
		497.4	0.0136857
		497.5	0.0136039
		497.6	0.0135222
		497.7	0.0134405
		497.8	0.0133589
		497.9	0.0132772
		498	0.0131956
		498.1	0.013114
		498.2	0.0130324
		498.3	0.0129509
		498.4	0.0128694
		498.5	0.012788
		498.6	0.0127067
		498.7	0.0126254
		498.8	0.0125441
		498.9	0.012463
		499	0.0123819
		499.1	0.0123009
		499.2	0.01222
		499.3	0.0121391
		499.4	0.0120584
		499.5	0.0119778
		499.6	0.0118973
		499.7	0.0118168
		499.8	0.0117365
		499.9	0.0116564
		500	0.0115763
		500.1	0.0114964
		500.2	0.0114166
		500.3	0.0113369
		500.4	0.0112574
		500.5	0.011178
		500.6	0.0110988
		500.7	0.0110197
		500.8	0.0109408
		500.9	0.0108621
		501	0.0107835
		501.1	0.0107051
		501.2	0.0106268
		501.3	0.0105488
		501.4	0.0104709
		501.5	0.0103932
		501.6	0.0103158
		501.7	0.0102385
		501.8	0.0101614
		501.9	0.0100845
		502	0.0100078
		502.1	0.00993137
		502.2	0.00985513
		502.3	0.00977911
		502.4	0.00970332
		502.5	0.00962775
		502.6	0.00955242
		502.7	0.00947732
		502.8	0.00940246
		502.9	0.00932785
		503	0.00925348
		503.1	0.00917936
		503.2	0.0091055
		503.3	0.00903189
		503.4	0.00895855
		503.5	0.00888547
		503.6	0.00881265
		503.7	0.00874011
		503.8	0.00866784
		503.9	0.00859584
		504	0.00852413
		504.1	0.0084527
		504.2	0.00838156
		504.3	0.0083107
		504.4	0.00824014
		504.5	0.00816987
		504.6	0.0080999
		504.7	0.00803023
		504.8	0.00796086
		504.9	0.0078918
		505	0.00782305
		505.1	0.0077546
		505.2	0.00768647
		505.3	0.00761866
		505.4	0.00755116
		505.5	0.00748399
		505.6	0.00741713
		505.7	0.00735061
		505.8	0.0072844
		505.9	0.00721853
		506	0.00715299
		506.1	0.00708778
		506.2	0.00702291
		506.3	0.00695838
		506.4	0.00689418
		506.5	0.00683033
		506.6	0.00676681
		506.7	0.00670364
		506.8	0.00664082
		506.9	0.00657834
		507	0.00651622
		507.1	0.00645444
		507.2	0.00639302
		507.3	0.00633194
		507.4	0.00627123
		507.5	0.00621087
		507.6	0.00615086
		507.7	0.00609121
		507.8	0.00603193
		507.9	0.005973
		508	0.00591443
		508.1	0.00585623
		508.2	0.00579839
		508.3	0.00574091
		508.4	0.0056838
		508.5	0.00562706
		508.6	0.00557068
		508.7	0.00551466
		508.8	0.00545902
		508.9	0.00540374
		509	0.00534883
		509.1	0.00529429
		509.2	0.00524012
		509.3	0.00518632
		509.4	0.00513289
		509.5	0.00507983
		509.6	0.00502714
		509.7	0.00497481
		509.8	0.00492286
		509.9	0.00487128
		510	0.00482008
		510.1	0.00476924
		510.2	0.00471878
		510.3	0.00466867
		510.4	0.00461895
		510.5	0.00456959
		510.6	0.00452061
		510.7	0.004472
		510.8	0.00442376
		510.9	0.00437589
		511	0.00432838
		511.1	0.00428125
		511.2	0.00423448
		511.3	0.00418808
		511.4	0.00414205
		511.5	0.00409638
		511.6	0.00405108
		511.7	0.00400614
		511.8	0.00396157
		511.9	0.00391737
		512	0.00387352
		512.1	0.00383004
		512.2	0.00378692
		512.3	0.00374415
		512.4	0.00370175
		512.5	0.00365971
		512.6	0.00361802
		512.7	0.00357669
		512.8	0.00353572
		512.9	0.0034951
		513	0.00345483
		513.1	0.00341492
		513.2	0.00337536
		513.3	0.00333615
		513.4	0.00329728
		513.5	0.00325876
		513.6	0.00322059
		513.7	0.00318277
		513.8	0.00314529
		513.9	0.00310815
		514	0.00307135
		514.1	0.00303489
		514.2	0.00299877
		514.3	0.00296298
		514.4	0.00292753
		514.5	0.00289242
		514.6	0.00285763
		514.7	0.00282318
		514.8	0.00278906
		514.9	0.00275526
		515	0.00272179
		515.1	0.00268864
		515.2	0.00265582
		515.3	0.0026233
		515.4	0.00259112
		515.5	0.00255926
		515.6	0.00252771
		515.7	0.00249647
		515.8	0.00246555
		515.9	0.00243494
		516	0.00240464
		516.1	0.00237465
		516.2	0.00234494
		516.3	0.00231556
		516.4	0.00228647
		516.5	0.00225769
		516.6	0.00222921
		516.7	0.00220102
		516.8	0.00217313
		516.9	0.00214553
		517	0.00211822
		517.1	0.0020912
		517.2	0.00206446
		517.3	0.00203802
		517.4	0.00201185
		517.5	0.00198597
		517.6	0.00196036
		517.7	0.00193504
		517.8	0.00190999
		517.9	0.00188521
		518	0.0018607
		518.1	0.00183647
		518.2	0.0018125
		518.3	0.00178879
		518.4	0.00176536
		518.5	0.00174218
		518.6	0.00171926
		518.7	0.0016966
		518.8	0.0016742
		518.9	0.00165205
		519	0.00163015
		519.1	0.0016085
		519.2	0.0015871
		519.3	0.00156595
		519.4	0.00154504
		519.5	0.00152437
		519.6	0.00150395
		519.7	0.00148374
		519.8	0.00146379
		519.9	0.00144407
		520	0.00142458
		520.1	0.00140533
		520.2	0.0013863
		520.3	0.0013675
		520.4	0.00134892
		520.5	0.00133057
		520.6	0.00131243
		520.7	0.00129451
		520.8	0.00127681
		520.9	0.00125931
		521	0.00124204
		521.1	0.00122498
		521.2	0.00120812
		521.3	0.00119148
		521.4	0.00117504
		521.5	0.0011588
		521.6	0.00114276
		521.7	0.00112692
		521.8	0.00111128
		521.9	0.00109583
		522	0.00108058
		522.1	0.00106551
		522.2	0.00105064
		522.3	0.00103596
		522.4	0.00102146
		522.5	0.00100714
		522.6	0.000993009
		522.7	0.000979057
		522.8	0.000965283
		522.9	0.000951685
		523	0.000938263
		523.1	0.000925014
		523.2	0.000911936
		523.3	0.000899028
		523.4	0.000886287
		523.5	0.000873712
		523.6	0.000861302
		523.7	0.000849054
		523.8	0.000836967
		523.9	0.000825039
		524	0.000813268
		524.1	0.000801654
		524.2	0.000790193
		524.3	0.000778884
		524.4	0.000767726
		524.5	0.000756717
		524.6	0.000745855
		524.7	0.000735139
		524.8	0.000724566
		524.9	0.000714137
		525	0.000703848
		525.1	0.000693698
		525.2	0.000683686
		525.3	0.000673795
		525.4	0.000664054
		525.5	0.000654446
		525.6	0.00064497
		525.7	0.000635623
		525.8	0.000626405
		525.9	0.000617314
		526	0.000608332
		526.1	0.000599491
		526.2	0.000590772
		526.3	0.000582174
		526.4	0.000573696
		526.5	0.000565336
		526.6	0.000557092
		526.7	0.000548964
		526.8	0.000540949
		526.9	0.000533047
		527	0.000525257
		527.1	0.00051756
		527.2	0.000509988
		527.3	0.000502523
		527.4	0.000495164
		527.5	0.00048791
		527.6	0.000480758
		527.7	0.000473708
		527.8	0.000466759
		527.9	0.000459909
		528	0.000453157
		528.1	0.000446502
		528.2	0.000439943
		528.3	0.000433462
		528.4	0.00042709
		528.5	0.000420811
		528.6	0.000414606
		528.7	0.000408508
		528.8	0.000402498
		528.9	0.000396575
		529	0.000390738
		529.1	0.000384986
		529.2	0.000379318
		529.3	0.000373733
		529.4	0.000368229
		529.5	0.000362806
		529.6	0.000357463
		529.7	0.000352198
		529.8	0.000347011
		529.9	0.0003419
		530	0.000336864
		530.1	0.000331903
		530.2	0.000327015
		530.3	0.000322199
		530.4	0.000317455
		530.5	0.000312781
		530.6	0.000308177
		530.7	0.000303641
		530.8	0.000299173
		530.9	0.000294756
		531	0.00029042
		531.1	0.000286134
		531.2	0.000281928
		531.3	0.000277785
		531.4	0.000273704
		531.5	0.000269685
		531.6	0.000265726
		531.7	0.000261826
		531.8	0.000257986
		531.9	0.000254203
		532	0.000250477
		532.1	0.000246807
		532.2	0.000243193
		532.3	0.000239634
		532.4	0.000236129
		532.5	0.000232676
		532.6	0.000229277
		532.7	0.000225913
		532.8	0.000222616
		532.9	0.00021937
		533	0.000216173
		533.1	0.000213009
		533.2	0.00020991
		533.3	0.000206857
		533.4	0.000203836
		533.5	0.000200877
		533.6	0.000197963
		533.7	0.000195094
		533.8	0.000192253
		533.9	0.000189471
		534	0.000186732
		534.1	0.000184019
		534.2	0.000181364
		534.3	0.00017875
		534.4	0.00017616
		534.5	0.000173626
		534.6	0.000171115
		534.7	0.000168659
		534.8	0.000166241
		534.9	0.00016386
		535	0.000161516
		535.1	0.000159192
		535.2	0.000156919
		535.3	0.000154682
		535.4	0.00015248
		535.5	0.000150295
		535.6	0.000148161
		535.7	0.000146059
		535.8	0.00014399
		535.9	0.000141953
		536	0.000139947
		536.1	0.000137957
		536.2	0.000136014
		536.3	0.000134101
		536.4	0.000132217
		536.5	0.000130362
		536.6	0.000128536
		536.7	0.000126739
		536.8	0.000124953
		536.9	0.000123211
		537	0.000121496
		537.1	0.000119807
		537.2	0.000118145
		537.3	0.000116493
		537.4	0.000114882
		537.5	0.000113296
		537.6	0.000111734
		537.7	0.000110181
		537.8	0.000108668
		537.9	0.000107163
		538	0.000105697
		538.1	0.000104254
		538.2	0.000102832
		538.3	0.000101433
		538.4	0.000100056
		538.5	9.86836e-05
		538.6	9.73326e-05
		538.7	9.60189e-05
		538.8	9.47254e-05
		538.9	9.34362e-05
		539	9.21827e-05
		539.1	9.09486e-05
		539.2	8.97334e-05
		539.3	8.8537e-05
		539.4	8.73589e-05
		539.5	8.6199e-05
		539.6	8.50568e-05
		539.7	8.39322e-05
		539.8	8.28249e-05
		539.9	8.17345e-05
		540	8.06609e-05
		540.1	7.95878e-05
		540.2	7.85473e-05
		540.3	7.75227e-05
		540.4	7.65138e-05
		540.5	7.55203e-05
		540.6	7.45262e-05
		540.7	7.35633e-05
		540.8	7.2615e-05
		540.9	7.16812e-05
		541	7.07616e-05
		541.1	6.98559e-05
		541.2	6.8964e-05
		541.3	6.80856e-05
		541.4	6.72044e-05
		541.5	6.63529e-05
		541.6	6.55141e-05
		541.7	6.46722e-05
		541.8	6.38591e-05
		541.9	6.30582e-05
		542	6.22694e-05
		542.1	6.14924e-05
		542.2	6.07271e-05
		542.3	5.99571e-05
		542.4	5.91989e-05
		542.5	5.84684e-05
		542.6	5.77488e-05
		542.7	5.70241e-05
		542.8	5.63262e-05
		542.9	5.56386e-05
		543	5.49613e-05
		543.1	5.4294e-05
		543.2	5.36366e-05
		543.3	5.29888e-05
		543.4	5.23506e-05
		543.5	5.17219e-05
		543.6	5.10862e-05
		543.7	5.04761e-05
		543.8	4.9875e-05
		543.9	4.92827e-05
		544	4.8699e-05
		544.1	4.81238e-05
		544.2	4.75411e-05
		544.3	4.69832e-05
		544.4	4.64335e-05
		544.5	4.58916e-05
		544.6	4.53576e-05
		544.7	4.48312e-05
		544.8	4.43124e-05
		544.9	4.3801e-05
		545	4.3297e-05
		545.1	4.28001e-05
		545.2	4.23103e-05
		545.3	4.18275e-05
		545.4	4.13515e-05
		545.5	4.08823e-05
		545.6	4.04196e-05
		545.7	3.99635e-05
		545.8	3.95139e-05
		545.9	3.90705e-05
		546	3.86334e-05
		546.1	3.82023e-05
		546.2	3.77773e-05
		546.3	3.73581e-05
		546.4	3.69448e-05
		546.5	3.65373e-05
		546.6	3.61353e-05
		546.7	3.57389e-05
		546.8	3.53479e-05
		546.9	3.49623e-05
		547	3.4582e-05
		547.1	3.42068e-05
		547.2	3.38368e-05
		547.3	3.34561e-05
		547.4	3.30967e-05
		547.5	3.27421e-05
		547.6	3.23923e-05
		547.7	3.20471e-05
		547.8	3.17066e-05
		547.9	3.13548e-05
		548	3.10236e-05
		548.1	3.06968e-05
		548.2	3.03743e-05
		548.3	3.00561e-05
		548.4	2.9742e-05
		548.5	2.94321e-05
		548.6	2.91261e-05
		548.7	2.88242e-05
		548.8	2.85262e-05
		548.9	2.8232e-05
		549	2.79417e-05
		549.1	2.7655e-05
		549.2	2.73721e-05
		549.3	2.70927e-05
		549.4	2.68012e-05
		549.5	2.65295e-05
		549.6	2.62612e-05
		549.7	2.59963e-05
		549.8	2.57348e-05
		549.9	2.54765e-05
		550	2.52214e-05
		550.1	2.49695e-05
		550.2	2.47207e-05
		550.3	2.4475e-05
		550.4	2.42323e-05
		550.5	2.39926e-05
		550.6	2.37558e-05
		550.7	2.35219e-05
		550.8	2.32909e-05
		550.9	2.30626e-05
		551	2.28371e-05
		551.1	2.26143e-05
		551.2	2.23783e-05
		551.3	2.21613e-05
		551.4	2.19469e-05
		551.5	2.1735e-05
		551.6	2.15256e-05
		551.7	2.13187e-05
		551.8	2.11142e-05
		551.9	2.09121e-05
		552	2.06967e-05
		552.1	2.04998e-05
		552.2	2.02896e-05
		552.3	2.00976e-05
		552.4	1.99079e-05
		552.5	1.97204e-05
		552.6	1.95189e-05
		552.7	1.93361e-05
		552.8	1.91554e-05
		552.9	1.89766e-05
		553	1.87998e-05
		553.1	1.8625e-05
		553.2	1.84521e-05
		553.3	1.82811e-05
		553.4	1.8112e-05
		553.5	1.79447e-05
		553.6	1.77792e-05
		553.7	1.76155e-05
		553.8	1.74536e-05
		553.9	1.72934e-05
		554	1.7135e-05
		554.1	1.69782e-05
		554.2	1.68073e-05
		554.3	1.66543e-05
		554.4	1.6503e-05
		554.5	1.63532e-05
		554.6	1.6205e-05
		554.7	1.60583e-05
		554.8	1.58974e-05
		554.9	1.57386e-05
		555	1.55973e-05
		555.1	1.54575e-05
		555.2	1.53191e-05
		555.3	1.51821e-05
		555.4	1.50465e-05
		555.5	1.48962e-05
		555.6	1.47637e-05
		555.7	1.46326e-05
		555.8	1.45028e-05
		555.9	1.43743e-05
		556	1.4247e-05
		556.1	1.4121e-05
		556.2	1.39963e-05
		556.3	1.38727e-05
		556.4	1.37504e-05
		556.5	1.36133e-05
		556.6	1.34939e-05
		556.7	1.33755e-05
		556.8	1.32583e-05
		556.9	1.31423e-05
		557	1.30273e-05
		557.1	1.29134e-05
		557.2	1.28006e-05
		557.3	1.26889e-05
		557.4	1.25782e-05
		557.5	1.24686e-05
		557.6	1.23599e-05
		557.7	1.22523e-05
		557.8	1.21457e-05
		557.9	1.20401e-05
		558	1.19355e-05
		558.1	1.18319e-05
		558.2	1.17292e-05
		558.3	1.16274e-05
		558.4	1.15266e-05
		558.5	1.14267e-05
		558.6	1.13277e-05
		558.7	1.12297e-05
		558.8	1.11325e-05
		558.9	1.10362e-05
		559	1.09408e-05
		559.1	1.08462e-05
		559.2	1.07525e-05
		559.3	1.06597e-05
		559.4	1.05519e-05
		559.5	1.04611e-05
		559.6	1.03711e-05
		559.7	1.02819e-05
		559.8	1.01935e-05
		559.9	1.01059e-05
		560	1.00191e-05
		560.1	9.93304e-06
		560.2	9.84773e-06
		560.3	9.76317e-06
		560.4	9.67934e-06
		560.5	9.59625e-06
		560.6	9.51388e-06
		560.7	9.43223e-06
		560.8	9.35128e-06
		560.9	9.27104e-06
		561	9.1915e-06
		561.1	9.11264e-06
		561.2	9.03446e-06
		561.3	8.95695e-06
		561.4	8.88012e-06
		561.5	8.80394e-06
		561.6	8.72841e-06
		561.7	8.65353e-06
		561.8	8.5793e-06
		561.9	8.50569e-06
		562	8.43271e-06
		562.1	8.36036e-06
		562.2	8.28862e-06
		562.3	8.21749e-06
		562.4	8.13091e-06
		562.5	8.06142e-06
		562.6	7.97667e-06
		562.7	7.90866e-06
		562.8	7.8412e-06
		562.9	7.77431e-06
		563	7.70797e-06
		563.1	7.64218e-06
		563.2	7.57692e-06
		563.3	7.51221e-06
		563.4	7.44803e-06
		563.5	7.38438e-06
		563.6	7.32125e-06
		563.7	7.25864e-06
		563.8	7.19654e-06
		563.9	7.13495e-06
		564	7.07387e-06
		564.1	7.01328e-06
		564.2	6.9532e-06
		564.3	6.87764e-06
		564.4	6.80327e-06
		564.5	6.72948e-06
		564.6	6.6726e-06
		564.7	6.61615e-06
		564.8	6.56014e-06
		564.9	6.50457e-06
		565	6.44943e-06
		565.1	6.39471e-06
		565.2	6.34042e-06
		565.3	6.28656e-06
		565.4	6.23311e-06
		565.5	6.18007e-06
		565.6	6.11147e-06
		565.7	6.05959e-06
		565.8	6.00811e-06
		565.9	5.95702e-06
		566	5.90632e-06
		566.1	5.85602e-06
		566.2	5.80611e-06
		566.3	5.75658e-06
		566.4	5.70744e-06
		566.5	5.65868e-06
		566.6	5.61029e-06
		566.7	5.56228e-06
		566.8	5.51464e-06
		566.9	5.46737e-06
		567	5.4046e-06
		567.1	5.35843e-06
		567.2	5.31261e-06
		567.3	5.26715e-06
		567.4	5.22203e-06
		567.5	5.17726e-06
		567.6	5.13284e-06
		567.7	5.08875e-06
		567.8	5.04501e-06
		567.9	5.0016e-06
		568	4.95853e-06
		568.1	4.91579e-06
		568.2	4.87338e-06
		568.3	4.8313e-06
		568.4	4.78955e-06
		568.5	4.74811e-06
		568.6	4.707e-06
		568.7	4.66621e-06
		568.8	4.62574e-06
		568.9	4.58558e-06
		569	4.54573e-06
		569.1	4.50619e-06
		569.2	4.46696e-06
		569.3	4.42804e-06
		569.4	4.38942e-06
		569.5	4.35111e-06
		569.6	4.29728e-06
		569.7	4.2599e-06
		569.8	4.22281e-06
		569.9	4.18601e-06
		570	4.14949e-06
		570.1	4.11326e-06
		570.2	4.07731e-06
		570.3	4.04163e-06
		570.4	4.00624e-06
		570.5	3.97112e-06
		570.6	3.93627e-06
		570.7	3.90169e-06
		570.8	3.86739e-06
		570.9	3.83335e-06
		571	3.79958e-06
		571.1	3.76607e-06
		571.2	3.73283e-06
		571.3	3.69984e-06
		571.4	3.66712e-06
		571.5	3.63466e-06
		571.6	3.60245e-06
		571.7	3.57049e-06
		571.8	3.53879e-06
		571.9	3.50733e-06
		572	3.47613e-06
		572.1	3.44517e-06
		572.2	3.41446e-06
		572.3	3.38399e-06
		572.4	3.35377e-06
		572.5	3.32378e-06
		572.6	3.29404e-06
		572.7	3.26453e-06
		572.8	3.23526e-06
		572.9	3.20622e-06
		573	3.17741e-06
		573.1	3.14884e-06
		573.2	3.12049e-06
		573.3	3.09237e-06
		573.4	3.06448e-06
		573.5	3.03681e-06
		573.6	3.00937e-06
		573.7	2.98215e-06
		573.8	2.95514e-06
		573.9	2.92836e-06
		574	2.90179e-06
		574.1	2.87544e-06
		574.2	2.8493e-06
		574.3	2.82337e-06
		574.4	2.79765e-06
		574.5	2.77215e-06
		574.6	2.74685e-06
		574.7	2.70592e-06
		574.8	2.68136e-06
		574.9	2.65699e-06
		575	2.63281e-06
		575.1	2.60883e-06
		575.2	2.58505e-06
		575.3	2.56145e-06
		575.4	2.53805e-06
		575.5	2.51484e-06
		575.6	2.49181e-06
		575.7	2.46897e-06
		575.8	2.44632e-06
		575.9	2.42385e-06
		576	2.40157e-06
		576.1	2.37946e-06
		576.2	2.35754e-06
		576.3	2.3358e-06
		576.4	2.31423e-06
		576.5	2.29285e-06
		576.6	2.27163e-06
		576.7	2.2506e-06
		576.8	2.22973e-06
		576.9	2.20904e-06
		577	2.18852e-06
		577.1	2.16817e-06
		577.2	2.14798e-06
		577.3	2.12797e-06
		577.4	2.10812e-06
		577.5	2.08843e-06
		577.6	2.06891e-06
		577.7	2.04955e-06
		577.8	2.03036e-06
		577.9	2.01132e-06
		578	1.99244e-06
		578.1	1.97373e-06
		578.2	1.95516e-06
		578.3	1.93676e-06
		578.4	1.91851e-06
		578.5	1.90041e-06
		578.6	1.88246e-06
		578.7	1.86467e-06
		578.8	1.84703e-06
		578.9	1.82953e-06
		579	1.81219e-06
		579.1	1.79499e-06
		579.2	1.77794e-06
		579.3	1.76103e-06
		579.4	1.74426e-06
		579.5	1.72764e-06
		579.6	1.71116e-06
		579.7	1.69483e-06
		579.8	1.67863e-06
		579.9	1.66257e-06
[truncated: 1 more rows]

## Sheet: PlotDat14
Source sheet	entregar - entregar	400	6.21176e-06	460	0	400	0
Plot name	ProbDens0	400.075	6.28521e-06	464	0	549.925	0
Plot Type	16	400.15	6.35947e-06	464	1
1st free col	9	400.225	6.4579e-06	460	1
Sigma Level	2	400.3	6.53429e-06	460	0
Absolute Errs	FALSE	400.375	6.61152e-06	ErrBox	ErrBox
Symbol Type	1	400.45	6.6896e-06	464	0
Inverse Plot	FALSE	400.525	6.76854e-06	468	0
Color Plot	TRUE	400.6	6.84834e-06	468	2
3D plot	FALSE	400.675	6.92901e-06	464	2
Linear	FALSE	400.75	7.01056e-06	464	0
Data Range	CR72:CS114	400.825	7.093e-06	ErrBox	ErrBox
Filled Symbols	FALSE	400.9	7.17635e-06	468	0
ConcAge	FALSE	400.975	7.2606e-06	472	0
ConcSwap	FALSE	401.05	7.34576e-06	472	5
1st Symbol-row	1	401.125	7.43186e-06	468	5
		401.2	7.51889e-06	468	0
		401.275	7.60686e-06	ErrBox	ErrBox
		401.35	7.69579e-06	472	0
		401.425	7.78568e-06	476	0
		401.5	7.87655e-06	476	3
		401.575	7.9684e-06	472	3
		401.65	8.06124e-06	472	0
		401.725	8.15508e-06	ErrBox	ErrBox
		401.8	8.24993e-06	476	0
		401.875	8.34581e-06	480	0
		401.95	8.44271e-06	480	10
		402.025	8.54066e-06	476	10
		402.1	8.63966e-06	476	0
		402.175	8.73973e-06	ErrBox	ErrBox
		402.25	8.84086e-06	480	0
		402.325	8.94308e-06	484	0
		402.4	9.04639e-06	484	3
		402.475	9.15081e-06	480	3
		402.55	9.25634e-06	480	0
		402.625	9.363e-06	ErrBox	ErrBox
		402.7	9.47079e-06	484	0
		402.775	9.57973e-06	488	0
		402.85	9.68983e-06	488	7
		402.925	9.8011e-06	484	7
		403	9.91355e-06	484	0
		403.075	1.00272e-05	ErrBox	ErrBox
		403.15	1.0142e-05	488	0
		403.225	1.02581e-05	492	0
		403.3	1.03754e-05	492	4
		403.375	1.04939e-05	488	4
		403.45	1.06137e-05	488	0
		403.525	1.07347e-05	ErrBox	ErrBox
		403.6	1.0857e-05	492	0
		403.675	1.09806e-05	496	0
		403.75	1.11055e-05	496	4
		403.825	1.12318e-05	492	4
		403.9	1.13593e-05	492	0
		403.975	1.14882e-05	ErrBox	ErrBox
		404.05	1.16184e-05	496	0
		404.125	1.175e-05	500	0
		404.2	1.18829e-05	500	3
		404.275	1.20173e-05	496	3
		404.35	1.2153e-05	496	0
		404.425	1.22902e-05	ErrBox	ErrBox
		404.5	1.24287e-05	500	0
		404.575	1.25688e-05	504	0
		404.65	1.27102e-05	504	1
		404.725	1.28532e-05	500	1
		404.8	1.29976e-05	500	0
		404.875	1.31435e-05	ErrBox	ErrBox
		404.95	1.3291e-05
		405.025	1.34399e-05
		405.1	1.35904e-05
		405.175	1.37425e-05
		405.25	1.38961e-05
		405.325	1.40513e-05
		405.4	1.4208e-05
		405.475	1.43664e-05
		405.55	1.45264e-05
		405.625	1.46881e-05
		405.7	1.48514e-05
		405.775	1.50164e-05
		405.85	1.5183e-05
		405.925	1.53514e-05
		406	1.55215e-05
		406.075	1.56933e-05
		406.15	1.58669e-05
		406.225	1.60422e-05
		406.3	1.62193e-05
		406.375	1.63982e-05
		406.45	1.65789e-05
		406.525	1.67614e-05
		406.6	1.69458e-05
		406.675	1.71321e-05
		406.75	1.73202e-05
		406.825	1.75339e-05
		406.9	1.77264e-05
		406.975	1.79208e-05
		407.05	1.81172e-05
		407.125	1.83156e-05
		407.2	1.85159e-05
		407.275	1.87183e-05
		407.35	1.89226e-05
		407.425	1.91291e-05
		407.5	1.93376e-05
		407.575	1.95482e-05
		407.65	1.97609e-05
		407.725	1.99757e-05
		407.8	2.01927e-05
		407.875	2.04118e-05
		407.95	2.06331e-05
		408.025	2.08566e-05
		408.1	2.10823e-05
		408.175	2.13103e-05
		408.25	2.15405e-05
		408.325	2.1773e-05
		408.4	2.20078e-05
		408.475	2.22449e-05
		408.55	2.24844e-05
		408.625	2.27262e-05
		408.7	2.29704e-05
		408.775	2.3217e-05
		408.85	2.3466e-05
		408.925	2.37175e-05
		409	2.39715e-05
		409.075	2.42279e-05
		409.15	2.44868e-05
		409.225	2.47483e-05
		409.3	2.50357e-05
		409.375	2.53028e-05
		409.45	2.55725e-05
		409.525	2.58448e-05
		409.6	2.61197e-05
		409.675	2.63974e-05
		409.75	2.66777e-05
		409.825	2.69608e-05
		409.9	2.72466e-05
		409.975	2.75352e-05
		410.05	2.78265e-05
		410.125	2.81207e-05
		410.2	2.84177e-05
		410.275	2.87176e-05
		410.35	2.90204e-05
		410.425	2.93261e-05
		410.5	2.96347e-05
		410.575	2.99464e-05
		410.65	3.02609e-05
		410.725	3.05786e-05
		410.8	3.08992e-05
		410.875	3.12229e-05
		410.95	3.15497e-05
		411.025	3.18797e-05
		411.1	3.22361e-05
		411.175	3.25728e-05
		411.25	3.29128e-05
		411.325	3.3256e-05
		411.4	3.36025e-05
		411.475	3.39522e-05
		411.55	3.43053e-05
		411.625	3.46617e-05
		411.7	3.50215e-05
		411.775	3.53847e-05
		411.85	3.57514e-05
		411.925	3.61215e-05
		412	3.64951e-05
		412.075	3.68722e-05
		412.15	3.72528e-05
		412.225	3.76371e-05
		412.3	3.80249e-05
		412.375	3.84164e-05
		412.45	3.88115e-05
		412.525	3.92104e-05
		412.6	3.9613e-05
		412.675	4.00193e-05
		412.75	4.04294e-05
		412.825	4.08671e-05
		412.9	4.12855e-05
		412.975	4.17078e-05
		413.05	4.2134e-05
		413.125	4.25641e-05
		413.2	4.29983e-05
		413.275	4.34365e-05
		413.35	4.38787e-05
		413.425	4.43251e-05
		413.5	4.47755e-05
		413.575	4.52302e-05
		413.65	4.5689e-05
		413.725	4.6152e-05
		413.8	4.66193e-05
		413.875	4.70909e-05
		413.95	4.75903e-05
		414.025	4.80713e-05
		414.1	4.85567e-05
		414.175	4.90465e-05
		414.25	4.95409e-05
		414.325	5.00397e-05
		414.4	5.05432e-05
		414.475	5.10512e-05
		414.55	5.15639e-05
		414.625	5.20812e-05
		414.7	5.26033e-05
		414.775	5.31301e-05
		414.85	5.36617e-05
		414.925	5.41981e-05
		415	5.47394e-05
		415.075	5.52857e-05
		415.15	5.58368e-05
		415.225	5.6393e-05
		415.3	5.69541e-05
		415.375	5.75204e-05
		415.45	5.80917e-05
		415.525	5.86682e-05
		415.6	5.92499e-05
		415.675	5.98368e-05
		415.75	6.04289e-05
		415.825	6.10264e-05
		415.9	6.16292e-05
		415.975	6.22375e-05
		416.05	6.28511e-05
		416.125	6.34703e-05
		416.2	6.40949e-05
		416.275	6.47485e-05
		416.35	6.53848e-05
		416.425	6.60269e-05
		416.5	6.66746e-05
		416.575	6.73281e-05
		416.65	6.79874e-05
		416.725	6.86758e-05
		416.8	6.93475e-05
		416.875	7.00251e-05
		416.95	7.07087e-05
		417.025	7.14217e-05
		417.1	7.21179e-05
		417.175	7.28203e-05
		417.25	7.35289e-05
		417.325	7.42438e-05
		417.4	7.49649e-05
		417.475	7.56924e-05
		417.55	7.64263e-05
		417.625	7.71666e-05
		417.7	7.79134e-05
		417.775	7.86903e-05
		417.85	7.9451e-05
		417.925	8.02183e-05
		418	8.09924e-05
		418.075	8.17732e-05
		418.15	8.25609e-05
		418.225	8.33554e-05
		418.3	8.41568e-05
		418.375	8.49653e-05
		418.45	8.57807e-05
		418.525	8.66269e-05
		418.6	8.74571e-05
		418.675	8.82945e-05
		418.75	8.91392e-05
		418.825	8.99912e-05
		418.9	9.08505e-05
		418.975	9.17173e-05
		419.05	9.25916e-05
		419.125	9.34969e-05
		419.2	9.4387e-05
		419.275	9.52848e-05
		419.35	9.61903e-05
		419.425	9.71271e-05
		419.5	9.80489e-05
		419.575	9.89786e-05
		419.65	9.99164e-05
		419.725	0.000100862
		419.8	0.000101816
		419.875	0.000102778
		419.95	0.000103749
		420.025	0.000104727
		420.1	0.000105714
		420.175	0.00010671
		420.25	0.000107714
		420.325	0.000108726
		420.4	0.000109748
		420.475	0.000110777
		420.55	0.00011184
		420.625	0.000112888
		420.7	0.000113945
		420.775	0.000115011
		420.85	0.000116086
		420.925	0.00011717
		421	0.000118264
		421.075	0.000119366
		421.15	0.000120478
		421.225	0.0001216
		421.3	0.00012273
		421.375	0.000123871
		421.45	0.000125021
		421.525	0.00012618
		421.6	0.00012735
		421.675	0.000128529
		421.75	0.000129718
		421.825	0.000130918
		421.9	0.000132127
		421.975	0.00013337
		422.05	0.0001346
		422.125	0.000135841
		422.2	0.000137092
		422.275	0.000138353
		422.35	0.000139625
		422.425	0.000140932
		422.5	0.000142226
		422.575	0.000143531
		422.65	0.000144847
		422.725	0.000146173
		422.8	0.000147511
		422.875	0.00014886
		422.95	0.000150221
		423.025	0.000151592
		423.1	0.000152999
		423.175	0.000154394
		423.25	0.000155824
		423.325	0.000157243
		423.4	0.000158674
		423.475	0.000160117
		423.55	0.000161571
		423.625	0.000163038
		423.7	0.000164517
		423.775	0.000166008
		423.85	0.000167512
		423.925	0.000169028
		424	0.000170556
		424.075	0.000172097
		424.15	0.000173651
		424.225	0.000175217
		424.3	0.000176797
		424.375	0.00017839
		424.45	0.000179995
		424.525	0.000181614
		424.6	0.000183246
		424.675	0.000184892
		424.75	0.000186551
		424.825	0.000188224
		424.9	0.000189911
		424.975	0.000191611
		425.05	0.000193325
		425.125	0.000195054
		425.2	0.000196796
		425.275	0.000198553
		425.35	0.000200325
		425.425	0.00020211
		425.5	0.000203911
		425.575	0.000205726
		425.65	0.000207555
		425.725	0.0002094
		425.8	0.00021126
		425.875	0.000213159
		425.95	0.00021505
		426.025	0.000216956
		426.1	0.000218878
		426.175	0.000220816
		426.25	0.00022277
		426.325	0.000224739
		426.4	0.000226724
		426.475	0.000228726
		426.55	0.000230744
		426.625	0.000232778
		426.7	0.000234829
		426.775	0.000236897
		426.85	0.000238981
		426.925	0.000241082
		427	0.000243201
		427.075	0.000245336
		427.15	0.000247489
		427.225	0.00024966
		427.3	0.000251848
		427.375	0.000254077
		427.45	0.000256301
		427.525	0.000258543
		427.6	0.000260827
		427.675	0.000263107
		427.75	0.000265405
		427.825	0.000267721
		427.9	0.000270056
		427.975	0.000272411
		428.05	0.000274784
		428.125	0.000277176
		428.2	0.000279588
		428.275	0.00028202
		428.35	0.000284471
		428.425	0.000286942
		428.5	0.000289433
		428.575	0.000291944
		428.65	0.000294475
		428.725	0.000297027
		428.8	0.000299599
		428.875	0.000302193
		428.95	0.000304807
		429.025	0.000307442
		429.1	0.000310099
		429.175	0.000312801
		429.25	0.000315501
		429.325	0.000318224
		429.4	0.000320969
		429.475	0.000323759
		429.55	0.000326549
		429.625	0.000329362
		429.7	0.000332197
		429.775	0.000335055
		429.85	0.000337937
		429.925	0.000340842
		430	0.00034377
		430.075	0.000346722
		430.15	0.000349698
		430.225	0.000352722
		430.3	0.000355747
		430.375	0.000358796
		430.45	0.000361871
		430.525	0.00036497
		430.6	0.000368094
		430.675	0.000371244
		430.75	0.000374419
		430.825	0.00037762
		430.9	0.000380847
		430.975	0.0003841
		431.05	0.00038738
		431.125	0.000390686
		431.2	0.000394019
		431.275	0.000397379
		431.35	0.000400766
		431.425	0.000404181
		431.5	0.000407624
		431.575	0.000411118
		431.65	0.000414617
		431.725	0.000418169
		431.8	0.000421726
		431.875	0.000425312
		431.95	0.000428928
		432.025	0.000432573
		432.1	0.000436247
		432.175	0.000439952
		432.25	0.000443686
		432.325	0.000447452
		432.4	0.000451247
		432.475	0.000455074
		432.55	0.000458932
		432.625	0.000462822
		432.7	0.000466743
		432.775	0.000470697
		432.85	0.000474683
		432.925	0.000478701
		433	0.000482752
		433.075	0.000486836
		433.15	0.000490954
		433.225	0.000495106
		433.3	0.000499291
		433.375	0.000503511
		433.45	0.000507765
		433.525	0.000512055
		433.6	0.000516379
		433.675	0.000520739
		433.75	0.000525135
		433.825	0.000529567
		433.9	0.000534035
		433.975	0.00053854
		434.05	0.000543082
		434.125	0.000547662
		434.2	0.000552279
		434.275	0.000556934
		434.35	0.000561627
		434.425	0.00056636
		434.5	0.000571131
		434.575	0.000575942
		434.65	0.000580792
		434.725	0.000585682
		434.8	0.000590613
		434.875	0.000595585
		434.95	0.000600598
		435.025	0.000605652
		435.1	0.000610748
		435.175	0.000615886
		435.25	0.000621067
		435.325	0.000626291
		435.4	0.000631558
		435.475	0.000636869
		435.55	0.000642224
		435.625	0.000647623
		435.7	0.000653068
		435.775	0.000658557
		435.85	0.000664093
		435.925	0.000669674
		436	0.000675302
		436.075	0.000680977
		436.15	0.000686699
		436.225	0.000692469
		436.3	0.000698287
		436.375	0.000704153
		436.45	0.000710069
		436.525	0.000716058
		436.6	0.000722073
		436.675	0.000728139
		436.75	0.000734256
		436.825	0.000740424
		436.9	0.000746644
		436.975	0.000752916
		437.05	0.000759241
		437.125	0.000765619
		437.2	0.00077205
		437.275	0.000778536
		437.35	0.000785076
		437.425	0.000791671
		437.5	0.000798322
		437.575	0.000805028
		437.65	0.000811815
		437.725	0.000818636
		437.8	0.000825538
		437.875	0.000832475
		437.95	0.000839471
		438.025	0.000846526
		438.1	0.000853641
		438.175	0.000860816
		438.25	0.000868052
		438.325	0.000875349
		438.4	0.000882709
		438.475	0.00089013
		438.55	0.000897614
		438.625	0.000905186
		438.7	0.000912799
		438.775	0.000920477
		438.85	0.00092822
		438.925	0.000936029
		439	0.000943904
		439.075	0.000951847
		439.15	0.000959857
		439.225	0.000967935
		439.3	0.000976083
		439.375	0.0009843
		439.45	0.000992587
		439.525	0.00100094
		439.6	0.00100937
		439.675	0.00101788
		439.75	0.00102645
		439.825	0.0010351
		439.9	0.00104382
		439.975	0.00105261
		440.05	0.00106149
		440.125	0.00107043
		440.2	0.00107946
		440.275	0.00108856
		440.35	0.00109774
		440.425	0.001107
		440.5	0.00111633
		440.575	0.00112575
		440.65	0.00113525
		440.725	0.00114483
		440.8	0.00115449
		440.875	0.00116426
		440.95	0.00117409
		441.025	0.00118401
		441.1	0.00119401
		441.175	0.00120412
		441.25	0.00121429
		441.325	0.00122455
		441.4	0.0012349
		441.475	0.00124534
		441.55	0.00125587
		441.625	0.00126649
		441.7	0.0012772
		441.775	0.001288
		441.85	0.0012989
		441.925	0.00130989
		442	0.00132099
		442.075	0.00133218
		442.15	0.00134345
		442.225	0.00135483
		442.3	0.0013663
		442.375	0.00137788
		442.45	0.00138955
		442.525	0.00140132
		442.6	0.0014132
		442.675	0.00142517
		442.75	0.00143728
		442.825	0.00144946
		442.9	0.00146175
		442.975	0.00147415
		443.05	0.00148666
		443.125	0.00149927
		443.2	0.00151199
		443.275	0.00152482
		443.35	0.00153776
		443.425	0.00155081
		443.5	0.00156398
		443.575	0.00157726
		443.65	0.00159065
		443.725	0.00160416
		443.8	0.00161779
		443.875	0.00163153
		443.95	0.00164539
		444.025	0.00165938
		444.1	0.00167348
		444.175	0.0016877
		444.25	0.00170205
		444.325	0.00171652
		444.4	0.00173111
		444.475	0.00174583
		444.55	0.00176068
		444.625	0.00177565
		444.7	0.00179075
		444.775	0.00180598
		444.85	0.00182135
		444.925	0.00183684
		445	0.00185247
		445.075	0.00186823
		445.15	0.00188413
		445.225	0.00190016
		445.3	0.00191633
		445.375	0.00193264
		445.45	0.00194909
		445.525	0.00196568
		445.6	0.00198241
		445.675	0.00199928
		445.75	0.0020163
		445.825	0.00203346
		445.9	0.00205077
		445.975	0.00206822
		446.05	0.00208583
		446.125	0.00210358
		446.2	0.00212149
		446.275	0.00213954
		446.35	0.00215775
		446.425	0.00217612
		446.5	0.00219464
		446.575	0.00221331
		446.65	0.00223215
		446.725	0.00225114
		446.8	0.0022703
		446.875	0.00228961
		446.95	0.00230911
		447.025	0.00232878
		447.1	0.00234859
		447.175	0.00236856
		447.25	0.0023887
		447.325	0.00240901
		447.4	0.0024295
		447.475	0.00245015
		447.55	0.00247097
		447.625	0.00249197
		447.7	0.00251314
		447.775	0.00253449
		447.85	0.00255602
		447.925	0.00257772
		448	0.00259961
		448.075	0.00262168
		448.15	0.00264393
		448.225	0.00266636
		448.3	0.00268898
		448.375	0.00271178
		448.45	0.00273477
		448.525	0.00275795
		448.6	0.00278132
		448.675	0.00280488
		448.75	0.00282864
		448.825	0.00285259
		448.9	0.00287673
		448.975	0.00290107
		449.05	0.00292563
		449.125	0.00295037
		449.2	0.0029753
		449.275	0.00300044
		449.35	0.00302578
		449.425	0.00305133
		449.5	0.00307708
		449.575	0.00310304
		449.65	0.0031292
		449.725	0.00315558
		449.8	0.00318216
		449.875	0.00320896
		449.95	0.00323597
		450.025	0.0032632
		450.1	0.00329063
		450.175	0.00331829
		450.25	0.00334617
		450.325	0.00337426
		450.4	0.00340257
		450.475	0.00343111
		450.55	0.00345987
		450.625	0.00348885
		450.7	0.00351806
		450.775	0.0035475
		450.85	0.00357716
		450.925	0.00360706
		451	0.00363718
		451.075	0.00366754
		451.15	0.00369813
		451.225	0.00372895
		451.3	0.00376001
		451.375	0.0037913
		451.45	0.00382283
		451.525	0.00385461
		451.6	0.00388664
		451.675	0.0039189
		451.75	0.00395139
		451.825	0.00398413
		451.9	0.00401712
		451.975	0.00405035
		452.05	0.00408383
		452.125	0.00411755
		452.2	0.00415153
		452.275	0.00418576
		452.35	0.00422023
		452.425	0.00425496
		452.5	0.00428995
		452.575	0.00432519
		452.65	0.00436068
		452.725	0.00439644
		452.8	0.00443245
		452.875	0.00446872
		452.95	0.00450525
		453.025	0.00454204
		453.1	0.00457909
		453.175	0.00461641
		453.25	0.00465399
		453.325	0.00469183
		453.4	0.00472995
		453.475	0.00476832
		453.55	0.00480697
		453.625	0.00484589
		453.7	0.00488507
		453.775	0.00492453
		453.85	0.00496425
		453.925	0.00500425
		454	0.00504452
		454.075	0.00508507
		454.15	0.00512589
		454.225	0.00516699
		454.3	0.00520836
		454.375	0.00525001
		454.45	0.00529196
		454.525	0.00533417
		454.6	0.00537666
		454.675	0.00541942
		454.75	0.00546247
		454.825	0.0055058
		454.9	0.00554941
		454.975	0.0055933
		455.05	0.00563748
		455.125	0.00568194
		455.2	0.00572668
		455.275	0.00577171
		455.35	0.00581703
		455.425	0.00586263
		455.5	0.00590851
		455.575	0.00595468
		455.65	0.00600114
		455.725	0.00604789
		455.8	0.00609492
		455.875	0.00614225
		455.95	0.00618986
		456.025	0.00623776
		456.1	0.00628595
		456.175	0.00633442
		456.25	0.00638319
		456.325	0.00643225
		456.4	0.0064816
		456.475	0.00653123
		456.55	0.00658116
		456.625	0.00663138
		456.7	0.00668189
		456.775	0.00673269
		456.85	0.00678377
		456.925	0.00683515
		457	0.00688682
		457.075	0.00693878
		457.15	0.00699103
		457.225	0.00704357
		457.3	0.0070964
		457.375	0.00714952
		457.45	0.00720293
		457.525	0.00725663
		457.6	0.00731061
		457.675	0.00736489
		457.75	0.00741945
		457.825	0.0074743
		457.9	0.00752944
		457.975	0.00758487
		458.05	0.00764058
		458.125	0.00769658
		458.2	0.00775286
		458.275	0.00780943
		458.35	0.00786628
		458.425	0.00792342
		458.5	0.00798084
		458.575	0.00803854
		458.65	0.00809652
		458.725	0.00815478
		458.8	0.00821333
		458.875	0.00827215
		458.95	0.00833125
		459.025	0.00839063
		459.1	0.00845029
		459.175	0.00851022
		459.25	0.00857042
		459.325	0.0086309
		459.4	0.00869165
		459.475	0.00875267
		459.55	0.00881396
		459.625	0.00887552
		459.7	0.00893734
		459.775	0.00899944
		459.85	0.0090618
		459.925	0.00912442
		460	0.0091873
		460.075	0.00925044
		460.15	0.00931385
		460.225	0.00937751
		460.3	0.00944142
		460.375	0.00950559
		460.45	0.00957002
		460.525	0.00963469
		460.6	0.00969961
		460.675	0.00976478
		460.75	0.0098302
		460.825	0.00989586
		460.9	0.00996177
		460.975	0.0100279
		461.05	0.0100943
		461.125	0.0101609
		461.2	0.0102278
		461.275	0.0102948
		461.35	0.0103622
		461.425	0.0104297
		461.5	0.0104975
		461.575	0.0105655
		461.65	0.0106337
		461.725	0.0107021
		461.8	0.0107708
		461.875	0.0108396
		461.95	0.0109087
		462.025	0.010978
		462.1	0.0110475
		462.175	0.0111172
		462.25	0.0111871
		462.325	0.0112571
		462.4	0.0113274
		462.475	0.0113979
		462.55	0.0114686
		462.625	0.0115395
		462.7	0.0116105
		462.775	0.0116817
		462.85	0.0117531
		462.925	0.0118247
		463	0.0118965
		463.075	0.0119684
		463.15	0.0120405
		463.225	0.0121128
		463.3	0.0121852
		463.375	0.0122578
		463.45	0.0123305
		463.525	0.0124034
		463.6	0.0124764
		463.675	0.0125496
		463.75	0.0126229
		463.825	0.0126964
		463.9	0.01277
		463.975	0.0128437
		464.05	0.0129175
		464.125	0.0129915
		464.2	0.0130656
		464.275	0.0131398
		464.35	0.0132141
		464.425	0.0132885
		464.5	0.0133631
		464.575	0.0134377
		464.65	0.0135124
		464.725	0.0135873
		464.8	0.0136622
		464.875	0.0137372
		464.95	0.0138123
		465.025	0.0138874
		465.1	0.0139627
		465.175	0.014038
		465.25	0.0141133
		465.325	0.0141888
		465.4	0.0142643
		465.475	0.0143398
		465.55	0.0144154
		465.625	0.014491
		465.7	0.0145667
		465.775	0.0146424
		465.85	0.0147182
		465.925	0.014794
		466	0.0148698
		466.075	0.0149456
		466.15	0.0150214
		466.225	0.0150973
		466.3	0.0151731
		466.375	0.0152489
		466.45	0.0153248
		466.525	0.0154006
		466.6	0.0154765
		466.675	0.0155523
		466.75	0.015628
		466.825	0.0157038
		466.9	0.0157795
		466.975	0.0158552
		467.05	0.0159309
		467.125	0.0160065
		467.2	0.016082
		467.275	0.0161575
		467.35	0.016233
		467.425	0.0163084
		467.5	0.0163837
		467.575	0.0164589
		467.65	0.0165341
		467.725	0.0166091
		467.8	0.0166841
		467.875	0.016759
		467.95	0.0168338
		468.025	0.0169085
		468.1	0.0169831
		468.175	0.0170575
		468.25	0.0171319
		468.325	0.0172061
		468.4	0.0172802
		468.475	0.0173542
		468.55	0.017428
		468.625	0.0175017
		468.7	0.0175752
		468.775	0.0176486
		468.85	0.0177219
		468.925	0.0177949
		469	0.0178678
		469.075	0.0179406
		469.15	0.0180131
		469.225	0.0180855
		469.3	0.0181577
		469.375	0.0182297
		469.45	0.0183015
		469.525	0.0183731
		469.6	0.0184445
		469.675	0.0185156
		469.75	0.0185866
		469.825	0.0186573
		469.9	0.0187279
		469.975	0.0187981
		470.05	0.0188682
		470.125	0.018938
		470.2	0.0190076
		470.275	0.0190769
		470.35	0.0191459
		470.425	0.0192147
		470.5	0.0192833
		470.575	0.0193515
		470.65	0.0194195
		470.725	0.0194872
		470.8	0.0195547
		470.875	0.0196218
		470.95	0.0196886
		471.025	0.0197552
		471.1	0.0198214
		471.175	0.0198874
		471.25	0.019953
		471.325	0.0200183
		471.4	0.0200833
		471.475	0.020148
		471.55	0.0202123
		471.625	0.0202763
		471.7	0.02034
		471.775	0.0204033
		471.85	0.0204663
		471.925	0.0205289
		472	0.0205912
		472.075	0.0206531
		472.15	0.0207146
		472.225	0.0207758
		472.3	0.0208366
		472.375	0.020897
		472.45	0.0209571
		472.525	0.0210167
		472.6	0.021076
		472.675	0.0211349
		472.75	0.0211934
		472.825	0.0212515
		472.9	0.0213092
		472.975	0.0213664
		473.05	0.0214233
		473.125	0.0214797
		473.2	0.0215358
		473.275	0.0215914
		473.35	0.0216465
		473.425	0.0217013
		473.5	0.0217556
		473.575	0.0218095
		473.65	0.0218629
		473.725	0.0219159
		473.8	0.0219685
		473.875	0.0220206
		473.95	0.0220722
		474.025	0.0221234
		474.1	0.0221741
		474.175	0.0222244
		474.25	0.0222742
		474.325	0.0223235
		474.4	0.0223723
		474.475	0.0224207
		474.55	0.0224686
		474.625	0.022516
		474.7	0.022563
		474.775	0.0226094
		474.85	0.0226554
		474.925	0.0227009
		475	0.0227459
		475.075	0.0227903
		475.15	0.0228343
		475.225	0.0228778
		475.3	0.0229208
		475.375	0.0229633
		475.45	0.0230052
		475.525	0.0230467
		475.6	0.0230876
		475.675	0.0231281
		475.75	0.023168
		475.825	0.0232074
		475.9	0.0232463
		475.975	0.0232846
		476.05	0.0233225
		476.125	0.0233598
		476.2	0.0233966
		476.275	0.0234328
		476.35	0.0234685
		476.425	0.0235037
		476.5	0.0235384
		476.575	0.0235725
		476.65	0.0236061
		476.725	0.0236392
		476.8	0.0236717
		476.875	0.0237037
		476.95	0.0237351
		477.025	0.023766
		477.1	0.0237964
		477.175	0.0238262
		477.25	0.0238555
		477.325	0.0238842
		477.4	0.0239124
		477.475	0.02394
		477.55	0.0239671
		477.625	0.0239937
		477.7	0.0240197
		477.775	0.0240451
		477.85	0.02407
		477.925	0.0240943
		478	0.0241181
		478.075	0.0241414
		478.15	0.0241641
		478.225	0.0241862
		478.3	0.0242078
		478.375	0.0242289
		478.45	0.0242494
		478.525	0.0242693
		478.6	0.0242887
		478.675	0.0243076
		478.75	0.0243259
		478.825	0.0243436
		478.9	0.0243608
		478.975	0.0243775
		479.05	0.0243935
		479.125	0.0244091
		479.2	0.0244241
		479.275	0.0244385
		479.35	0.0244525
		479.425	0.0244658
		479.5	0.0244786
		479.575	0.0244909
		479.65	0.0245026
		479.725	0.0245138
		479.8	0.0245244
		479.875	0.0245345
		479.95	0.024544
		480.025	0.0245531
		480.1	0.0245615
		480.175	0.0245694
		480.25	0.0245768
		480.325	0.0245837
		480.4	0.02459
		480.475	0.0245958
		480.55	0.024601
		480.625	0.0246057
		480.7	0.0246099
		480.775	0.0246136
		480.85	0.0246167
		480.925	0.0246193
		481	0.0246214
		481.075	0.0246229
		481.15	0.0246239
		481.225	0.0246244
		481.3	0.0246244
		481.375	0.0246239
		481.45	0.0246228
		481.525	0.0246212
		481.6	0.0246191
		481.675	0.0246165
		481.75	0.0246134
		481.825	0.0246098
		481.9	0.0246057
		481.975	0.024601
		482.05	0.0245959
		482.125	0.0245902
		482.2	0.0245841
		482.275	0.0245774
		482.35	0.0245703
		482.425	0.0245626
		482.5	0.0245545
		482.575	0.0245459
		482.65	0.0245367
		482.725	0.0245271
		482.8	0.024517
		482.875	0.0245064
		482.95	0.0244954
		483.025	0.0244838
		483.1	0.0244718
		483.175	0.0244593
		483.25	0.0244463
		483.325	0.0244329
		483.4	0.0244189
		483.475	0.0244045
		483.55	0.0243897
		483.625	0.0243743
		483.7	0.0243585
		483.775	0.0243423
		483.85	0.0243256
		483.925	0.0243084
		484	0.0242908
		484.075	0.0242727
		484.15	0.0242541
		484.225	0.0242352
		484.3	0.0242157
		484.375	0.0241958
		484.45	0.0241755
		484.525	0.0241548
		484.6	0.0241336
		484.675	0.0241119
		484.75	0.0240898
		484.825	0.0240673
		484.9	0.0240444
		484.975	0.024021
		485.05	0.0239972
		485.125	0.023973
		485.2	0.0239484
		485.275	0.0239233
		485.35	0.0238978
		485.425	0.0238719
		485.5	0.0238456
		485.575	0.0238189
		485.65	0.0237918
		485.725	0.0237642
		485.8	0.0237363
		485.875	0.0237079
		485.95	0.0236792
		486.025	0.02365
		486.1	0.0236205
		486.175	0.0235906
		486.25	0.0235602
		486.325	0.0235295
		486.4	0.0234984
		486.475	0.0234669
		486.55	0.023435
		486.625	0.0234027
		486.7	0.0233701
		486.775	0.023337
		486.85	0.0233036
		486.925	0.0232698
		487	0.0232357
		487.075	0.0232011
		487.15	0.0231662
		487.225	0.023131
		487.3	0.0230954
		487.375	0.0230594
		487.45	0.023023
		487.525	0.0229863
		487.6	0.0229493
		487.675	0.0229118
		487.75	0.0228741
		487.825	0.0228359
		487.9	0.0227975
		487.975	0.0227587
		488.05	0.0227195
		488.125	0.02268
		488.2	0.0226401
		488.275	0.0226
		488.35	0.0225594
		488.425	0.0225186
		488.5	0.0224774
		488.575	0.0224359
		488.65	0.0223941
		488.725	0.0223519
		488.8	0.0223094
		488.875	0.0222666
		488.95	0.0222234
		489.025	0.02218
		489.1	0.0221362
		489.175	0.0220921
		489.25	0.0220477
		489.325	0.022003
		489.4	0.021958
		489.475	0.0219126
		489.55	0.021867
		489.625	0.0218211
		489.7	0.0217748
		489.775	0.0217283
		489.85	0.0216815
		489.925	0.0216343
		490	0.0215869
		490.075	0.0215392
		490.15	0.0214912
		490.225	0.0214429
		490.3	0.0213943
		490.375	0.0213455
		490.45	0.0212964
		490.525	0.0212469
		490.6	0.0211972
		490.675	0.0211473
		490.75	0.021097
		490.825	0.0210465
		490.9	0.0209957
		490.975	0.0209447
		491.05	0.0208933
		491.125	0.0208418
		491.2	0.0207899
		491.275	0.0207378
		491.35	0.0206854
		491.425	0.0206328
		491.5	0.02058
		491.575	0.0205268
		491.65	0.0204735
		491.725	0.0204198
		491.8	0.020366
		491.875	0.0203119
		491.95	0.0202575
		492.025	0.0202029
		492.1	0.0201481
		492.175	0.020093
		492.25	0.0200377
		492.325	0.0199822
		492.4	0.0199264
		492.475	0.0198704
		492.55	0.0198142
		492.625	0.0197578
		492.7	0.0197011
		492.775	0.0196443
		492.85	0.0195872
		492.925	0.0195299
		493	0.0194724
		493.075	0.0194146
		493.15	0.0193567
		493.225	0.0192986
		493.3	0.0192402
		493.375	0.0191817
		493.45	0.0191229
		493.525	0.019064
		493.6	0.0190049
		493.675	0.0189455
		493.75	0.018886
		493.825	0.0188263
		493.9	0.0187664
		493.975	0.0187063
		494.05	0.0186461
		494.125	0.0185856
		494.2	0.018525
		494.275	0.0184642
		494.35	0.0184033
		494.425	0.0183421
		494.5	0.0182808
		494.575	0.0182193
		494.65	0.0181577
		494.725	0.0180959
		494.8	0.018034
		494.875	0.0179719
		494.95	0.0179096
		495.025	0.0178472
		495.1	0.0177846
		495.175	0.0177219
		495.25	0.0176591
		495.325	0.0175961
		495.4	0.0175329
		495.475	0.0174697
		495.55	0.0174063
		495.625	0.0173427
		495.7	0.0172791
		495.775	0.0172153
		495.85	0.0171514
		495.925	0.0170873
		496	0.0170232
		496.075	0.0169589
		496.15	0.0168945
		496.225	0.01683
		496.3	0.0167654
		496.375	0.0167006
		496.45	0.0166358
		496.525	0.0165709
		496.6	0.0165058
		496.675	0.0164407
		496.75	0.0163755
		496.825	0.0163102
		496.9	0.0162448
		496.975	0.0161793
		497.05	0.0161137
		497.125	0.0160481
		497.2	0.0159823
		497.275	0.0159165
		497.35	0.0158506
		497.425	0.0157847
		497.5	0.0157186
		497.575	0.0156525
		497.65	0.0155864
		497.725	0.0155202
		497.8	0.0154539
		497.875	0.0153876
		497.95	0.0153212
		498.025	0.0152547
		498.1	0.0151882
		498.175	0.0151217
		498.25	0.0150551
		498.325	0.0149885
		498.4	0.0149219
		498.475	0.0148552
		498.55	0.0147885
		498.625	0.0147217
		498.7	0.014655
		498.775	0.0145882
		498.85	0.0145214
		498.925	0.0144545
		499	0.0143877
		499.075	0.0143208
		499.15	0.0142539
		499.225	0.014187
		499.3	0.0141202
		499.375	0.0140533
		499.45	0.0139864
		499.525	0.0139195
		499.6	0.0138526
		499.675	0.0137857
		499.75	0.0137189
		499.825	0.013652
		499.9	0.0135852
		499.975	0.0135183
		500.05	0.0134515
		500.125	0.0133848
		500.2	0.013318
		500.275	0.0132513
		500.35	0.0131846
		500.425	0.0131179
		500.5	0.0130513
		500.575	0.0129847
		500.65	0.0129182
		500.725	0.0128517
		500.8	0.0127853
		500.875	0.0127189
		500.95	0.0126525
		501.025	0.0125862
		501.1	0.01252
		501.175	0.0124538
		501.25	0.0123877
		501.325	0.0123216
		501.4	0.0122557
		501.475	0.0121897
		501.55	0.0121239
		501.625	0.0120581
		501.7	0.0119924
		501.775	0.0119268
		501.85	0.0118613
		501.925	0.0117958
		502	0.0117305
		502.075	0.0116652
		502.15	0.0116
		502.225	0.0115349
		502.3	0.0114699
		502.375	0.011405
		502.45	0.0113402
		502.525	0.0112755
		502.6	0.0112109
		502.675	0.0111465
		502.75	0.0110821
		502.825	0.0110178
		502.9	0.0109537
		502.975	0.0108897
		503.05	0.0108257
		503.125	0.010762
		503.2	0.0106983
		503.275	0.0106347
		503.35	0.0105713
		503.425	0.010508
		503.5	0.0104449
		503.575	0.0103819
		503.65	0.010319
		503.725	0.0102562
		503.8	0.0101936
		503.875	0.0101311
		503.95	0.0100688
		504.025	0.0100066
		504.1	0.0099446
		504.175	0.00988271
		504.25	0.00982098
		504.325	0.0097594
		504.4	0.00969798
		504.475	0.00963671
		504.55	0.0095756
		504.625	0.00951466
		504.7	0.00945387
		504.775	0.00939325
		504.85	0.0093328
		504.925	0.00927251
		505	0.0092124
		505.075	0.00915245
		505.15	0.00909268
		505.225	0.00903308
		505.3	0.00897366
		505.375	0.00891442
		505.45	0.00885536
		505.525	0.00879647
		505.6	0.00873777
		505.675	0.00867926
		505.75	0.00862093
		505.825	0.00856279
		505.9	0.00850484
		505.975	0.00844707
		506.05	0.0083895
		506.125	0.00833213
		506.2	0.00827495
		506.275	0.00821796
		506.35	0.00816117
		506.425	0.00810458
		506.5	0.00804819
		506.575	0.007992
		506.65	0.00793602
		506.725	0.00788023
		506.8	0.00782466
		506.875	0.00776929
		506.95	0.00771412
		507.025	0.00765917
		507.1	0.00760442
		507.175	0.00754989
		507.25	0.00749557
		507.325	0.00744146
		507.4	0.00738757
		507.475	0.00733389
		507.55	0.00728043
		507.625	0.00722718
		507.7	0.00717416
		507.775	0.00712135
		507.85	0.00706876
		507.925	0.0070164
		508	0.00696425
		508.075	0.00691233
		508.15	0.00686063
		508.225	0.00680916
		508.3	0.00675791
		508.375	0.00670689
		508.45	0.00665609
		508.525	0.00660553
		508.6	0.00655519
		508.675	0.00650508
		508.75	0.0064552
		508.825	0.00640555
		508.9	0.00635613
		508.975	0.00630694
		509.05	0.00625798
		509.125	0.00620926
		509.2	0.00616077
		509.275	0.00611251
		509.35	0.00606449
		509.425	0.00601671
		509.5	0.00596915
		509.575	0.00592184
		509.65	0.00587473
		509.725	0.00582789
		509.8	0.00578128
		509.875	0.00573491
		509.95	0.00568878
		510.025	0.00564289
		510.1	0.00559723
		510.175	0.00555182
		510.25	0.00550664
		510.325	0.0054617
		510.4	0.005417
		510.475	0.00537254
		510.55	0.00532832
		510.625	0.00528433
		510.7	0.00524059
		510.775	0.00519709
		510.85	0.00515383
		510.925	0.0051108
		511	0.00506802
		511.075	0.00502548
		511.15	0.00498318
		511.225	0.00494112
		511.3	0.0048993
		511.375	0.00485772
		511.45	0.00481638
		511.525	0.00477528
		511.6	0.00473442
		511.675	0.0046938
		511.75	0.00465342
		511.825	0.00461328
		511.9	0.00457338
		511.975	0.00453372
		512.05	0.0044943
		512.125	0.00445512
		512.2	0.00441618
		512.275	0.00437748
		512.35	0.00433901
		512.425	0.00430078
		512.5	0.0042628
		512.575	0.00422504
		512.65	0.00418753
		512.725	0.00415026
		512.8	0.00411322
		512.875	0.00407641
		512.95	0.00403985
		513.025	0.00400352
		513.1	0.00396742
		513.175	0.00393156
		513.25	0.00389593
		513.325	0.00386054
		513.4	0.00382538
		513.475	0.00379046
		513.55	0.00375577
		513.625	0.00372131
		513.7	0.00368708
		513.775	0.00365308
		513.85	0.00361932
		513.925	0.00358578
		514	0.00355248
		514.075	0.0035194
		514.15	0.00348655
		514.225	0.00345393
		514.3	0.00342154
		514.375	0.00338937
		514.45	0.00335743
		514.525	0.00332572
		514.6	0.00329423
		514.675	0.00326297
		514.75	0.00323193
		514.825	0.00320111
		514.9	0.00317052
		514.975	0.00314014
		515.05	0.00310999
		515.125	0.00308006
		515.2	0.00305034
		515.275	0.00302083
		515.35	0.00299155
		515.425	0.0029625
		515.5	0.00293366
		515.575	0.00290503
		515.65	0.00287662
		515.725	0.00284842
		515.8	0.00282044
		515.875	0.00279267
		515.95	0.00276511
		516.025	0.00273777
		516.1	0.00271063
		516.175	0.00268371
		516.25	0.00265696
		516.325	0.00263046
		516.4	0.00260415
		516.475	0.00257806
		516.55	0.00255216
		516.625	0.00252648
		516.7	0.00250099
		516.775	0.00247571
		516.85	0.00245063
		516.925	0.00242576
		517	0.00240108
		517.075	0.0023766
		517.15	0.00235232
		517.225	0.00232823
		517.3	0.00230434
		517.375	0.00228065
		517.45	0.00225715
		517.525	0.00223385
		517.6	0.00221074
		517.675	0.00218782
		517.75	0.00216509
		517.825	0.00214255
		517.9	0.0021202
		517.975	0.00209803
		518.05	0.00207606
		518.125	0.00205427
		518.2	0.00203266
		518.275	0.00201124
		518.35	0.00199
		518.425	0.00196895
		518.5	0.00194807
		518.575	0.00192738
		518.65	0.00190686
		518.725	0.00188652
		518.8	0.00186636
		518.875	0.00184638
		518.95	0.00182657
		519.025	0.00180693
		519.1	0.00178747
		519.175	0.00176818
		519.25	0.00174906
		519.325	0.00173011
		519.4	0.00171134
		519.475	0.00169272
		519.55	0.00167428
		519.625	0.001656
		519.7	0.00163787
		519.775	0.00161992
		519.85	0.00160213
		519.925	0.00158451
		520	0.00156705
		520.075	0.00154975
		520.15	0.00153261
		520.225	0.00151562
		520.3	0.0014988
		520.375	0.00148212
		520.45	0.00146561
		520.525	0.00144925
		520.6	0.00143304
		520.675	0.00141698
		520.75	0.00140107
		520.825	0.00138532
		520.9	0.00136969
		520.975	0.00135423
		521.05	0.00133892
		521.125	0.00132375
		521.2	0.00130873
		521.275	0.00129386
		521.35	0.00127912
		521.425	0.00126453
		521.5	0.00125008
		521.575	0.00123577
		521.65	0.0012216
		521.725	0.00120757
		521.8	0.00119367
		521.875	0.00117991
		521.95	0.00116628
		522.025	0.00115279
		522.1	0.00113943
		522.175	0.00112621
		522.25	0.00111311
		522.325	0.00110015
		522.4	0.00108731
		522.475	0.00107461
		522.55	0.00106203
		522.625	0.00104957
		522.7	0.00103724
		522.775	0.00102504
		522.85	0.00101296
		522.925	0.001001
		523	0.000989163
		523.075	0.000977447
		523.15	0.000965851
		523.225	0.000954373
		523.3	0.000943013
		523.375	0.00093177
		523.45	0.000920643
		523.525	0.000909631
		523.6	0.000898732
		523.675	0.000887947
		523.75	0.000877275
		523.825	0.000866713
		523.9	0.000856262
		523.975	0.00084592
		524.05	0.000835687
		524.125	0.000825562
		524.2	0.000815543
		524.275	0.00080563
		524.35	0.000795823
		524.425	0.000786119
		524.5	0.000776519
		524.575	0.000767021
		524.65	0.000757625
		524.725	0.000748329
		524.8	0.000739133
		524.875	0.000730037
		524.95	0.000721038
		525.025	0.000712136
		525.1	0.000703331
		525.175	0.000694621
		525.25	0.000686006
		525.325	0.000677462
		525.4	0.000669035
		525.475	0.0006607
		525.55	0.000652456
		525.625	0.000644303
		525.7	0.000636239
		525.775	0.000628265
		525.85	0.000620379
		525.925	0.00061258
		526	0.000604844
		526.075	0.000597219
		526.15	0.000589678
		526.225	0.000582221
		526.3	0.000574848
		526.375	0.000567557
		526.45	0.000560348
		526.525	0.000553221
		526.6	0.000546174
		526.675	0.000539206
		526.75	0.000532318
		526.825	0.000525507
		526.9	0.000518774
		526.975	0.000512117
		527.05	0.000505514
		527.125	0.000499009
		527.2	0.00049258
		527.275	0.000486223
		527.35	0.00047994
		527.425	0.00047373
		527.5	0.00046759
		527.575	0.000461522
		527.65	0.000455524
		527.725	0.000449596
		527.8	0.000443737
		527.875	0.000437946
		527.95	0.000432222
		528.025	0.000426566
		528.1	0.000420975
		528.175	0.00041545
		528.25	0.00040999
		528.325	0.000404572
		528.4	0.000399241
		528.475	0.000393972
		528.55	0.000388743
		528.625	0.0003836
		528.7	0.000378517
		528.775	0.000373495
		528.85	0.000368533
		528.925	0.00036363
		529	0.000358786
		529.075	0.000354
		529.15	0.000349271
		529.225	0.000344599
		529.3	0.000339983
		529.375	0.000335423
		529.45	0.000330919
		529.525	0.000326468
		529.6	0.000322072
		529.675	0.000317729
		529.75	0.000313439
		529.825	0.000309201
		529.9	0.000305015
		529.975	0.00030088
		530.05	0.000296795
		530.125	0.000292761
		530.2	0.000288777
		530.275	0.000284841
		530.35	0.000280954
		530.425	0.000277115
		530.5	0.000273323
		530.575	0.000269579
		530.65	0.000265881
		530.725	0.000262229
		530.8	0.000258622
		530.875	0.000255037
		530.95	0.000251521
		531.025	0.000248049
		531.1	0.000244597
		531.175	0.000241211
		531.25	0.000237869
		531.325	0.000234568
		531.4	0.000231309
		531.475	0.000228091
		531.55	0.000224914
		531.625	0.000221777
		531.7	0.00021868
		531.775	0.000215622
		531.85	0.000212603
		531.925	0.000209622
		532	0.00020668
		532.075	0.000203775
		532.15	0.000200908
		532.225	0.000198077
		532.3	0.000195282
		532.375	0.000192524
		532.45	0.000189801
		532.525	0.000187113
		532.6	0.00018446
		532.675	0.000181818
		532.75	0.000179234
		532.825	0.000176684
		532.9	0.000174167
		532.975	0.000171682
		533.05	0.000169207
		533.125	0.000166788
		533.2	0.0001644
		533.275	0.000162044
		533.35	0.000159718
		533.425	0.000157423
		533.5	0.000155158
		533.575	0.000152923
		533.65	0.000150718
		533.725	0.000148541
		533.8	0.000146394
		533.875	0.000144274
		533.95	0.000142183
		534.025	0.00014012
		534.1	0.000138061
		534.175	0.000136052
		534.25	0.000134071
		534.325	0.000132116
		534.4	0.000130164
		534.475	0.000128262
		534.55	0.000126362
		534.625	0.000124511
		534.7	0.000122685
		534.775	0.000120884
		534.85	0.000119107
		534.925	0.000117354
		535	0.000115624
		535.075	0.000113918
		535.15	0.000112235
		535.225	0.000110575
		535.3	0.000108938
		535.375	0.000107322
		535.45	0.000105729
		535.525	0.000104158
		535.6	0.000102608
		535.675	0.000101079
		535.75	9.95715e-05
		535.825	9.80845e-05
		535.9	9.66179e-05
		535.975	9.51715e-05
		536.05	9.37221e-05
		536.125	9.23162e-05
		536.2	9.09297e-05
		536.275	8.95625e-05
		536.35	8.82141e-05
		536.425	8.68845e-05
		536.5	8.55733e-05
		536.575	8.42804e-05
		536.65	8.30055e-05
		536.725	8.17484e-05
		536.8	8.04856e-05
		536.875	7.9264e-05
		536.95	7.80596e-05
		537.025	7.6872e-05
		537.1	7.5701e-05
		537.175	7.45466e-05
		537.25	7.34084e-05
		537.325	7.22863e-05
		537.4	7.118e-05
		537.475	7.00893e-05
		537.55	6.90141e-05
		537.625	6.79541e-05
		537.7	6.68863e-05
		537.775	6.58569e-05
		537.85	6.4819e-05
		537.925	6.38191e-05
		538	6.28335e-05
		538.075	6.1862e-05
		538.15	6.09044e-05
		538.225	5.99605e-05
		538.3	5.90301e-05
		538.375	5.81131e-05
		538.45	5.72093e-05
		538.525	5.63185e-05
		538.6	5.54175e-05
		538.675	5.45529e-05
		538.75	5.37008e-05
		538.825	5.2861e-05
		538.9	5.20334e-05
		538.975	5.12178e-05
		539.05	5.0414e-05
		539.125	4.9622e-05
		539.2	4.88415e-05
		539.275	4.80724e-05
		539.35	4.73145e-05
		539.425	4.65676e-05
		539.5	4.58318e-05
		539.575	4.51067e-05
		539.65	4.43923e-05
		539.725	4.36883e-05
		539.8	4.29948e-05
		539.875	4.23114e-05
		539.95	4.16382e-05
		540.025	4.09749e-05
		540.1	4.02986e-05
		540.175	3.96553e-05
		540.25	3.90216e-05
		540.325	3.83973e-05
		540.4	3.77823e-05
		540.475	3.71765e-05
		540.55	3.65566e-05
		540.625	3.59693e-05
		540.7	3.53908e-05
		540.775	3.48209e-05
		540.85	3.42595e-05
		540.925	3.37066e-05
		541	3.3162e-05
		541.075	3.26255e-05
		541.15	3.20972e-05
		541.225	3.15768e-05
		541.3	3.10642e-05
		541.375	3.05594e-05
		541.45	3.00623e-05
		541.525	2.95727e-05
		541.6	2.90905e-05
		541.675	2.85926e-05
		541.75	2.81255e-05
		541.825	2.76655e-05
		541.9	2.72125e-05
		541.975	2.67664e-05
		542.05	2.63272e-05
		542.125	2.58946e-05
		542.2	2.54687e-05
		542.275	2.50494e-05
		542.35	2.46364e-05
		542.425	2.42068e-05
		542.5	2.3807e-05
		542.575	2.34133e-05
		542.65	2.30258e-05
		542.725	2.26442e-05
		542.8	2.22685e-05
		542.875	2.18986e-05
		542.95	2.15345e-05
		543.025	2.1176e-05
		543.1	2.08231e-05
		543.175	2.04757e-05
		543.25	2.01338e-05
		543.325	1.97971e-05
		543.4	1.94657e-05
		543.475	1.91395e-05
		543.55	1.88185e-05
		543.625	1.85024e-05
		543.7	1.81914e-05
		543.775	1.78852e-05
		543.85	1.75838e-05
		543.925	1.72872e-05
		544	1.69953e-05
		544.075	1.6708e-05
		544.15	1.64252e-05
		544.225	1.61243e-05
		544.3	1.58512e-05
		544.375	1.55825e-05
		544.45	1.5318e-05
		544.525	1.50577e-05
		544.6	1.48016e-05
		544.675	1.45495e-05
		544.75	1.43015e-05
		544.825	1.40574e-05
		544.9	1.38172e-05
		544.975	1.35808e-05
		545.05	1.33483e-05
		545.125	1.31195e-05
		545.2	1.28943e-05
		545.275	1.26728e-05
		545.35	1.24548e-05
		545.425	1.22404e-05
		545.5	1.20294e-05
		545.575	1.18218e-05
		545.65	1.16176e-05
		545.725	1.14167e-05
		545.8	1.12191e-05
		545.875	1.10247e-05
		545.95	1.08334e-05
		546.025	1.06452e-05
		546.1	1.04602e-05
		546.175	1.02781e-05
		546.25	1.0099e-05
		546.325	9.92287e-06
		546.4	9.7496e-06
		546.475	9.57918e-06
		546.55	9.41156e-06
		546.625	9.24669e-06
		546.7	9.08454e-06
		546.775	8.92507e-06
		546.85	8.76823e-06
		546.925	8.61398e-06
		547	8.46228e-06
		547.075	8.3131e-06
		547.15	8.1664e-06
		547.225	8.02213e-06
		547.3	7.85771e-06
		547.375	7.7189e-06
		547.45	7.5824e-06
		547.525	7.44817e-06
		547.6	7.31617e-06
		547.675	7.18637e-06
		547.75	7.05874e-06
		547.825	6.91006e-06
		547.9	6.78707e-06
		547.975	6.66614e-06
		548.05	6.54724e-06
		548.125	6.43034e-06
		548.2	6.3154e-06
		548.275	6.2024e-06
		548.35	6.0913e-06
		548.425	5.98208e-06
		548.5	5.8747e-06
		548.575	5.76914e-06
		548.65	5.66537e-06
		548.725	5.56336e-06
		548.8	5.46309e-06
		548.875	5.36452e-06
		548.95	5.26762e-06
		549.025	5.17238e-06
		549.1	5.07876e-06
		549.175	4.98675e-06
		549.25	4.89631e-06
		549.325	4.80741e-06
		549.4	4.69725e-06
		549.475	4.61203e-06
		549.55	4.52827e-06
		549.625	4.44594e-06
		549.7	4.36503e-06
		549.775	4.28551e-06
		549.85	4.20735e-06
		549.925	4.13054e-06
[truncated: 1 more rows]

## Sheet: PlotDat12
Source sheet	entregar - entregar	380	1.72252e-06	460	0	380	0
Plot name	ProbDens0	380.1	1.74093e-06	464	0	579.9	0
Plot Type	16	380.2	1.75953e-06	464	4
1st free col	9	380.3	1.77832e-06	460	4
Sigma Level	2	380.4	1.79731e-06	460	0
Absolute Errs	FALSE	380.5	1.8165e-06	ErrBox	ErrBox
Symbol Type	1	380.6	1.83589e-06	464	0
Inverse Plot	FALSE	380.7	1.85548e-06	468	0
Color Plot	TRUE	380.8	1.87528e-06	468	3
3D plot	FALSE	380.9	1.89529e-06	464	3
Linear	FALSE	381	1.9155e-06	464	0
Data Range	CU72:CV133	381.1	1.93593e-06	ErrBox	ErrBox
Filled Symbols	FALSE	381.2	1.95657e-06	468	0
ConcAge	FALSE	381.3	1.97743e-06	472	0
ConcSwap	FALSE	381.4	1.9985e-06	472	7
1st Symbol-row	1	381.5	2.0198e-06	468	7
		381.6	2.04132e-06	468	0
		381.7	2.06306e-06	ErrBox	ErrBox
		381.8	2.10119e-06	472	0
		381.9	2.12373e-06	476	0
		382	2.1465e-06	476	8
		382.1	2.16952e-06	472	8
		382.2	2.19278e-06	472	0
		382.3	2.23277e-06	ErrBox	ErrBox
		382.4	2.25694e-06	476	0
		382.5	2.28138e-06	480	0
		382.6	2.30609e-06	480	14
		382.7	2.33106e-06	476	14
		382.8	2.35631e-06	476	0
		382.9	2.38183e-06	ErrBox	ErrBox
		383	2.40763e-06	480	0
		383.1	2.43371e-06	484	0
		383.2	2.46008e-06	484	5
		383.3	2.48673e-06	480	5
		383.4	2.53013e-06	480	0
		383.5	2.55773e-06	ErrBox	ErrBox
		383.6	2.58564e-06	484	0
		383.7	2.61385e-06	488	0
		383.8	2.64237e-06	488	9
		383.9	2.68774e-06	484	9
		384	2.71732e-06	484	0
		384.1	2.74723e-06	ErrBox	ErrBox
		384.2	2.77748e-06	488	0
		384.3	2.80807e-06	492	0
		384.4	2.83901e-06	492	4
		384.5	2.8703e-06	488	4
		384.6	2.90194e-06	488	0
		384.7	2.93394e-06	ErrBox	ErrBox
		384.8	2.9663e-06	492	0
		384.9	2.99903e-06	496	0
		385	3.03213e-06	496	4
		385.1	3.06561e-06	492	4
		385.2	3.09946e-06	492	0
		385.3	3.13371e-06	ErrBox	ErrBox
		385.4	3.16834e-06	496	0
		385.5	3.20336e-06	500	0
		385.6	3.23879e-06	500	3
		385.7	3.27462e-06	496	3
		385.8	3.31085e-06	496	0
		385.9	3.34751e-06	ErrBox	ErrBox
		386	3.38458e-06	500	0
		386.1	3.42207e-06	504	0
		386.2	3.46e-06	504	1
		386.3	3.49835e-06	500	1
		386.4	3.53715e-06	500	0
		386.5	3.5764e-06	ErrBox	ErrBox
		386.6	3.61609e-06
		386.7	3.65624e-06
		386.8	3.69685e-06
		386.9	3.73793e-06
		387	3.77949e-06
		387.1	3.82152e-06
		387.2	3.86404e-06
		387.3	3.90704e-06
		387.4	3.95055e-06
		387.5	3.99456e-06
		387.6	4.03907e-06
		387.7	4.08411e-06
		387.8	4.12966e-06
		387.9	4.17574e-06
		388	4.22236e-06
		388.1	4.26952e-06
		388.2	4.31723e-06
		388.3	4.36549e-06
		388.4	4.41431e-06
		388.5	4.47986e-06
		388.6	4.54644e-06
		388.7	4.5978e-06
		388.8	4.64976e-06
		388.9	4.70235e-06
		389	4.75556e-06
		389.1	4.8094e-06
		389.2	4.86388e-06
		389.3	4.91901e-06
		389.4	4.9748e-06
		389.5	5.03126e-06
		389.6	5.08838e-06
		389.7	5.1462e-06
		389.8	5.2047e-06
		389.9	5.2639e-06
		390	5.32381e-06
		390.1	5.38445e-06
		390.2	5.4458e-06
		390.3	5.5079e-06
		390.4	5.57074e-06
		390.5	5.63434e-06
		390.6	5.6987e-06
		390.7	5.76384e-06
		390.8	5.82976e-06
		390.9	5.89648e-06
		391	5.96401e-06
		391.1	6.03235e-06
		391.2	6.10152e-06
		391.3	6.17152e-06
		391.4	6.24238e-06
		391.5	6.31409e-06
		391.6	6.40292e-06
		391.7	6.47684e-06
		391.8	6.55166e-06
		391.9	6.6274e-06
		392	6.70407e-06
		392.1	6.78167e-06
		392.2	6.86023e-06
		392.3	6.93976e-06
		392.4	7.02026e-06
		392.5	7.10175e-06
		392.6	7.18425e-06
		392.7	7.26776e-06
		392.8	7.3523e-06
		392.9	7.43789e-06
		393	7.52453e-06
		393.1	7.61224e-06
		393.2	7.70104e-06
		393.3	7.79094e-06
		393.4	7.88195e-06
		393.5	7.97408e-06
		393.6	8.08352e-06
		393.7	8.17836e-06
		393.8	8.27439e-06
		393.9	8.37161e-06
		394	8.47005e-06
		394.1	8.56971e-06
		394.2	8.67063e-06
		394.3	8.7728e-06
		394.4	8.87625e-06
		394.5	8.981e-06
		394.6	9.08706e-06
		394.7	9.19445e-06
		394.8	9.31967e-06
		394.9	9.43025e-06
		395	9.54223e-06
		395.1	9.65563e-06
		395.2	9.77046e-06
		395.3	9.88675e-06
		395.4	1.00045e-05
		395.5	1.01238e-05
		395.6	1.02445e-05
		395.7	1.03668e-05
		395.8	1.04906e-05
		395.9	1.06161e-05
		396	1.07431e-05
		396.1	1.08717e-05
		396.2	1.1002e-05
		396.3	1.11339e-05
		396.4	1.12675e-05
		396.5	1.14028e-05
		396.6	1.15398e-05
		396.7	1.16786e-05
		396.8	1.18191e-05
		396.9	1.19614e-05
		397	1.21056e-05
		397.1	1.22678e-05
		397.2	1.24161e-05
		397.3	1.25662e-05
		397.4	1.27183e-05
		397.5	1.28723e-05
		397.6	1.30283e-05
		397.7	1.31863e-05
		397.8	1.33463e-05
		397.9	1.35084e-05
		398	1.36726e-05
		398.1	1.38389e-05
		398.2	1.40073e-05
		398.3	1.41779e-05
		398.4	1.43506e-05
		398.5	1.45256e-05
		398.6	1.47029e-05
		398.7	1.48824e-05
		398.8	1.50643e-05
		398.9	1.52485e-05
		399	1.54351e-05
		399.1	1.5624e-05
		399.2	1.58155e-05
		399.3	1.60094e-05
		399.4	1.62057e-05
		399.5	1.64047e-05
		399.6	1.66062e-05
		399.7	1.68103e-05
		399.8	1.7017e-05
		399.9	1.72264e-05
		400	1.74385e-05
		400.1	1.76534e-05
		400.2	1.7871e-05
		400.3	1.8108e-05
		400.4	1.83318e-05
		400.5	1.85585e-05
		400.6	1.87881e-05
		400.7	1.90207e-05
		400.8	1.92563e-05
		400.9	1.9495e-05
		401	1.97367e-05
		401.1	1.99816e-05
		401.2	2.02297e-05
		401.3	2.0481e-05
		401.4	2.07356e-05
		401.5	2.09934e-05
		401.6	2.12546e-05
		401.7	2.15192e-05
		401.8	2.17873e-05
		401.9	2.20588e-05
		402	2.23338e-05
		402.1	2.26124e-05
		402.2	2.29109e-05
		402.3	2.31973e-05
		402.4	2.34874e-05
		402.5	2.37812e-05
		402.6	2.40789e-05
		402.7	2.43805e-05
		402.8	2.46859e-05
		402.9	2.49954e-05
		403	2.53088e-05
		403.1	2.56264e-05
		403.2	2.5948e-05
		403.3	2.62739e-05
		403.4	2.66039e-05
		403.5	2.69383e-05
		403.6	2.7277e-05
		403.7	2.76201e-05
		403.8	2.79676e-05
		403.9	2.83197e-05
		404	2.86763e-05
		404.1	2.90376e-05
		404.2	2.94035e-05
		404.3	2.97742e-05
		404.4	3.01497e-05
		404.5	3.05301e-05
		404.6	3.09153e-05
		404.7	3.13056e-05
		404.8	3.1701e-05
		404.9	3.21014e-05
		405	3.25071e-05
		405.1	3.29179e-05
		405.2	3.33341e-05
		405.3	3.37557e-05
		405.4	3.41828e-05
		405.5	3.46153e-05
		405.6	3.50534e-05
		405.7	3.54972e-05
		405.8	3.59467e-05
		405.9	3.64021e-05
		406	3.68632e-05
		406.1	3.73304e-05
		406.2	3.78035e-05
		406.3	3.82828e-05
		406.4	3.87682e-05
		406.5	3.92598e-05
		406.6	3.97578e-05
		406.7	4.02622e-05
		406.8	4.07894e-05
		406.9	4.13073e-05
		407	4.18482e-05
		407.1	4.238e-05
		407.2	4.29187e-05
		407.3	4.34643e-05
		407.4	4.40168e-05
		407.5	4.45765e-05
		407.6	4.51434e-05
		407.7	4.57175e-05
		407.8	4.6299e-05
		407.9	4.69042e-05
		408	4.75012e-05
		408.1	4.81058e-05
		408.2	4.87182e-05
		408.3	4.93384e-05
		408.4	4.99666e-05
		408.5	5.06027e-05
		408.6	5.1247e-05
		408.7	5.18995e-05
		408.8	5.25603e-05
		408.9	5.32296e-05
		409	5.39073e-05
		409.1	5.45937e-05
		409.2	5.52888e-05
		409.3	5.60089e-05
		409.4	5.67223e-05
		409.5	5.74446e-05
		409.6	5.81762e-05
		409.7	5.8917e-05
		409.8	5.96671e-05
		409.9	6.04268e-05
		410	6.12123e-05
		410.1	6.19918e-05
		410.2	6.27812e-05
		410.3	6.35806e-05
		410.4	6.439e-05
		410.5	6.52097e-05
		410.6	6.60396e-05
		410.7	6.68801e-05
		410.8	6.7731e-05
		410.9	6.85927e-05
		411	6.94652e-05
		411.1	7.03649e-05
		411.2	7.12599e-05
		411.3	7.21661e-05
		411.4	7.30836e-05
		411.5	7.40127e-05
		411.6	7.49534e-05
		411.7	7.59058e-05
		411.8	7.687e-05
		411.9	7.78464e-05
		412	7.88348e-05
		412.1	7.98356e-05
		412.2	8.08488e-05
		412.3	8.18746e-05
		412.4	8.29131e-05
		412.5	8.39645e-05
		412.6	8.50289e-05
		412.7	8.61065e-05
		412.8	8.72137e-05
		412.9	8.83186e-05
		413	8.94371e-05
		413.1	9.05694e-05
		413.2	9.17157e-05
		413.3	9.28761e-05
		413.4	9.40507e-05
		413.5	9.52397e-05
		413.6	9.64434e-05
		413.7	9.76617e-05
		413.8	9.8895e-05
		413.9	0.000100143
		414	0.000101424
		414.1	0.000102703
		414.2	0.000103998
		414.3	0.00010531
		414.4	0.000106637
		414.5	0.00010798
		414.6	0.000109356
		414.7	0.000110732
		414.8	0.000112125
		414.9	0.000113535
		415	0.000114962
		415.1	0.000116407
		415.2	0.000117868
		415.3	0.000119348
		415.4	0.000120845
		415.5	0.00012236
		415.6	0.000123894
		415.7	0.000125445
		415.8	0.000127016
		415.9	0.000128605
		416	0.000130213
		416.1	0.00013184
		416.2	0.000133487
		416.3	0.00013517
		416.4	0.000136856
		416.5	0.000138563
		416.6	0.00014029
		416.7	0.000142037
		416.8	0.000143822
		416.9	0.000145612
		417	0.000147422
		417.1	0.000149271
		417.2	0.000151125
		417.3	0.000153001
		417.4	0.000154916
		417.5	0.000156837
		417.6	0.00015878
		417.7	0.000160746
		417.8	0.000162752
		417.9	0.000164765
		418	0.000166802
		418.1	0.000168862
		418.2	0.000170946
		418.3	0.000173055
		418.4	0.000175188
		418.5	0.000177362
		418.6	0.000179545
		418.7	0.000181754
		418.8	0.000183988
		418.9	0.000186248
		419	0.000188533
		419.1	0.000190846
		419.2	0.000193201
		419.3	0.000195567
		419.4	0.000197961
		419.5	0.000200398
		419.6	0.000202847
		419.7	0.000205324
		419.8	0.000207829
		419.9	0.000210363
		420	0.000212926
		420.1	0.000215518
		420.2	0.000218139
		420.3	0.00022079
		420.4	0.00022347
		420.5	0.000226198
		420.6	0.00022894
		420.7	0.000231713
		420.8	0.000234518
		420.9	0.000237353
		421	0.000240221
		421.1	0.000243121
		421.2	0.000246053
		421.3	0.000249018
		421.4	0.000252016
		421.5	0.000255048
		421.6	0.000258113
		421.7	0.000261212
		421.8	0.000264346
		421.9	0.000267514
		422	0.000270734
		422.1	0.000273973
		422.2	0.000277248
		422.3	0.000280576
		422.4	0.00028394
		422.5	0.000287326
		422.6	0.000290748
		422.7	0.000294209
		422.8	0.000297707
		422.9	0.000301243
		423	0.000304818
		423.1	0.000308448
		423.2	0.000312102
		423.3	0.000315812
		423.4	0.000319546
		423.5	0.00032332
		423.6	0.000327136
		423.7	0.000330992
		423.8	0.00033489
		423.9	0.00033883
		424	0.000342813
		424.1	0.000346838
		424.2	0.000350906
		424.3	0.000355018
		424.4	0.000359174
		424.5	0.000363374
		424.6	0.000367619
		424.7	0.000371909
		424.8	0.000376245
		424.9	0.000380626
		425	0.000385054
		425.1	0.000389529
		425.2	0.000394051
		425.3	0.000398621
		425.4	0.000403239
		425.5	0.000407906
		425.6	0.000412621
		425.7	0.000417386
		425.8	0.000422201
		425.9	0.000427082
		426	0.000431999
		426.1	0.000436966
		426.2	0.000441986
		426.3	0.000447057
		426.4	0.000452182
		426.5	0.000457359
		426.6	0.00046259
		426.7	0.000467874
		426.8	0.000473214
		426.9	0.000478608
		427	0.000484058
		427.1	0.000489563
		427.2	0.000495125
		427.3	0.000500744
		427.4	0.000506437
		427.5	0.000512172
		427.6	0.000517982
		427.7	0.000523834
		427.8	0.000529747
		427.9	0.000535719
		428	0.000541752
		428.1	0.000547846
		428.2	0.000554001
		428.3	0.000560219
		428.4	0.000566499
		428.5	0.000572842
		428.6	0.000579249
		428.7	0.00058572
		428.8	0.000592256
		428.9	0.000598858
		429	0.000605525
		429.1	0.000612258
		429.2	0.000619076
		429.3	0.000625945
		429.4	0.000632882
		429.5	0.000639905
		429.6	0.000646981
		429.7	0.000654127
		429.8	0.000661344
		429.9	0.000668632
		430	0.000675992
		430.1	0.000683424
		430.2	0.000690929
		430.3	0.000698524
		430.4	0.000706178
		430.5	0.000713906
		430.6	0.00072171
		430.7	0.00072959
		430.8	0.000737547
		430.9	0.000745581
		431	0.000753693
		431.1	0.000761884
		431.2	0.000770154
		431.3	0.000778504
		431.4	0.000786935
		431.5	0.000795447
		431.6	0.000804058
		431.7	0.000812751
		431.8	0.000821513
		431.9	0.000830358
		432	0.000839289
		432.1	0.000848305
		432.2	0.000857407
		432.3	0.000866596
		432.4	0.000875872
		432.5	0.000885237
		432.6	0.000894692
		432.7	0.000904235
		432.8	0.00091387
		432.9	0.000923596
		433	0.000933413
		433.1	0.000943324
		433.2	0.000953328
		433.3	0.000963427
		433.4	0.00097362
		433.5	0.00098391
		433.6	0.000994296
		433.7	0.00100478
		433.8	0.00101536
		433.9	0.00102604
		434	0.00103682
		434.1	0.0010477
		434.2	0.00105869
		434.3	0.00106977
		434.4	0.00108096
		434.5	0.00109225
		434.6	0.00110365
		434.7	0.00111515
		434.8	0.00112676
		434.9	0.00113848
		435	0.0011503
		435.1	0.00116224
		435.2	0.00117428
		435.3	0.00118643
		435.4	0.00119872
		435.5	0.0012111
		435.6	0.00122359
		435.7	0.0012362
		435.8	0.00124892
		435.9	0.00126176
		436	0.00127472
		436.1	0.00128779
		436.2	0.00130099
		436.3	0.0013143
		436.4	0.00132774
		436.5	0.00134131
		436.6	0.001355
		436.7	0.0013688
		436.8	0.00138273
		436.9	0.00139679
		437	0.00141098
		437.1	0.00142529
		437.2	0.00143973
		437.3	0.0014543
		437.4	0.00146902
		437.5	0.00148386
		437.6	0.00149883
		437.7	0.00151395
		437.8	0.00152921
		437.9	0.00154458
		438	0.0015601
		438.1	0.00157575
		438.2	0.00159155
		438.3	0.00160748
		438.4	0.00162356
		438.5	0.00163978
		438.6	0.00165615
		438.7	0.00167268
		438.8	0.00168934
		438.9	0.00170615
		439	0.0017231
		439.1	0.00174021
		439.2	0.00175747
		439.3	0.00177488
		439.4	0.00179245
		439.5	0.00181017
		439.6	0.00182805
		439.7	0.00184608
		439.8	0.00186428
		439.9	0.00188263
		440	0.00190115
		440.1	0.00191983
		440.2	0.00193867
		440.3	0.00195768
		440.4	0.00197686
		440.5	0.0019962
		440.6	0.00201571
		440.7	0.0020354
		440.8	0.00205525
		440.9	0.0020753
		441	0.00209551
		441.1	0.00211589
		441.2	0.00213646
		441.3	0.0021572
		441.4	0.00217812
		441.5	0.00219922
		441.6	0.00222051
		441.7	0.00224198
		441.8	0.00226363
		441.9	0.00228547
		442	0.00230752
		442.1	0.00232975
		442.2	0.00235216
		442.3	0.00237477
		442.4	0.00239757
		442.5	0.00242058
		442.6	0.00244378
		442.7	0.00246717
		442.8	0.00249079
		442.9	0.00251459
		443	0.0025386
		443.1	0.00256282
		443.2	0.00258724
		443.3	0.00261187
		443.4	0.00263671
		443.5	0.00266177
		443.6	0.00268704
		443.7	0.00271252
		443.8	0.00273822
		443.9	0.00276414
		444	0.00279028
		444.1	0.00281665
		444.2	0.00284324
		444.3	0.00287005
		444.4	0.00289709
		444.5	0.00292436
		444.6	0.00295186
		444.7	0.0029796
		444.8	0.00300757
		444.9	0.00303577
		445	0.00306421
		445.1	0.0030929
		445.2	0.00312182
		445.3	0.00315099
		445.4	0.0031804
		445.5	0.00321006
		445.6	0.00323997
		445.7	0.00327012
		445.8	0.00330054
		445.9	0.0033312
		446	0.00336212
		446.1	0.0033933
		446.2	0.00342474
		446.3	0.00345644
		446.4	0.0034884
		446.5	0.00352063
		446.6	0.00355313
		446.7	0.00358589
		446.8	0.00361893
		446.9	0.00365226
		447	0.00368586
		447.1	0.00371972
		447.2	0.00375386
		447.3	0.00378828
		447.4	0.00382299
		447.5	0.00385798
		447.6	0.00389325
		447.7	0.00392882
		447.8	0.00396467
		447.9	0.00400082
		448	0.00403726
		448.1	0.004074
		448.2	0.00411104
		448.3	0.00414837
		448.4	0.00418601
		448.5	0.00422395
		448.6	0.0042622
		448.7	0.00430076
		448.8	0.00433963
		448.9	0.00437881
		449	0.00441832
		449.1	0.00445813
		449.2	0.00449826
		449.3	0.00453871
		449.4	0.00457948
		449.5	0.00462057
		449.6	0.00466199
		449.7	0.00470374
		449.8	0.00474582
		449.9	0.00478823
		450	0.00483097
		450.1	0.00487405
		450.2	0.00491747
		450.3	0.00496123
		450.4	0.00500533
		450.5	0.00504977
		450.6	0.00509455
		450.7	0.00513969
		450.8	0.00518517
		450.9	0.00523101
		451	0.00527719
		451.1	0.00532374
		451.2	0.00537063
		451.3	0.00541789
		451.4	0.00546551
		451.5	0.00551349
		451.6	0.00556185
		451.7	0.00561056
		451.8	0.00565963
		451.9	0.00570908
		452	0.00575889
		452.1	0.00580908
		452.2	0.00585965
		452.3	0.00591059
		452.4	0.0059619
		452.5	0.0060136
		452.6	0.00606567
		452.7	0.00611813
		452.8	0.00617097
		452.9	0.0062242
		453	0.00627782
		453.1	0.00633182
		453.2	0.00638621
		453.3	0.006441
		453.4	0.00649617
		453.5	0.00655174
		453.6	0.00660771
		453.7	0.00666407
		453.8	0.00672083
		453.9	0.00677799
		454	0.00683555
		454.1	0.00689351
		454.2	0.00695187
		454.3	0.00701063
		454.4	0.0070698
		454.5	0.00712939
		454.6	0.00718938
		454.7	0.00724977
		454.8	0.00731056
		454.9	0.00737177
		455	0.00743338
		455.1	0.00749541
		455.2	0.00755785
		455.3	0.00762069
		455.4	0.00768395
		455.5	0.00774763
		455.6	0.00781171
		455.7	0.00787621
		455.8	0.00794112
		455.9	0.00800645
		456	0.00807218
		456.1	0.00813834
		456.2	0.0082049
		456.3	0.00827189
		456.4	0.00833928
		456.5	0.00840709
		456.6	0.00847531
		456.7	0.00854395
		456.8	0.008613
		456.9	0.00868246
		457	0.00875233
		457.1	0.00882261
		457.2	0.00889331
		457.3	0.00896441
		457.4	0.00903593
		457.5	0.00910785
		457.6	0.00918018
		457.7	0.00925291
		457.8	0.00932605
		457.9	0.0093996
		458	0.00947354
		458.1	0.00954789
		458.2	0.00962263
		458.3	0.00969778
		458.4	0.00977332
		458.5	0.00984925
		458.6	0.00992558
		458.7	0.0100023
		458.8	0.0100794
		458.9	0.0101569
		459	0.0102348
		459.1	0.010313
		459.2	0.0103916
		459.3	0.0104706
		459.4	0.01055
		459.5	0.0106298
		459.6	0.0107099
		459.7	0.0107904
		459.8	0.0108712
		459.9	0.0109524
		460	0.011034
		460.1	0.0111159
		460.2	0.0111981
		460.3	0.0112807
		460.4	0.0113637
		460.5	0.0114469
		460.6	0.0115305
		460.7	0.0116145
		460.8	0.0116987
		460.9	0.0117833
		461	0.0118681
		461.1	0.0119533
		461.2	0.0120388
		461.3	0.0121246
		461.4	0.0122107
		461.5	0.0122971
		461.6	0.0123837
		461.7	0.0124707
		461.8	0.0125579
		461.9	0.0126453
		462	0.012733
		462.1	0.012821
		462.2	0.0129093
		462.3	0.0129977
		462.4	0.0130864
		462.5	0.0131754
		462.6	0.0132645
		462.7	0.0133539
		462.8	0.0134435
		462.9	0.0135332
		463	0.0136232
		463.1	0.0137133
		463.2	0.0138037
		463.3	0.0138942
		463.4	0.0139848
		463.5	0.0140757
		463.6	0.0141666
		463.7	0.0142577
		463.8	0.014349
		463.9	0.0144403
		464	0.0145318
		464.1	0.0146234
		464.2	0.014715
		464.3	0.0148068
		464.4	0.0148986
		464.5	0.0149906
		464.6	0.0150825
		464.7	0.0151745
		464.8	0.0152666
		464.9	0.0153587
		465	0.0154508
		465.1	0.0155429
		465.2	0.0156351
		465.3	0.0157272
		465.4	0.0158193
		465.5	0.0159114
		465.6	0.0160034
		465.7	0.0160954
		465.8	0.0161874
		465.9	0.0162792
		466	0.016371
		466.1	0.0164627
		466.2	0.0165543
		466.3	0.0166458
		466.4	0.0167371
		466.5	0.0168284
		466.6	0.0169195
		466.7	0.0170104
		466.8	0.0171011
		466.9	0.0171917
		467	0.0172821
		467.1	0.0173723
		467.2	0.0174623
		467.3	0.017552
		467.4	0.0176416
		467.5	0.0177308
		467.6	0.0178198
		467.7	0.0179086
		467.8	0.017997
		467.9	0.0180852
		468	0.0181731
		468.1	0.0182606
		468.2	0.0183478
		468.3	0.0184347
		468.4	0.0185212
		468.5	0.0186074
		468.6	0.0186932
		468.7	0.0187786
		468.8	0.0188636
		468.9	0.0189482
		469	0.0190324
		469.1	0.0191161
		469.2	0.0191994
		469.3	0.0192822
		469.4	0.0193646
		469.5	0.0194465
		469.6	0.0195279
		469.7	0.0196088
		469.8	0.0196891
		469.9	0.019769
		470	0.0198483
		470.1	0.0199271
		470.2	0.0200053
		470.3	0.0200829
		470.4	0.02016
		470.5	0.0202364
		470.6	0.0203123
		470.7	0.0203876
		470.8	0.0204622
		470.9	0.0205362
		471	0.0206095
		471.1	0.0206822
		471.2	0.0207543
		471.3	0.0208256
		471.4	0.0208963
		471.5	0.0209663
		471.6	0.0210355
		471.7	0.0211041
		471.8	0.0211719
		471.9	0.021239
		472	0.0213054
		472.1	0.021371
		472.2	0.0214358
		472.3	0.0214999
		472.4	0.0215632
		472.5	0.0216257
		472.6	0.0216874
		472.7	0.0217483
		472.8	0.0218085
		472.9	0.0218677
		473	0.0219262
		473.1	0.0219838
		473.2	0.0220406
		473.3	0.0220966
		473.4	0.0221517
		473.5	0.0222059
		473.6	0.0222593
		473.7	0.0223117
		473.8	0.0223633
		473.9	0.0224141
		474	0.0224639
		474.1	0.0225128
		474.2	0.0225609
		474.3	0.022608
		474.4	0.0226542
		474.5	0.0226995
		474.6	0.0227438
		474.7	0.0227873
		474.8	0.0228298
		474.9	0.0228713
		475	0.022912
		475.1	0.0229516
		475.2	0.0229904
		475.3	0.0230282
		475.4	0.023065
		475.5	0.0231009
		475.6	0.0231358
		475.7	0.0231698
		475.8	0.0232028
		475.9	0.0232348
		476	0.0232658
		476.1	0.0232959
		476.2	0.0233251
		476.3	0.0233532
		476.4	0.0233804
		476.5	0.0234066
		476.6	0.0234318
		476.7	0.0234561
		476.8	0.0234793
		476.9	0.0235016
		477	0.0235229
		477.1	0.0235433
		477.2	0.0235627
		477.3	0.0235811
		477.4	0.0235985
		477.5	0.0236149
		477.6	0.0236304
		477.7	0.0236449
		477.8	0.0236584
		477.9	0.023671
		478	0.0236826
		478.1	0.0236932
		478.2	0.0237029
		478.3	0.0237116
		478.4	0.0237194
		478.5	0.0237262
		478.6	0.023732
		478.7	0.0237369
		478.8	0.0237409
		478.9	0.0237439
		479	0.023746
		479.1	0.0237471
		479.2	0.0237473
		479.3	0.0237466
		479.4	0.0237449
		479.5	0.0237423
		479.6	0.0237388
		479.7	0.0237344
		479.8	0.0237291
		479.9	0.0237229
		480	0.0237157
		480.1	0.0237077
		480.2	0.0236988
		480.3	0.023689
		480.4	0.0236783
		480.5	0.0236668
		480.6	0.0236543
		480.7	0.023641
		480.8	0.0236269
		480.9	0.0236118
		481	0.023596
		481.1	0.0235792
		481.2	0.0235617
		481.3	0.0235433
		481.4	0.0235241
		481.5	0.023504
		481.6	0.0234831
		481.7	0.0234615
		481.8	0.023439
		481.9	0.0234157
		482	0.0233916
		482.1	0.0233667
		482.2	0.0233411
		482.3	0.0233147
		482.4	0.0232875
		482.5	0.0232595
		482.6	0.0232308
		482.7	0.0232013
		482.8	0.0231711
		482.9	0.0231401
		483	0.0231084
		483.1	0.0230759
		483.2	0.0230428
		483.3	0.0230089
		483.4	0.0229743
		483.5	0.0229391
		483.6	0.0229031
		483.7	0.0228664
		483.8	0.022829
		483.9	0.022791
		484	0.0227523
		484.1	0.0227129
		484.2	0.0226729
		484.3	0.0226322
		484.4	0.0225908
		484.5	0.0225488
		484.6	0.0225062
		484.7	0.022463
		484.8	0.0224191
		484.9	0.0223746
		485	0.0223295
		485.1	0.0222838
		485.2	0.0222374
		485.3	0.0221905
		485.4	0.022143
		485.5	0.022095
		485.6	0.0220463
		485.7	0.0219971
		485.8	0.0219473
		485.9	0.0218969
		486	0.021846
		486.1	0.0217945
		486.2	0.0217425
		486.3	0.02169
		486.4	0.0216369
		486.5	0.0215833
		486.6	0.0215292
		486.7	0.0214746
		486.8	0.0214194
		486.9	0.0213638
		487	0.0213077
		487.1	0.021251
		487.2	0.0211939
		487.3	0.0211363
		487.4	0.0210782
		487.5	0.0210197
		487.6	0.0209606
		487.7	0.0209011
		487.8	0.0208412
		487.9	0.0207808
		488	0.02072
		488.1	0.0206587
		488.2	0.020597
		488.3	0.0205348
		488.4	0.0204723
		488.5	0.0204093
		488.6	0.0203459
		488.7	0.020282
		488.8	0.0202178
		488.9	0.0201532
		489	0.0200882
		489.1	0.0200227
		489.2	0.0199569
		489.3	0.0198908
		489.4	0.0198242
		489.5	0.0197573
		489.6	0.01969
		489.7	0.0196223
		489.8	0.0195543
		489.9	0.0194859
		490	0.0194172
		490.1	0.0193481
		490.2	0.0192787
		490.3	0.0192089
		490.4	0.0191388
		490.5	0.0190684
		490.6	0.0189977
		490.7	0.0189267
		490.8	0.0188553
		490.9	0.0187836
		491	0.0187117
		491.1	0.0186394
		491.2	0.0185668
		491.3	0.018494
		491.4	0.0184209
		491.5	0.0183474
		491.6	0.0182738
		491.7	0.0181998
		491.8	0.0181256
		491.9	0.0180511
		492	0.0179763
		492.1	0.0179013
		492.2	0.0178261
		492.3	0.0177506
		492.4	0.0176748
		492.5	0.0175989
		492.6	0.0175227
		492.7	0.0174462
		492.8	0.0173696
		492.9	0.0172927
		493	0.0172156
		493.1	0.0171384
		493.2	0.0170609
		493.3	0.0169832
		493.4	0.0169053
		493.5	0.0168272
		493.6	0.016749
		493.7	0.0166706
		493.8	0.0165919
		493.9	0.0165132
		494	0.0164342
		494.1	0.0163551
		494.2	0.0162759
		494.3	0.0161965
		494.4	0.0161169
		494.5	0.0160372
		494.6	0.0159574
		494.7	0.0158774
		494.8	0.0157973
		494.9	0.0157171
		495	0.0156367
		495.1	0.0155563
		495.2	0.0154757
		495.3	0.015395
		495.4	0.0153143
		495.5	0.0152334
		495.6	0.0151525
		495.7	0.0150714
		495.8	0.0149903
		495.9	0.0149091
		496	0.0148279
		496.1	0.0147466
		496.2	0.0146652
		496.3	0.0145837
		496.4	0.0145022
		496.5	0.0144207
		496.6	0.0143391
		496.7	0.0142575
		496.8	0.0141759
		496.9	0.0140942
		497	0.0140125
		497.1	0.0139308
		497.2	0.0138491
		497.3	0.0137674
		497.4	0.0136857
		497.5	0.0136039
		497.6	0.0135222
		497.7	0.0134405
		497.8	0.0133589
		497.9	0.0132772
		498	0.0131956
		498.1	0.013114
		498.2	0.0130324
		498.3	0.0129509
		498.4	0.0128694
		498.5	0.012788
		498.6	0.0127067
		498.7	0.0126254
		498.8	0.0125441
		498.9	0.012463
		499	0.0123819
		499.1	0.0123009
		499.2	0.01222
		499.3	0.0121391
		499.4	0.0120584
		499.5	0.0119778
		499.6	0.0118973
		499.7	0.0118168
		499.8	0.0117365
		499.9	0.0116564
		500	0.0115763
		500.1	0.0114964
		500.2	0.0114166
		500.3	0.0113369
		500.4	0.0112574
		500.5	0.011178
		500.6	0.0110988
		500.7	0.0110197
		500.8	0.0109408
		500.9	0.0108621
		501	0.0107835
		501.1	0.0107051
		501.2	0.0106268
		501.3	0.0105488
		501.4	0.0104709
		501.5	0.0103932
		501.6	0.0103158
		501.7	0.0102385
		501.8	0.0101614
		501.9	0.0100845
		502	0.0100078
		502.1	0.00993137
		502.2	0.00985513
		502.3	0.00977911
		502.4	0.00970332
		502.5	0.00962775
		502.6	0.00955242
		502.7	0.00947732
		502.8	0.00940246
		502.9	0.00932785
		503	0.00925348
		503.1	0.00917936
		503.2	0.0091055
		503.3	0.00903189
		503.4	0.00895855
		503.5	0.00888547
		503.6	0.00881265
		503.7	0.00874011
		503.8	0.00866784
		503.9	0.00859584
		504	0.00852413
		504.1	0.0084527
		504.2	0.00838156
		504.3	0.0083107
		504.4	0.00824014
		504.5	0.00816987
		504.6	0.0080999
		504.7	0.00803023
		504.8	0.00796086
		504.9	0.0078918
		505	0.00782305
		505.1	0.0077546
		505.2	0.00768647
		505.3	0.00761866
		505.4	0.00755116
		505.5	0.00748399
		505.6	0.00741713
		505.7	0.00735061
		505.8	0.0072844
		505.9	0.00721853
		506	0.00715299
		506.1	0.00708778
		506.2	0.00702291
		506.3	0.00695838
		506.4	0.00689418
		506.5	0.00683033
		506.6	0.00676681
		506.7	0.00670364
		506.8	0.00664082
		506.9	0.00657834
		507	0.00651622
		507.1	0.00645444
		507.2	0.00639302
		507.3	0.00633194
		507.4	0.00627123
		507.5	0.00621087
		507.6	0.00615086
		507.7	0.00609121
		507.8	0.00603193
		507.9	0.005973
		508	0.00591443
		508.1	0.00585623
		508.2	0.00579839
		508.3	0.00574091
		508.4	0.0056838
		508.5	0.00562706
		508.6	0.00557068
		508.7	0.00551466
		508.8	0.00545902
		508.9	0.00540374
		509	0.00534883
		509.1	0.00529429
		509.2	0.00524012
		509.3	0.00518632
		509.4	0.00513289
		509.5	0.00507983
		509.6	0.00502714
		509.7	0.00497481
		509.8	0.00492286
		509.9	0.00487128
		510	0.00482008
		510.1	0.00476924
		510.2	0.00471878
		510.3	0.00466867
		510.4	0.00461895
		510.5	0.00456959
		510.6	0.00452061
		510.7	0.004472
		510.8	0.00442376
		510.9	0.00437589
		511	0.00432838
		511.1	0.00428125
		511.2	0.00423448
		511.3	0.00418808
		511.4	0.00414205
		511.5	0.00409638
		511.6	0.00405108
		511.7	0.00400614
		511.8	0.00396157
		511.9	0.00391737
		512	0.00387352
		512.1	0.00383004
		512.2	0.00378692
		512.3	0.00374415
		512.4	0.00370175
		512.5	0.00365971
		512.6	0.00361802
		512.7	0.00357669
		512.8	0.00353572
		512.9	0.0034951
		513	0.00345483
		513.1	0.00341492
		513.2	0.00337536
		513.3	0.00333615
		513.4	0.00329728
		513.5	0.00325876
		513.6	0.00322059
		513.7	0.00318277
		513.8	0.00314529
		513.9	0.00310815
		514	0.00307135
		514.1	0.00303489
		514.2	0.00299877
		514.3	0.00296298
		514.4	0.00292753
		514.5	0.00289242
		514.6	0.00285763
		514.7	0.00282318
		514.8	0.00278906
		514.9	0.00275526
		515	0.00272179
		515.1	0.00268864
		515.2	0.00265582
		515.3	0.0026233
		515.4	0.00259112
		515.5	0.00255926
		515.6	0.00252771
		515.7	0.00249647
		515.8	0.00246555
		515.9	0.00243494
		516	0.00240464
		516.1	0.00237465
		516.2	0.00234494
		516.3	0.00231556
		516.4	0.00228647
		516.5	0.00225769
		516.6	0.00222921
		516.7	0.00220102
		516.8	0.00217313
		516.9	0.00214553
		517	0.00211822
		517.1	0.0020912
		517.2	0.00206446
		517.3	0.00203802
		517.4	0.00201185
		517.5	0.00198597
		517.6	0.00196036
		517.7	0.00193504
		517.8	0.00190999
		517.9	0.00188521
		518	0.0018607
		518.1	0.00183647
		518.2	0.0018125
		518.3	0.00178879
		518.4	0.00176536
		518.5	0.00174218
		518.6	0.00171926
		518.7	0.0016966
		518.8	0.0016742
		518.9	0.00165205
		519	0.00163015
		519.1	0.0016085
		519.2	0.0015871
		519.3	0.00156595
		519.4	0.00154504
		519.5	0.00152437
		519.6	0.00150395
		519.7	0.00148374
		519.8	0.00146379
		519.9	0.00144407
		520	0.00142458
		520.1	0.00140533
		520.2	0.0013863
		520.3	0.0013675
		520.4	0.00134892
		520.5	0.00133057
		520.6	0.00131243
		520.7	0.00129451
		520.8	0.00127681
		520.9	0.00125931
		521	0.00124204
		521.1	0.00122498
		521.2	0.00120812
		521.3	0.00119148
		521.4	0.00117504
		521.5	0.0011588
		521.6	0.00114276
		521.7	0.00112692
		521.8	0.00111128
		521.9	0.00109583
		522	0.00108058
		522.1	0.00106551
		522.2	0.00105064
		522.3	0.00103596
		522.4	0.00102146
		522.5	0.00100714
		522.6	0.000993009
		522.7	0.000979057
		522.8	0.000965283
		522.9	0.000951685
		523	0.000938263
		523.1	0.000925014
		523.2	0.000911936
		523.3	0.000899028
		523.4	0.000886287
		523.5	0.000873712
		523.6	0.000861302
		523.7	0.000849054
		523.8	0.000836967
		523.9	0.000825039
		524	0.000813268
		524.1	0.000801654
		524.2	0.000790193
		524.3	0.000778884
		524.4	0.000767726
		524.5	0.000756717
		524.6	0.000745855
		524.7	0.000735139
		524.8	0.000724566
		524.9	0.000714137
		525	0.000703848
		525.1	0.000693698
		525.2	0.000683686
		525.3	0.000673795
		525.4	0.000664054
		525.5	0.000654446
		525.6	0.00064497
		525.7	0.000635623
		525.8	0.000626405
		525.9	0.000617314
		526	0.000608332
		526.1	0.000599491
		526.2	0.000590772
		526.3	0.000582174
		526.4	0.000573696
		526.5	0.000565336
		526.6	0.000557092
		526.7	0.000548964
		526.8	0.000540949
		526.9	0.000533047
		527	0.000525257
		527.1	0.00051756
		527.2	0.000509988
		527.3	0.000502523
		527.4	0.000495164
		527.5	0.00048791
		527.6	0.000480758
		527.7	0.000473708
		527.8	0.000466759
		527.9	0.000459909
		528	0.000453157
		528.1	0.000446502
		528.2	0.000439943
		528.3	0.000433462
		528.4	0.00042709
		528.5	0.000420811
		528.6	0.000414606
		528.7	0.000408508
		528.8	0.000402498
		528.9	0.000396575
		529	0.000390738
		529.1	0.000384986
		529.2	0.000379318
		529.3	0.000373733
		529.4	0.000368229
		529.5	0.000362806
		529.6	0.000357463
		529.7	0.000352198
		529.8	0.000347011
		529.9	0.0003419
		530	0.000336864
		530.1	0.000331903
		530.2	0.000327015
		530.3	0.000322199
		530.4	0.000317455
		530.5	0.000312781
		530.6	0.000308177
		530.7	0.000303641
		530.8	0.000299173
		530.9	0.000294756
		531	0.00029042
		531.1	0.000286134
		531.2	0.000281928
		531.3	0.000277785
		531.4	0.000273704
		531.5	0.000269685
		531.6	0.000265726
		531.7	0.000261826
		531.8	0.000257986
		531.9	0.000254203
		532	0.000250477
		532.1	0.000246807
		532.2	0.000243193
		532.3	0.000239634
		532.4	0.000236129
		532.5	0.000232676
		532.6	0.000229277
		532.7	0.000225913
		532.8	0.000222616
		532.9	0.00021937
		533	0.000216173
		533.1	0.000213009
		533.2	0.00020991
		533.3	0.000206857
		533.4	0.000203836
		533.5	0.000200877
		533.6	0.000197963
		533.7	0.000195094
		533.8	0.000192253
		533.9	0.000189471
		534	0.000186732
		534.1	0.000184019
		534.2	0.000181364
		534.3	0.00017875
		534.4	0.00017616
		534.5	0.000173626
		534.6	0.000171115
		534.7	0.000168659
		534.8	0.000166241
		534.9	0.00016386
		535	0.000161516
		535.1	0.000159192
		535.2	0.000156919
		535.3	0.000154682
		535.4	0.00015248
		535.5	0.000150295
		535.6	0.000148161
		535.7	0.000146059
		535.8	0.00014399
		535.9	0.000141953
		536	0.000139947
		536.1	0.000137957
		536.2	0.000136014
		536.3	0.000134101
		536.4	0.000132217
		536.5	0.000130362
		536.6	0.000128536
		536.7	0.000126739
		536.8	0.000124953
		536.9	0.000123211
		537	0.000121496
		537.1	0.000119807
		537.2	0.000118145
		537.3	0.000116493
		537.4	0.000114882
		537.5	0.000113296
		537.6	0.000111734
		537.7	0.000110181
		537.8	0.000108668
		537.9	0.000107163
		538	0.000105697
		538.1	0.000104254
		538.2	0.000102832
		538.3	0.000101433
		538.4	0.000100056
		538.5	9.86836e-05
		538.6	9.73326e-05
		538.7	9.60189e-05
		538.8	9.47254e-05
		538.9	9.34362e-05
		539	9.21827e-05
		539.1	9.09486e-05
		539.2	8.97334e-05
		539.3	8.8537e-05
		539.4	8.73589e-05
		539.5	8.6199e-05
		539.6	8.50568e-05
		539.7	8.39322e-05
		539.8	8.28249e-05
		539.9	8.17345e-05
		540	8.06609e-05
		540.1	7.95878e-05
		540.2	7.85473e-05
		540.3	7.75227e-05
		540.4	7.65138e-05
		540.5	7.55203e-05
		540.6	7.45262e-05
		540.7	7.35633e-05
		540.8	7.2615e-05
		540.9	7.16812e-05
		541	7.07616e-05
		541.1	6.98559e-05
		541.2	6.8964e-05
		541.3	6.80856e-05
		541.4	6.72044e-05
		541.5	6.63529e-05
		541.6	6.55141e-05
		541.7	6.46722e-05
		541.8	6.38591e-05
		541.9	6.30582e-05
		542	6.22694e-05
		542.1	6.14924e-05
		542.2	6.07271e-05
		542.3	5.99571e-05
		542.4	5.91989e-05
		542.5	5.84684e-05
		542.6	5.77488e-05
		542.7	5.70241e-05
		542.8	5.63262e-05
		542.9	5.56386e-05
		543	5.49613e-05
		543.1	5.4294e-05
		543.2	5.36366e-05
		543.3	5.29888e-05
		543.4	5.23506e-05
		543.5	5.17219e-05
		543.6	5.10862e-05
		543.7	5.04761e-05
		543.8	4.9875e-05
		543.9	4.92827e-05
		544	4.8699e-05
		544.1	4.81238e-05
		544.2	4.75411e-05
		544.3	4.69832e-05
		544.4	4.64335e-05
		544.5	4.58916e-05
		544.6	4.53576e-05
		544.7	4.48312e-05
		544.8	4.43124e-05
		544.9	4.3801e-05
		545	4.3297e-05
		545.1	4.28001e-05
		545.2	4.23103e-05
		545.3	4.18275e-05
		545.4	4.13515e-05
		545.5	4.08823e-05
		545.6	4.04196e-05
		545.7	3.99635e-05
		545.8	3.95139e-05
		545.9	3.90705e-05
		546	3.86334e-05
		546.1	3.82023e-05
		546.2	3.77773e-05
		546.3	3.73581e-05
		546.4	3.69448e-05
		546.5	3.65373e-05
		546.6	3.61353e-05
		546.7	3.57389e-05
		546.8	3.53479e-05
		546.9	3.49623e-05
		547	3.4582e-05
		547.1	3.42068e-05
		547.2	3.38368e-05
		547.3	3.34561e-05
		547.4	3.30967e-05
		547.5	3.27421e-05
		547.6	3.23923e-05
		547.7	3.20471e-05
		547.8	3.17066e-05
		547.9	3.13548e-05
		548	3.10236e-05
		548.1	3.06968e-05
		548.2	3.03743e-05
		548.3	3.00561e-05
		548.4	2.9742e-05
		548.5	2.94321e-05
		548.6	2.91261e-05
		548.7	2.88242e-05
		548.8	2.85262e-05
		548.9	2.8232e-05
		549	2.79417e-05
		549.1	2.7655e-05
		549.2	2.73721e-05
		549.3	2.70927e-05
		549.4	2.68012e-05
		549.5	2.65295e-05
		549.6	2.62612e-05
		549.7	2.59963e-05
		549.8	2.57348e-05
		549.9	2.54765e-05
		550	2.52214e-05
		550.1	2.49695e-05
		550.2	2.47207e-05
		550.3	2.4475e-05
		550.4	2.42323e-05
		550.5	2.39926e-05
		550.6	2.37558e-05
		550.7	2.35219e-05
		550.8	2.32909e-05
		550.9	2.30626e-05
		551	2.28371e-05
		551.1	2.26143e-05
		551.2	2.23783e-05
		551.3	2.21613e-05
		551.4	2.19469e-05
		551.5	2.1735e-05
		551.6	2.15256e-05
		551.7	2.13187e-05
		551.8	2.11142e-05
		551.9	2.09121e-05
		552	2.06967e-05
		552.1	2.04998e-05
		552.2	2.02896e-05
		552.3	2.00976e-05
		552.4	1.99079e-05
		552.5	1.97204e-05
		552.6	1.95189e-05
		552.7	1.93361e-05
		552.8	1.91554e-05
		552.9	1.89766e-05
		553	1.87998e-05
		553.1	1.8625e-05
		553.2	1.84521e-05
		553.3	1.82811e-05
		553.4	1.8112e-05
		553.5	1.79447e-05
		553.6	1.77792e-05
		553.7	1.76155e-05
		553.8	1.74536e-05
		553.9	1.72934e-05
		554	1.7135e-05
		554.1	1.69782e-05
		554.2	1.68073e-05
		554.3	1.66543e-05
		554.4	1.6503e-05
		554.5	1.63532e-05
		554.6	1.6205e-05
		554.7	1.60583e-05
		554.8	1.58974e-05
		554.9	1.57386e-05
		555	1.55973e-05
		555.1	1.54575e-05
		555.2	1.53191e-05
		555.3	1.51821e-05
		555.4	1.50465e-05
		555.5	1.48962e-05
		555.6	1.47637e-05
		555.7	1.46326e-05
		555.8	1.45028e-05
		555.9	1.43743e-05
		556	1.4247e-05
		556.1	1.4121e-05
		556.2	1.39963e-05
		556.3	1.38727e-05
		556.4	1.37504e-05
		556.5	1.36133e-05
		556.6	1.34939e-05
		556.7	1.33755e-05
		556.8	1.32583e-05
		556.9	1.31423e-05
		557	1.30273e-05
		557.1	1.29134e-05
		557.2	1.28006e-05
		557.3	1.26889e-05
		557.4	1.25782e-05
		557.5	1.24686e-05
		557.6	1.23599e-05
		557.7	1.22523e-05
		557.8	1.21457e-05
		557.9	1.20401e-05
		558	1.19355e-05
		558.1	1.18319e-05
		558.2	1.17292e-05
		558.3	1.16274e-05
		558.4	1.15266e-05
		558.5	1.14267e-05
		558.6	1.13277e-05
		558.7	1.12297e-05
		558.8	1.11325e-05
		558.9	1.10362e-05
		559	1.09408e-05
		559.1	1.08462e-05
		559.2	1.07525e-05
		559.3	1.06597e-05
		559.4	1.05519e-05
		559.5	1.04611e-05
		559.6	1.03711e-05
		559.7	1.02819e-05
		559.8	1.01935e-05
		559.9	1.01059e-05
		560	1.00191e-05
		560.1	9.93304e-06
		560.2	9.84773e-06
		560.3	9.76317e-06
		560.4	9.67934e-06
		560.5	9.59625e-06
		560.6	9.51388e-06
		560.7	9.43223e-06
		560.8	9.35128e-06
		560.9	9.27104e-06
		561	9.1915e-06
		561.1	9.11264e-06
		561.2	9.03446e-06
		561.3	8.95695e-06
		561.4	8.88012e-06
		561.5	8.80394e-06
		561.6	8.72841e-06
		561.7	8.65353e-06
		561.8	8.5793e-06
		561.9	8.50569e-06
		562	8.43271e-06
		562.1	8.36036e-06
		562.2	8.28862e-06
		562.3	8.21749e-06
		562.4	8.13091e-06
		562.5	8.06142e-06
		562.6	7.97667e-06
		562.7	7.90866e-06
		562.8	7.8412e-06
		562.9	7.77431e-06
		563	7.70797e-06
		563.1	7.64218e-06
		563.2	7.57692e-06
		563.3	7.51221e-06
		563.4	7.44803e-06
		563.5	7.38438e-06
		563.6	7.32125e-06
		563.7	7.25864e-06
		563.8	7.19654e-06
		563.9	7.13495e-06
		564	7.07387e-06
		564.1	7.01328e-06
		564.2	6.9532e-06
		564.3	6.87764e-06
		564.4	6.80327e-06
		564.5	6.72948e-06
		564.6	6.6726e-06
		564.7	6.61615e-06
		564.8	6.56014e-06
		564.9	6.50457e-06
		565	6.44943e-06
		565.1	6.39471e-06
		565.2	6.34042e-06
		565.3	6.28656e-06
		565.4	6.23311e-06
		565.5	6.18007e-06
		565.6	6.11147e-06
		565.7	6.05959e-06
		565.8	6.00811e-06
		565.9	5.95702e-06
		566	5.90632e-06
		566.1	5.85602e-06
		566.2	5.80611e-06
		566.3	5.75658e-06
		566.4	5.70744e-06
		566.5	5.65868e-06
		566.6	5.61029e-06
		566.7	5.56228e-06
		566.8	5.51464e-06
		566.9	5.46737e-06
		567	5.4046e-06
		567.1	5.35843e-06
		567.2	5.31261e-06
		567.3	5.26715e-06
		567.4	5.22203e-06
		567.5	5.17726e-06
		567.6	5.13284e-06
		567.7	5.08875e-06
		567.8	5.04501e-06
		567.9	5.0016e-06
		568	4.95853e-06
		568.1	4.91579e-06
		568.2	4.87338e-06
		568.3	4.8313e-06
		568.4	4.78955e-06
		568.5	4.74811e-06
		568.6	4.707e-06
		568.7	4.66621e-06
		568.8	4.62574e-06
		568.9	4.58558e-06
		569	4.54573e-06
		569.1	4.50619e-06
		569.2	4.46696e-06
		569.3	4.42804e-06
		569.4	4.38942e-06
		569.5	4.35111e-06
		569.6	4.29728e-06
		569.7	4.2599e-06
		569.8	4.22281e-06
		569.9	4.18601e-06
		570	4.14949e-06
		570.1	4.11326e-06
		570.2	4.07731e-06
		570.3	4.04163e-06
		570.4	4.00624e-06
		570.5	3.97112e-06
		570.6	3.93627e-06
		570.7	3.90169e-06
		570.8	3.86739e-06
		570.9	3.83335e-06
		571	3.79958e-06
		571.1	3.76607e-06
		571.2	3.73283e-06
		571.3	3.69984e-06
		571.4	3.66712e-06
		571.5	3.63466e-06
		571.6	3.60245e-06
		571.7	3.57049e-06
		571.8	3.53879e-06
		571.9	3.50733e-06
		572	3.47613e-06
		572.1	3.44517e-06
		572.2	3.41446e-06
		572.3	3.38399e-06
		572.4	3.35377e-06
		572.5	3.32378e-06
		572.6	3.29404e-06
		572.7	3.26453e-06
		572.8	3.23526e-06
		572.9	3.20622e-06
		573	3.17741e-06
		573.1	3.14884e-06
		573.2	3.12049e-06
		573.3	3.09237e-06
		573.4	3.06448e-06
		573.5	3.03681e-06
		573.6	3.00937e-06
		573.7	2.98215e-06
		573.8	2.95514e-06
		573.9	2.92836e-06
		574	2.90179e-06
		574.1	2.87544e-06
		574.2	2.8493e-06
		574.3	2.82337e-06
		574.4	2.79765e-06
		574.5	2.77215e-06
		574.6	2.74685e-06
		574.7	2.70592e-06
		574.8	2.68136e-06
		574.9	2.65699e-06
		575	2.63281e-06
		575.1	2.60883e-06
		575.2	2.58505e-06
		575.3	2.56145e-06
		575.4	2.53805e-06
		575.5	2.51484e-06
		575.6	2.49181e-06
		575.7	2.46897e-06
		575.8	2.44632e-06
		575.9	2.42385e-06
		576	2.40157e-06
		576.1	2.37946e-06
		576.2	2.35754e-06
		576.3	2.3358e-06
		576.4	2.31423e-06
		576.5	2.29285e-06
		576.6	2.27163e-06
		576.7	2.2506e-06
		576.8	2.22973e-06
		576.9	2.20904e-06
		577	2.18852e-06
		577.1	2.16817e-06
		577.2	2.14798e-06
		577.3	2.12797e-06
		577.4	2.10812e-06
		577.5	2.08843e-06
		577.6	2.06891e-06
		577.7	2.04955e-06
		577.8	2.03036e-06
		577.9	2.01132e-06
		578	1.99244e-06
		578.1	1.97373e-06
		578.2	1.95516e-06
		578.3	1.93676e-06
		578.4	1.91851e-06
		578.5	1.90041e-06
		578.6	1.88246e-06
		578.7	1.86467e-06
		578.8	1.84703e-06
		578.9	1.82953e-06
		579	1.81219e-06
		579.1	1.79499e-06
		579.2	1.77794e-06
		579.3	1.76103e-06
		579.4	1.74426e-06
		579.5	1.72764e-06
		579.6	1.71116e-06
		579.7	1.69483e-06
		579.8	1.67863e-06
		579.9	1.66257e-06
[truncated: 1 more rows]

## Sheet: PlotDat15
Source sheet	entregar - entregar	420	1.2782e-05	468	0	420	0
Plot name	ProbDens0	420.065	1.29413e-05	472	0	549.935	0
Plot Type	16	420.13	1.31025e-05	472	4
1st free col	9	420.195	1.32657e-05	468	4
Sigma Level	2	420.26	1.34308e-05	468	0
Absolute Errs	FALSE	420.325	1.3598e-05	ErrBox	ErrBox
Symbol Type	1	420.39	1.37671e-05	472	0
Inverse Plot	FALSE	420.455	1.39383e-05	476	0
Color Plot	TRUE	420.52	1.41116e-05	476	3
3D plot	FALSE	420.585	1.4287e-05	472	3
Linear	FALSE	420.65	1.44644e-05	472	0
Data Range	CY72:CZ95	420.715	1.46441e-05	ErrBox	ErrBox
Filled Symbols	FALSE	420.78	1.48259e-05	476	0
ConcAge	FALSE	420.845	1.50099e-05	480	0
ConcSwap	FALSE	420.91	1.51961e-05	480	10
1st Symbol-row	1	420.975	1.53845e-05	476	10
		421.04	1.55752e-05	476	0
		421.105	1.57683e-05	ErrBox	ErrBox
		421.17	1.59636e-05	480	0
		421.235	1.61614e-05	484	0
		421.3	1.63614e-05	484	1
		421.365	1.6564e-05	480	1
		421.43	1.67689e-05	480	0
		421.495	1.69763e-05	ErrBox	ErrBox
		421.56	1.71862e-05	484	0
		421.625	1.73987e-05	488	0
		421.69	1.76137e-05	488	2
		421.755	1.78313e-05	484	2
		421.82	1.80515e-05	484	0
		421.885	1.82744e-05	ErrBox	ErrBox
		421.95	1.85417e-05	488	0
		422.015	1.8771e-05	492	0
		422.08	1.9003e-05	492	2
		422.145	1.92378e-05	488	2
		422.21	1.94755e-05	488	0
		422.275	1.9716e-05	ErrBox	ErrBox
		422.34	1.99595e-05	492	0
		422.405	2.02484e-05	496	0
		422.47	2.0499e-05	496	2
		422.535	2.07526e-05	492	2
		422.6	2.10093e-05	492	0
		422.665	2.12691e-05	ErrBox	ErrBox
		422.73	2.15321e-05
		422.795	2.17982e-05
		422.86	2.20676e-05
		422.925	2.23402e-05
		422.99	2.26162e-05
		423.055	2.29374e-05
		423.12	2.32211e-05
		423.185	2.35083e-05
		423.25	2.38408e-05
		423.315	2.4136e-05
		423.38	2.44347e-05
		423.445	2.4737e-05
		423.51	2.50431e-05
		423.575	2.53528e-05
		423.64	2.56664e-05
		423.705	2.59838e-05
		423.77	2.6305e-05
		423.835	2.66302e-05
		423.9	2.69594e-05
		423.965	2.72926e-05
		424.03	2.76298e-05
		424.095	2.79711e-05
		424.16	2.83167e-05
		424.225	2.86664e-05
		424.29	2.90204e-05
		424.355	2.93787e-05
		424.42	2.97414e-05
		424.485	3.01086e-05
		424.55	3.04802e-05
		424.615	3.08563e-05
		424.68	3.12371e-05
		424.745	3.16225e-05
		424.81	3.20126e-05
		424.875	3.24074e-05
		424.94	3.28071e-05
		425.005	3.32117e-05
		425.07	3.36212e-05
		425.135	3.40357e-05
		425.2	3.44552e-05
		425.265	3.48799e-05
		425.33	3.53098e-05
		425.395	3.57449e-05
		425.46	3.61853e-05
		425.525	3.66311e-05
		425.59	3.70824e-05
		425.655	3.75391e-05
		425.72	3.80014e-05
		425.785	3.84694e-05
		425.85	3.89431e-05
		425.915	3.94652e-05
		425.98	3.99517e-05
		426.045	4.04441e-05
		426.11	4.09426e-05
		426.175	4.14471e-05
		426.24	4.19578e-05
		426.305	4.24748e-05
		426.37	4.29981e-05
		426.435	4.35279e-05
		426.5	4.40641e-05
		426.565	4.46068e-05
		426.63	4.51562e-05
		426.695	4.57123e-05
		426.76	4.62753e-05
		426.825	4.68451e-05
		426.89	4.74219e-05
		426.955	4.80058e-05
		427.02	4.85968e-05
		427.085	4.9195e-05
		427.15	4.98006e-05
		427.215	5.04136e-05
		427.28	5.1034e-05
		427.345	5.16621e-05
		427.41	5.22978e-05
		427.475	5.29414e-05
		427.54	5.36346e-05
		427.605	5.42951e-05
		427.67	5.49637e-05
		427.735	5.56405e-05
		427.8	5.63256e-05
		427.865	5.70191e-05
		427.93	5.77211e-05
		427.995	5.84317e-05
		428.06	5.9151e-05
		428.125	5.98792e-05
		428.19	6.06162e-05
		428.255	6.13623e-05
		428.32	6.21175e-05
		428.385	6.2882e-05
		428.45	6.36558e-05
		428.515	6.44391e-05
		428.58	6.5232e-05
		428.645	6.60346e-05
		428.71	6.6847e-05
		428.775	6.76694e-05
		428.84	6.85019e-05
		428.905	6.93445e-05
		428.97	7.01975e-05
		429.035	7.10609e-05
		429.1	7.19348e-05
		429.165	7.28612e-05
		429.23	7.37581e-05
		429.295	7.46661e-05
		429.36	7.55851e-05
		429.425	7.65155e-05
		429.49	7.74999e-05
		429.555	7.84544e-05
		429.62	7.94206e-05
		429.685	8.03988e-05
		429.75	8.13889e-05
		429.815	8.23911e-05
		429.88	8.34057e-05
		429.945	8.44328e-05
		430.01	8.54724e-05
		430.075	8.65248e-05
		430.14	8.75901e-05
		430.205	8.86684e-05
		430.27	8.976e-05
		430.335	9.0865e-05
		430.4	9.19835e-05
		430.465	9.31158e-05
		430.53	9.42619e-05
		430.595	9.54221e-05
		430.66	9.65964e-05
		430.725	9.77852e-05
		430.79	9.89886e-05
		430.855	0.000100207
		430.92	0.00010144
		430.985	0.000102688
		431.05	0.000103951
		431.115	0.00010523
		431.18	0.000106524
		431.245	0.000107835
		431.31	0.000109161
		431.375	0.000110504
		431.44	0.000111863
		431.505	0.000113238
		431.57	0.000114672
		431.635	0.000116083
		431.7	0.000117553
		431.765	0.000118999
		431.83	0.000120463
		431.895	0.000121945
		431.96	0.000123445
		432.025	0.000124963
		432.09	0.000126499
		432.155	0.000128055
		432.22	0.000129629
		432.285	0.000131223
		432.35	0.000132836
		432.415	0.000134469
		432.48	0.000136122
		432.545	0.000137795
		432.61	0.000139488
		432.675	0.000141202
		432.74	0.000142936
		432.805	0.000144692
		432.87	0.000146469
		432.935	0.000148268
		433	0.000150089
		433.065	0.000151932
		433.13	0.000153797
		433.195	0.000155685
		433.26	0.000157596
		433.325	0.00015953
		433.39	0.000161487
		433.455	0.000163468
		433.52	0.000165474
		433.585	0.000167503
		433.65	0.000169557
		433.715	0.000171636
		433.78	0.00017374
		433.845	0.00017587
		433.91	0.000178025
		433.975	0.000180207
		434.04	0.000182414
		434.105	0.000184649
		434.17	0.00018691
		434.235	0.000189199
		434.3	0.000191515
		434.365	0.000193859
		434.43	0.000196232
		434.495	0.000198633
		434.56	0.000201063
		434.625	0.000203522
		434.69	0.000206011
		434.755	0.000208529
		434.82	0.000211078
		434.885	0.000213658
		434.95	0.000216268
		435.015	0.00021891
		435.08	0.000221583
		435.145	0.000224289
		435.21	0.000227026
		435.275	0.000229797
		435.34	0.000232601
		435.405	0.000235438
		435.47	0.000238309
		435.535	0.000241214
		435.6	0.000244154
		435.665	0.000247129
		435.73	0.00025014
		435.795	0.000253186
		435.86	0.000256269
		435.925	0.000259388
		435.99	0.000262545
		436.055	0.000265738
		436.12	0.00026897
		436.185	0.00027224
		436.25	0.000275549
		436.315	0.000278897
		436.38	0.000282285
		436.445	0.000285712
		436.51	0.000289223
		436.575	0.000292733
		436.64	0.000296285
		436.705	0.000299879
		436.77	0.000303515
		436.835	0.000307194
		436.9	0.000310916
		436.965	0.000314682
		437.03	0.000318492
		437.095	0.000322347
		437.16	0.000326247
		437.225	0.000330193
		437.29	0.000334186
		437.355	0.000338225
		437.42	0.000342311
		437.485	0.000346445
		437.55	0.000350627
		437.615	0.000354858
		437.68	0.000359139
		437.745	0.000363469
		437.81	0.000367892
		437.875	0.000372325
		437.94	0.00037681
		438.005	0.000381347
		438.07	0.000385936
		438.135	0.000390579
		438.2	0.000395276
		438.265	0.000400027
		438.33	0.000404833
		438.395	0.000409694
		438.46	0.000414612
		438.525	0.000419586
		438.59	0.000424618
		438.655	0.00042975
		438.72	0.000434899
		438.785	0.000440108
		438.85	0.000445377
		438.915	0.000450706
		438.98	0.000456096
		439.045	0.000461548
		439.11	0.000467063
		439.175	0.00047264
		439.24	0.000478281
		439.305	0.000483987
		439.37	0.000489757
		439.435	0.000495594
		439.5	0.000501496
		439.565	0.000507466
		439.63	0.000513503
		439.695	0.000519609
		439.76	0.000525784
		439.825	0.000532029
		439.89	0.000538345
		439.955	0.000544732
		440.02	0.000551191
		440.085	0.000557722
		440.15	0.000564327
		440.215	0.000571007
		440.28	0.000577761
		440.345	0.000584591
		440.41	0.000591498
		440.475	0.000598482
		440.54	0.000605544
		440.605	0.000612685
		440.67	0.000619906
		440.735	0.000627207
		440.8	0.000634589
		440.865	0.000642053
		440.93	0.0006496
		440.995	0.000657231
		441.06	0.000664946
		441.125	0.000672747
		441.19	0.000680633
		441.255	0.000688607
		441.32	0.000696668
		441.385	0.000704819
		441.45	0.000713058
		441.515	0.000721389
		441.58	0.00072981
		441.645	0.000738324
		441.71	0.000746931
		441.775	0.000755632
		441.84	0.000764427
		441.905	0.000773319
		441.97	0.000782307
		442.035	0.000791393
		442.1	0.000800577
		442.165	0.000809861
		442.23	0.000819245
		442.295	0.000828731
		442.36	0.000838319
		442.425	0.00084801
		442.49	0.000857806
		442.555	0.000867706
		442.62	0.000877713
		442.685	0.000887827
		442.75	0.00089805
		442.815	0.000908381
		442.88	0.000918823
		442.945	0.000929375
		443.01	0.000940041
		443.075	0.000950819
		443.14	0.000961711
		443.205	0.000972719
		443.27	0.000983843
		443.335	0.000995085
		443.4	0.00100644
		443.465	0.00101792
		443.53	0.00102952
		443.595	0.00104125
		443.66	0.00105309
		443.725	0.00106506
		443.79	0.00107715
		443.855	0.00108937
		443.92	0.00110172
		443.985	0.00111419
		444.05	0.0011268
		444.115	0.00113953
		444.18	0.0011524
		444.245	0.0011654
		444.31	0.00117853
		444.375	0.0011918
		444.44	0.0012052
		444.505	0.00121875
		444.57	0.00123243
		444.635	0.00124625
		444.7	0.00126021
		444.765	0.00127431
		444.83	0.00128856
		444.895	0.00130295
		444.96	0.00131748
		445.025	0.00133217
		445.09	0.001347
		445.155	0.00136198
		445.22	0.00137711
		445.285	0.0013924
		445.35	0.00140784
		445.415	0.00142343
		445.48	0.00143917
		445.545	0.00145508
		445.61	0.00147114
		445.675	0.00148736
		445.74	0.00150374
		445.805	0.00152029
		445.87	0.00153699
		445.935	0.00155387
		446	0.0015709
		446.065	0.00158811
		446.13	0.00160548
		446.195	0.00162302
		446.26	0.00164074
		446.325	0.00165863
		446.39	0.00167669
		446.455	0.00169492
		446.52	0.00171333
		446.585	0.00173192
		446.65	0.00175069
		446.715	0.00176964
		446.78	0.00178877
		446.845	0.00180808
		446.91	0.00182758
		446.975	0.00184727
		447.04	0.00186714
		447.105	0.0018872
		447.17	0.00190745
		447.235	0.00192789
		447.3	0.00194852
		447.365	0.00196935
		447.43	0.00199038
		447.495	0.0020116
		447.56	0.00203302
		447.625	0.00205464
		447.69	0.00207646
		447.755	0.00209848
		447.82	0.0021207
		447.885	0.00214314
		447.95	0.00216578
		448.015	0.00218862
		448.08	0.00221168
		448.145	0.00223495
		448.21	0.00225843
		448.275	0.00228212
		448.34	0.00230603
		448.405	0.00233015
		448.47	0.0023545
		448.535	0.00237906
		448.6	0.00240385
		448.665	0.00242885
		448.73	0.00245409
		448.795	0.00247954
		448.86	0.00250523
		448.925	0.00253114
		448.99	0.00255728
		449.055	0.00258365
		449.12	0.00261025
		449.185	0.00263709
		449.25	0.00266417
		449.315	0.00269148
		449.38	0.00271903
		449.445	0.00274682
		449.51	0.00277485
		449.575	0.00280312
		449.64	0.00283164
		449.705	0.0028604
		449.77	0.00288941
		449.835	0.00291866
		449.9	0.00294817
		449.965	0.00297793
		450.03	0.00300794
		450.095	0.0030382
		450.16	0.00306872
		450.225	0.0030995
		450.29	0.00313054
		450.355	0.00316183
		450.42	0.00319339
		450.485	0.00322521
		450.55	0.00325729
		450.615	0.00328963
		450.68	0.00332225
		450.745	0.00335513
		450.81	0.00338828
		450.875	0.0034217
		450.94	0.0034554
		451.005	0.00348936
		451.07	0.00352361
		451.135	0.00355812
		451.2	0.00359292
		451.265	0.003628
		451.33	0.00366335
		451.395	0.00369899
		451.46	0.00373491
		451.525	0.00377111
		451.59	0.00380764
		451.655	0.00384442
		451.72	0.00388148
		451.785	0.00391884
		451.85	0.00395648
		451.915	0.00399442
		451.98	0.00403265
		452.045	0.00407117
		452.11	0.00410999
		452.175	0.00414911
		452.24	0.00418852
		452.305	0.00422824
		452.37	0.00426825
		452.435	0.00430857
		452.5	0.00434919
		452.565	0.00439011
		452.63	0.00443134
		452.695	0.00447287
		452.76	0.00451471
		452.825	0.00455686
		452.89	0.00459932
		452.955	0.00464209
		453.02	0.00468517
		453.085	0.00472857
		453.15	0.00477228
		453.215	0.0048163
		453.28	0.00486064
		453.345	0.0049053
		453.41	0.00495027
		453.475	0.00499557
		453.54	0.00504118
		453.605	0.00508711
		453.67	0.00513337
		453.735	0.00517995
		453.8	0.00522685
		453.865	0.00527408
		453.93	0.00532163
		453.995	0.00536951
		454.06	0.00541771
		454.125	0.00546624
		454.19	0.0055151
		454.255	0.00556429
		454.32	0.00561382
		454.385	0.00566367
		454.45	0.00571385
		454.515	0.00576437
		454.58	0.00581521
		454.645	0.0058664
		454.71	0.00591791
		454.775	0.00596976
		454.84	0.00602195
		454.905	0.00607447
		454.97	0.00612733
		455.035	0.00618052
		455.1	0.00623406
		455.165	0.00628793
		455.23	0.00634214
		455.295	0.00639669
		455.36	0.00645158
		455.425	0.0065068
		455.49	0.00656237
		455.555	0.00661828
		455.62	0.00667453
		455.685	0.00673112
		455.75	0.00678805
		455.815	0.00684532
		455.88	0.00690294
		455.945	0.00696089
		456.01	0.00701919
		456.075	0.00707783
		456.14	0.00713682
		456.205	0.00719614
		456.27	0.00725581
		456.335	0.00731582
		456.4	0.00737617
		456.465	0.00743687
		456.53	0.00749791
		456.595	0.00755929
		456.66	0.00762101
		456.725	0.00768307
		456.79	0.00774548
		456.855	0.00780823
		456.92	0.00787131
		456.985	0.00793474
		457.05	0.00799851
		457.115	0.00806262
		457.18	0.00812707
		457.245	0.00819186
		457.31	0.00825699
		457.375	0.00832246
		457.44	0.00838827
		457.505	0.00845441
		457.57	0.00852089
		457.635	0.00858771
		457.7	0.00865486
		457.765	0.00872235
		457.83	0.00879017
		457.895	0.00885833
		457.96	0.00892681
		458.025	0.00899563
		458.09	0.00906479
		458.155	0.00913427
		458.22	0.00920408
		458.285	0.00927422
		458.35	0.00934469
		458.415	0.00941548
		458.48	0.0094866
		458.545	0.00955804
		458.61	0.00962981
		458.675	0.00970189
		458.74	0.0097743
		458.805	0.00984703
		458.87	0.00992007
		458.935	0.00999344
		459	0.0100671
		459.065	0.0101411
		459.13	0.0102154
		459.195	0.01029
		459.26	0.0103649
		459.325	0.0104402
		459.39	0.0105157
		459.455	0.0105916
		459.52	0.0106677
		459.585	0.0107441
		459.65	0.0108209
		459.715	0.0108979
		459.78	0.0109753
		459.845	0.0110529
		459.91	0.0111308
		459.975	0.011209
		460.04	0.0112875
		460.105	0.0113663
		460.17	0.0114454
		460.235	0.0115248
		460.3	0.0116044
		460.365	0.0116843
		460.43	0.0117645
		460.495	0.0118449
		460.56	0.0119257
		460.625	0.0120066
		460.69	0.0120879
		460.755	0.0121694
		460.82	0.0122512
		460.885	0.0123332
		460.95	0.0124155
		461.015	0.0124981
		461.08	0.0125809
		461.145	0.0126639
		461.21	0.0127472
		461.275	0.0128307
		461.34	0.0129145
		461.405	0.0129985
		461.47	0.0130827
		461.535	0.0131672
		461.6	0.0132518
		461.665	0.0133368
		461.73	0.0134219
		461.795	0.0135072
		461.86	0.0135928
		461.925	0.0136786
		461.99	0.0137645
		462.055	0.0138507
		462.12	0.0139371
		462.185	0.0140237
		462.25	0.0141104
		462.315	0.0141974
		462.38	0.0142845
		462.445	0.0143718
		462.51	0.0144594
		462.575	0.014547
		462.64	0.0146349
		462.705	0.0147229
		462.77	0.0148111
		462.835	0.0148994
		462.9	0.0149879
		462.965	0.0150766
		463.03	0.0151654
		463.095	0.0152543
		463.16	0.0153434
		463.225	0.0154326
		463.29	0.0155219
		463.355	0.0156114
		463.42	0.015701
		463.485	0.0157907
		463.55	0.0158806
		463.615	0.0159705
		463.68	0.0160605
		463.745	0.0161507
		463.81	0.0162409
		463.875	0.0163313
		463.94	0.0164217
		464.005	0.0165122
		464.07	0.0166028
		464.135	0.0166934
		464.2	0.0167842
		464.265	0.0168749
		464.33	0.0169658
		464.395	0.0170567
		464.46	0.0171476
		464.525	0.0172386
		464.59	0.0173297
		464.655	0.0174208
		464.72	0.0175119
		464.785	0.017603
		464.85	0.0176941
		464.915	0.0177853
		464.98	0.0178765
		465.045	0.0179676
		465.11	0.0180588
		465.175	0.01815
		465.24	0.0182411
		465.305	0.0183323
		465.37	0.0184234
		465.435	0.0185145
		465.5	0.0186056
		465.565	0.0186966
		465.63	0.0187876
		465.695	0.0188785
		465.76	0.0189694
		465.825	0.0190602
		465.89	0.0191509
		465.955	0.0192416
		466.02	0.0193322
		466.085	0.0194227
		466.15	0.0195132
		466.215	0.0196035
		466.28	0.0196937
		466.345	0.0197839
		466.41	0.0198739
		466.475	0.0199638
		466.54	0.0200536
		466.605	0.0201433
		466.67	0.0202328
		466.735	0.0203222
		466.8	0.0204114
		466.865	0.0205005
		466.93	0.0205894
		466.995	0.0206782
		467.06	0.0207668
		467.125	0.0208553
		467.19	0.0209435
		467.255	0.0210316
		467.32	0.0211194
		467.385	0.0212071
		467.45	0.0212946
		467.515	0.0213818
		467.58	0.0214689
		467.645	0.0215557
		467.71	0.0216423
		467.775	0.0217287
		467.84	0.0218148
		467.905	0.0219007
		467.97	0.0219863
		468.035	0.0220716
		468.1	0.0221567
		468.165	0.0222416
		468.23	0.0223261
		468.295	0.0224104
		468.36	0.0224944
		468.425	0.0225781
		468.49	0.0226615
		468.555	0.0227446
		468.62	0.0228273
		468.685	0.0229098
		468.75	0.0229919
		468.815	0.0230737
		468.88	0.0231552
		468.945	0.0232363
		469.01	0.0233171
		469.075	0.0233975
		469.14	0.0234776
		469.205	0.0235573
		469.27	0.0236366
		469.335	0.0237156
		469.4	0.0237942
		469.465	0.0238723
		469.53	0.0239501
		469.595	0.0240275
		469.66	0.0241045
		469.725	0.0241811
		469.79	0.0242572
		469.855	0.0243329
		469.92	0.0244082
		469.985	0.0244831
		470.05	0.0245575
		470.115	0.0246315
		470.18	0.024705
		470.245	0.0247781
		470.31	0.0248507
		470.375	0.0249228
		470.44	0.0249945
		470.505	0.0250657
		470.57	0.0251364
		470.635	0.0252066
		470.7	0.0252763
		470.765	0.0253455
		470.83	0.0254142
		470.895	0.0254824
		470.96	0.0255501
		471.025	0.0256172
		471.09	0.0256839
		471.155	0.0257499
		471.22	0.0258155
		471.285	0.0258805
		471.35	0.025945
		471.415	0.0260089
		471.48	0.0260723
		471.545	0.0261351
		471.61	0.0261973
		471.675	0.026259
		471.74	0.02632
		471.805	0.0263805
		471.87	0.0264404
		471.935	0.0264998
		472	0.0265585
		472.065	0.0266166
		472.13	0.0266742
		472.195	0.0267311
		472.26	0.0267874
		472.325	0.0268431
		472.39	0.0268981
		472.455	0.0269526
		472.52	0.0270064
		472.585	0.0270596
		472.65	0.0271121
		472.715	0.027164
		472.78	0.0272153
		472.845	0.0272659
		472.91	0.0273158
		472.975	0.0273651
		473.04	0.0274138
		473.105	0.0274618
		473.17	0.0275091
		473.235	0.0275557
		473.3	0.0276017
		473.365	0.027647
		473.43	0.0276916
		473.495	0.0277355
		473.56	0.0277787
		473.625	0.0278213
		473.69	0.0278631
		473.755	0.0279043
		473.82	0.0279447
		473.885	0.0279845
		473.95	0.0280235
		474.015	0.0280619
		474.08	0.0280995
		474.145	0.0281364
		474.21	0.0281726
		474.275	0.0282081
		474.34	0.0282429
		474.405	0.0282769
		474.47	0.0283102
		474.535	0.0283428
		474.6	0.0283747
		474.665	0.0284059
		474.73	0.0284363
		474.795	0.0284659
		474.86	0.0284949
		474.925	0.0285231
		474.99	0.0285505
		475.055	0.0285773
		475.12	0.0286032
		475.185	0.0286285
		475.25	0.028653
		475.315	0.0286767
		475.38	0.0286997
		475.445	0.028722
		475.51	0.0287435
		475.575	0.0287643
		475.64	0.0287843
		475.705	0.0288035
		475.77	0.028822
		475.835	0.0288398
		475.9	0.0288568
		475.965	0.028873
		476.03	0.0288885
		476.095	0.0289033
		476.16	0.0289172
		476.225	0.0289305
		476.29	0.0289429
		476.355	0.0289547
		476.42	0.0289656
		476.485	0.0289758
		476.55	0.0289853
		476.615	0.028994
		476.68	0.029002
		476.745	0.0290092
		476.81	0.0290156
		476.875	0.0290213
		476.94	0.0290262
		477.005	0.0290304
		477.07	0.0290339
		477.135	0.0290366
		477.2	0.0290385
		477.265	0.0290397
		477.33	0.0290402
		477.395	0.0290399
		477.46	0.0290389
		477.525	0.0290371
		477.59	0.0290346
		477.655	0.0290314
		477.72	0.0290274
		477.785	0.0290226
		477.85	0.0290172
		477.915	0.029011
		477.98	0.0290041
		478.045	0.0289964
		478.11	0.0289881
		478.175	0.028979
		478.24	0.0289692
		478.305	0.0289586
		478.37	0.0289474
		478.435	0.0289354
		478.5	0.0289227
		478.565	0.0289093
		478.63	0.0288952
		478.695	0.0288804
		478.76	0.0288649
		478.825	0.0288487
		478.89	0.0288318
		478.955	0.0288142
		479.02	0.0287959
		479.085	0.0287769
		479.15	0.0287572
		479.215	0.0287369
		479.28	0.0287158
		479.345	0.0286941
		479.41	0.0286717
		479.475	0.0286487
		479.54	0.028625
		479.605	0.0286006
		479.67	0.0285755
		479.735	0.0285498
		479.8	0.0285235
		479.865	0.0284965
		479.93	0.0284688
		479.995	0.0284405
		480.06	0.0284116
		480.125	0.0283821
		480.19	0.0283519
		480.255	0.028321
		480.32	0.0282896
		480.385	0.0282575
		480.45	0.0282248
		480.515	0.0281915
		480.58	0.0281576
		480.645	0.0281231
		480.71	0.028088
		480.775	0.0280523
		480.84	0.028016
		480.905	0.0279792
		480.97	0.0279417
		481.035	0.0279037
		481.1	0.0278651
		481.165	0.0278259
		481.23	0.0277861
		481.295	0.0277458
		481.36	0.027705
		481.425	0.0276636
		481.49	0.0276216
		481.555	0.0275791
		481.62	0.0275361
		481.685	0.0274925
		481.75	0.0274484
		481.815	0.0274038
		481.88	0.0273586
		481.945	0.027313
		482.01	0.0272668
		482.075	0.0272201
		482.14	0.027173
		482.205	0.0271253
		482.27	0.0270771
		482.335	0.0270285
		482.4	0.0269794
		482.465	0.0269298
		482.53	0.0268797
		482.595	0.0268292
		482.66	0.0267782
		482.725	0.0267267
		482.79	0.0266748
		482.855	0.0266224
		482.92	0.0265697
		482.985	0.0265164
		483.05	0.0264628
		483.115	0.0264087
		483.18	0.0263541
		483.245	0.0262992
		483.31	0.0262439
		483.375	0.0261881
		483.44	0.026132
		483.505	0.0260754
		483.57	0.0260185
		483.635	0.0259611
		483.7	0.0259034
		483.765	0.0258453
		483.83	0.0257869
		483.895	0.0257281
		483.96	0.0256689
		484.025	0.0256093
		484.09	0.0255494
		484.155	0.0254892
		484.22	0.0254286
		484.285	0.0253676
		484.35	0.0253064
		484.415	0.0252448
		484.48	0.0251829
		484.545	0.0251206
		484.61	0.0250581
		484.675	0.0249952
		484.74	0.0249321
		484.805	0.0248686
		484.87	0.0248049
		484.935	0.0247408
		485	0.0246765
		485.065	0.0246119
		485.13	0.024547
		485.195	0.0244819
		485.26	0.0244164
		485.325	0.0243508
		485.39	0.0242848
		485.455	0.0242186
		485.52	0.0241522
		485.585	0.0240855
		485.65	0.0240186
		485.715	0.0239515
		485.78	0.0238841
		485.845	0.0238165
		485.91	0.0237487
		485.975	0.0236806
		486.04	0.0236124
		486.105	0.0235439
		486.17	0.0234753
		486.235	0.0234064
		486.3	0.0233374
		486.365	0.0232682
		486.43	0.0231987
		486.495	0.0231291
		486.56	0.0230594
		486.625	0.0229894
		486.69	0.0229193
		486.755	0.022849
		486.82	0.0227786
		486.885	0.022708
		486.95	0.0226373
		487.015	0.0225664
		487.08	0.0224953
		487.145	0.0224242
		487.21	0.0223529
		487.275	0.0222814
		487.34	0.0222099
		487.405	0.0221382
		487.47	0.0220664
		487.535	0.0219945
		487.6	0.0219224
		487.665	0.0218503
		487.73	0.021778
		487.795	0.0217057
		487.86	0.0216332
		487.925	0.0215607
		487.99	0.0214881
		488.055	0.0214154
		488.12	0.0213426
		488.185	0.0212697
		488.25	0.0211967
		488.315	0.0211237
		488.38	0.0210506
		488.445	0.0209775
		488.51	0.0209042
		488.575	0.020831
		488.64	0.0207576
		488.705	0.0206842
		488.77	0.0206108
		488.835	0.0205373
		488.9	0.0204638
		488.965	0.0203902
		489.03	0.0203166
		489.095	0.020243
		489.16	0.0201693
		489.225	0.0200957
		489.29	0.0200219
		489.355	0.0199482
		489.42	0.0198745
		489.485	0.0198007
		489.55	0.0197269
		489.615	0.0196531
		489.68	0.0195793
		489.745	0.0195055
		489.81	0.0194317
		489.875	0.0193579
		489.94	0.0192841
		490.005	0.0192103
		490.07	0.0191365
		490.135	0.0190627
		490.2	0.0189889
		490.265	0.0189152
		490.33	0.0188415
		490.395	0.0187678
		490.46	0.0186941
		490.525	0.0186204
		490.59	0.0185468
		490.655	0.0184732
		490.72	0.0183996
		490.785	0.0183261
		490.85	0.0182526
		490.915	0.0181792
		490.98	0.0181058
		491.045	0.0180324
		491.11	0.0179591
		491.175	0.0178858
		491.24	0.0178126
		491.305	0.0177394
		491.37	0.0176663
		491.435	0.0175933
		491.5	0.0175203
		491.565	0.0174473
		491.63	0.0173744
		491.695	0.0173016
		491.76	0.0172289
		491.825	0.0171562
		491.89	0.0170836
		491.955	0.0170111
		492.02	0.0169386
		492.085	0.0168663
		492.15	0.0167939
		492.215	0.0167217
		492.28	0.0166496
		492.345	0.0165775
		492.41	0.0165055
		492.475	0.0164337
		492.54	0.0163618
		492.605	0.0162901
		492.67	0.0162185
		492.735	0.016147
		492.8	0.0160755
		492.865	0.0160042
		492.93	0.015933
		492.995	0.0158618
		493.06	0.0157908
		493.125	0.0157198
		493.19	0.015649
		493.255	0.0155782
		493.32	0.0155076
		493.385	0.0154371
		493.45	0.0153667
		493.515	0.0152963
		493.58	0.0152262
		493.645	0.0151561
		493.71	0.0150861
		493.775	0.0150162
		493.84	0.0149465
		493.905	0.0148769
		493.97	0.0148074
		494.035	0.014738
		494.1	0.0146687
		494.165	0.0145996
		494.23	0.0145306
		494.295	0.0144617
		494.36	0.0143929
		494.425	0.0143243
		494.49	0.0142558
		494.555	0.0141874
		494.62	0.0141191
		494.685	0.014051
		494.75	0.013983
		494.815	0.0139152
		494.88	0.0138475
		494.945	0.0137799
		495.01	0.0137124
		495.075	0.0136451
		495.14	0.013578
		495.205	0.0135109
		495.27	0.0134441
		495.335	0.0133773
		495.4	0.0133107
		495.465	0.0132443
		495.53	0.0131779
		495.595	0.0131118
		495.66	0.0130457
		495.725	0.0129799
		495.79	0.0129141
		495.855	0.0128486
		495.92	0.0127831
		495.985	0.0127179
		496.05	0.0126528
		496.115	0.0125878
		496.18	0.012523
		496.245	0.0124583
		496.31	0.0123938
		496.375	0.0123294
		496.44	0.0122653
		496.505	0.0122012
		496.57	0.0121373
		496.635	0.0120736
		496.7	0.0120101
		496.765	0.0119467
		496.83	0.0118834
		496.895	0.0118204
		496.96	0.0117575
		497.025	0.0116947
		497.09	0.0116321
		497.155	0.0115697
		497.22	0.0115075
		497.285	0.0114454
		497.35	0.0113835
		497.415	0.0113218
		497.48	0.0112602
		497.545	0.0111988
		497.61	0.0111376
		497.675	0.0110765
		497.74	0.0110156
		497.805	0.0109549
		497.87	0.0108944
		497.935	0.010834
		498	0.0107738
		498.065	0.0107138
		498.13	0.0106539
		498.195	0.0105943
		498.26	0.0105348
		498.325	0.0104755
		498.39	0.0104163
		498.455	0.0103574
		498.52	0.0102986
		498.585	0.01024
		498.65	0.0101816
		498.715	0.0101234
		498.78	0.0100653
		498.845	0.0100075
		498.91	0.00994979
		498.975	0.00989229
		499.04	0.00983498
		499.105	0.00977785
		499.17	0.00972091
		499.235	0.00966415
		499.3	0.00960758
		499.365	0.0095512
		499.43	0.009495
		499.495	0.009439
		499.56	0.00938318
		499.625	0.00932755
		499.69	0.00927211
		499.755	0.00921686
		499.82	0.0091618
		499.885	0.00910693
		499.95	0.00905225
		500.015	0.00899777
		500.08	0.00894348
		500.145	0.00888938
		500.21	0.00883547
		500.275	0.00878176
		500.34	0.00872824
		500.405	0.00867491
		500.47	0.00862178
		500.535	0.00856885
		500.6	0.00851611
		500.665	0.00846357
		500.73	0.00841122
		500.795	0.00835908
		500.86	0.00830712
		500.925	0.00825537
		500.99	0.00820381
		501.055	0.00815246
		501.12	0.0081013
		501.185	0.00805034
		501.25	0.00799958
		501.315	0.00794901
		501.38	0.00789865
		501.445	0.00784849
		501.51	0.00779853
		501.575	0.00774877
		501.64	0.00769921
		501.705	0.00764985
		501.77	0.0076007
		501.835	0.00755174
		501.9	0.00750299
		501.965	0.00745444
		502.03	0.00740609
		502.095	0.00735795
		502.16	0.00731
		502.225	0.00726226
		502.29	0.00721473
		502.355	0.0071674
		502.42	0.00712027
		502.485	0.00707334
		502.55	0.00702662
		502.615	0.00698011
		502.68	0.00693379
		502.745	0.00688769
		502.81	0.00684178
		502.875	0.00679608
		502.94	0.00675059
		503.005	0.0067053
		503.07	0.00666022
		503.135	0.00661534
		503.2	0.00657066
		503.265	0.0065262
		503.33	0.00648193
		503.395	0.00643787
		503.46	0.00639402
		503.525	0.00635037
		503.59	0.00630693
		503.655	0.00626369
		503.72	0.00622066
		503.785	0.00617784
		503.85	0.00613522
		503.915	0.0060928
		503.98	0.00605059
		504.045	0.00600859
		504.11	0.00596679
		504.175	0.00592519
		504.24	0.0058838
		504.305	0.00584262
		504.37	0.00580164
		504.435	0.00576087
		504.5	0.0057203
		504.565	0.00567993
		504.63	0.00563977
		504.695	0.00559981
		504.76	0.00556006
		504.825	0.00552051
		504.89	0.00548117
		504.955	0.00544203
		505.02	0.00540309
		505.085	0.00536436
		505.15	0.00532583
		505.215	0.0052875
		505.28	0.00524938
		505.345	0.00521146
		505.41	0.00517374
		505.475	0.00513622
		505.54	0.00509891
		505.605	0.00506179
		505.67	0.00502488
		505.735	0.00498817
		505.8	0.00495166
		505.865	0.00491535
		505.93	0.00487924
		505.995	0.00484333
		506.06	0.00480762
		506.125	0.00477211
		506.19	0.00473679
		506.255	0.00470168
		506.32	0.00466677
		506.385	0.00463205
		506.45	0.00459753
		506.515	0.00456321
		506.58	0.00452908
		506.645	0.00449515
		506.71	0.00446142
		506.775	0.00442788
		506.84	0.00439454
		506.905	0.00436139
		506.97	0.00432844
		507.035	0.00429568
		507.1	0.00426311
		507.165	0.00423074
		507.23	0.00419856
		507.295	0.00416657
		507.36	0.00413477
		507.425	0.00410317
		507.49	0.00407175
		507.555	0.00404053
		507.62	0.00400949
		507.685	0.00397865
		507.75	0.00394799
		507.815	0.00391752
		507.88	0.00388724
		507.945	0.00385714
		508.01	0.00382724
		508.075	0.00379752
		508.14	0.00376798
		508.205	0.00373863
		508.27	0.00370946
		508.335	0.00368048
		508.4	0.00365168
		508.465	0.00362306
		508.53	0.00359463
		508.595	0.00356637
		508.66	0.0035383
		508.725	0.00351041
		508.79	0.0034827
		508.855	0.00345516
		508.92	0.00342781
		508.985	0.00340063
		509.05	0.00337363
		509.115	0.00334681
		509.18	0.00332016
		509.245	0.00329369
		509.31	0.00326739
		509.375	0.00324127
		509.44	0.00321532
		509.505	0.00318954
		509.57	0.00316393
		509.635	0.0031385
		509.7	0.00311319
		509.765	0.0030881
		509.83	0.00306318
		509.895	0.00303842
		509.96	0.00301384
		510.025	0.00298942
		510.09	0.00296516
		510.155	0.00294108
		510.22	0.00291715
		510.285	0.0028934
		510.35	0.0028698
		510.415	0.00284637
		510.48	0.0028231
		510.545	0.00279999
		510.61	0.00277705
		510.675	0.00275426
		510.74	0.00273163
		510.805	0.00270916
		510.87	0.00268685
		510.935	0.0026647
		511	0.0026427
		511.065	0.00262086
		511.13	0.00259917
		511.195	0.00257764
		511.26	0.00255626
		511.325	0.00253503
		511.39	0.00251396
		511.455	0.00249303
		511.52	0.00247226
		511.585	0.00245164
		511.65	0.00243116
		511.715	0.00241084
		511.78	0.00239066
		511.845	0.00237062
		511.91	0.00235074
		511.975	0.002331
		512.04	0.0023114
		512.105	0.00229195
		512.17	0.00227264
		512.235	0.00225347
		512.3	0.00223444
		512.365	0.00221555
		512.43	0.00219681
		512.495	0.0021782
		512.56	0.00215973
		512.625	0.0021414
		512.69	0.0021232
		512.755	0.00210514
		512.82	0.00208722
		512.885	0.00206943
		512.95	0.00205177
		513.015	0.00203425
		513.08	0.00201686
		513.145	0.0019996
		513.21	0.00198247
		513.275	0.00196547
		513.34	0.0019486
		513.405	0.00193186
		513.47	0.00191525
		513.535	0.00189876
		513.6	0.0018824
		513.665	0.00186616
		513.73	0.00185005
		513.795	0.00183406
		513.86	0.0018182
		513.925	0.00180245
		513.99	0.00178683
		514.055	0.00177133
		514.12	0.00175595
		514.185	0.00174069
		514.25	0.00172555
		514.315	0.00171052
		514.38	0.00169562
		514.445	0.00168082
		514.51	0.00166615
		514.575	0.00165159
		514.64	0.00163714
		514.705	0.00162281
		514.77	0.00160858
		514.835	0.00159448
		514.9	0.00158048
		514.965	0.00156659
		515.03	0.00155281
		515.095	0.00153914
		515.16	0.00152558
		515.225	0.00151209
		515.29	0.00149874
		515.355	0.0014855
		515.42	0.00147237
		515.485	0.00145934
		515.55	0.00144641
		515.615	0.00143359
		515.68	0.00142087
		515.745	0.00140825
		515.81	0.00139574
		515.875	0.00138332
		515.94	0.00137101
		516.005	0.00135879
		516.07	0.00134667
		516.135	0.00133465
		516.2	0.00132268
		516.265	0.00131086
		516.33	0.00129913
		516.395	0.00128749
		516.46	0.00127595
		516.525	0.0012645
		516.59	0.00125315
		516.655	0.00124188
		516.72	0.00123071
		516.785	0.00121963
		516.85	0.00120864
		516.915	0.00119774
		516.98	0.00118693
		517.045	0.00117621
		517.11	0.00116558
		517.175	0.00115503
		517.24	0.00114457
		517.305	0.0011342
		517.37	0.00112391
		517.435	0.0011137
		517.5	0.00110358
		517.565	0.00109354
		517.63	0.00108359
		517.695	0.00107372
		517.76	0.00106393
		517.825	0.00105422
		517.89	0.00104459
		517.955	0.00103504
		518.02	0.00102557
		518.085	0.00101618
		518.15	0.00100687
		518.215	0.000997632
		518.28	0.000988474
		518.345	0.000979392
		518.41	0.000970385
		518.475	0.000961454
		518.54	0.000952598
		518.605	0.000943816
		518.67	0.000935107
		518.735	0.000926471
		518.8	0.000917908
		518.865	0.000909417
		518.93	0.000900997
		518.995	0.000892647
		519.06	0.000884368
		519.125	0.000876159
		519.19	0.000868019
		519.255	0.000859948
		519.32	0.000851945
		519.385	0.000844009
		519.45	0.000836141
		519.515	0.000828339
		519.58	0.000820603
		519.645	0.000812933
		519.71	0.000805288
		519.775	0.000797748
		519.84	0.000790273
		519.905	0.000782862
		519.97	0.000775513
		520.035	0.000768227
		520.1	0.000761003
		520.165	0.000753841
		520.23	0.00074674
		520.295	0.000739699
		520.36	0.000732719
		520.425	0.000725798
		520.49	0.000718937
		520.555	0.000712134
		520.62	0.00070539
		520.685	0.000698704
		520.75	0.000692075
		520.815	0.000685503
		520.88	0.000678947
		520.945	0.000672489
		521.01	0.000666086
		521.075	0.000659739
		521.14	0.000653447
		521.205	0.000647208
		521.27	0.000641024
		521.335	0.000634894
		521.4	0.000628816
		521.465	0.000622791
		521.53	0.000616818
		521.595	0.000610897
		521.66	0.000605027
		521.725	0.000599209
		521.79	0.000593441
		521.855	0.000587723
		521.92	0.000582055
		521.985	0.000576437
		522.05	0.000570867
		522.115	0.000565346
		522.18	0.000559874
		522.245	0.000554449
		522.31	0.000549072
		522.375	0.000543742
		522.44	0.000538458
		522.505	0.000533221
		522.57	0.00052803
		522.635	0.000522884
		522.7	0.000517784
		522.765	0.000512729
		522.83	0.000507718
		522.895	0.000502752
		522.96	0.000497829
		523.025	0.00049295
		523.09	0.000488113
		523.155	0.00048332
		523.22	0.000478569
		523.285	0.00047386
		523.35	0.000469193
		523.415	0.000464568
		523.48	0.000459983
		523.545	0.000455439
		523.61	0.000450936
		523.675	0.000446473
		523.74	0.00044205
		523.805	0.000437666
		523.87	0.000433321
		523.935	0.000429015
		524	0.000424747
		524.065	0.000420518
		524.13	0.000416327
		524.195	0.000412173
		524.26	0.000408057
		524.325	0.000403977
		524.39	0.000399935
		524.455	0.000395928
		524.52	0.000391958
		524.585	0.000388024
		524.65	0.000384125
		524.715	0.000380261
		524.78	0.000376433
		524.845	0.000372639
		524.91	0.000368879
		524.975	0.000365153
		525.04	0.000361462
		525.105	0.000357803
		525.17	0.000354178
		525.235	0.000350587
		525.3	0.000346986
		525.365	0.00034346
		525.43	0.000339967
		525.495	0.000336505
		525.56	0.000333075
		525.625	0.000329677
		525.69	0.000326309
		525.755	0.000322973
		525.82	0.000319667
		525.885	0.000316391
		525.95	0.000313146
		526.015	0.000309889
		526.08	0.000306705
		526.145	0.000303549
		526.21	0.000300423
		526.275	0.000297326
		526.34	0.000294257
		526.405	0.000291217
		526.47	0.000288205
		526.535	0.00028522
		526.6	0.000282264
		526.665	0.000279335
		526.73	0.000276433
		526.795	0.000273558
		526.86	0.000270711
		526.925	0.000267889
		526.99	0.000265094
		527.055	0.000262326
		527.12	0.000259583
		527.185	0.000256866
		527.25	0.000254174
		527.315	0.000251508
		527.38	0.000248867
		527.445	0.00024625
		527.51	0.000243659
		527.575	0.000241092
		527.64	0.000238549
		527.705	0.00023603
		527.77	0.000233535
		527.835	0.000231064
		527.9	0.000228616
		527.965	0.000226191
		528.03	0.000223789
		528.095	0.000221411
		528.16	0.000219055
		528.225	0.000216721
		528.29	0.000214369
		528.355	0.000212081
		528.42	0.000209815
		528.485	0.00020757
		528.55	0.000205306
		528.615	0.000203106
		528.68	0.000200926
		528.745	0.000198768
		528.81	0.000196631
		528.875	0.000194514
		528.94	0.000192417
		529.005	0.000190341
		529.07	0.000188285
		529.135	0.000186249
		529.2	0.000184233
		529.265	0.000182236
		529.33	0.000180258
		529.395	0.0001783
		529.46	0.000176361
		529.525	0.000174441
		529.59	0.00017254
		529.655	0.000170657
		529.72	0.000168793
		529.785	0.000166947
		529.85	0.000165119
		529.915	0.000163309
		529.98	0.000161517
		530.045	0.000159742
		530.11	0.000157985
		530.175	0.000156246
		530.24	0.000154523
		530.305	0.000152818
		530.37	0.00015113
		530.435	0.000149458
		530.5	0.000147803
		530.565	0.000146165
		530.63	0.000144542
		530.695	0.000142936
		530.76	0.000141346
		530.825	0.000139772
		530.89	0.000138173
		530.955	0.000136632
		531.02	0.000135105
		531.085	0.000133553
		531.15	0.000132059
		531.215	0.000130579
		531.28	0.000129114
		531.345	0.000127665
		531.41	0.000126229
		531.475	0.000124809
		531.54	0.000123402
		531.605	0.00012201
		531.67	0.000120632
		531.735	0.000119268
		531.8	0.000117918
		531.865	0.000116582
		531.93	0.00011526
		531.995	0.00011395
		532.06	0.000112655
		532.125	0.000111372
		532.19	0.000110103
		532.255	0.000108847
		532.32	0.000107603
		532.385	0.000106373
		532.45	0.000105155
		532.515	0.00010395
		532.58	0.000102757
		532.645	0.000101577
		532.71	0.000100409
		532.775	9.92525e-05
		532.84	9.81084e-05
		532.905	9.69763e-05
		532.97	9.5856e-05
		533.035	9.47473e-05
		533.1	9.36502e-05
		533.165	9.25647e-05
		533.23	9.14904e-05
		533.295	9.04275e-05
		533.36	8.93757e-05
		533.425	8.8335e-05
		533.49	8.73052e-05
		533.555	8.62863e-05
		533.62	8.52782e-05
		533.685	8.42807e-05
		533.75	8.32937e-05
		533.815	8.23173e-05
		533.88	8.13512e-05
		533.945	8.03953e-05
		534.01	7.94497e-05
		534.075	7.85141e-05
		534.14	7.75475e-05
		534.205	7.66327e-05
		534.27	7.57277e-05
		534.335	7.48324e-05
		534.4	7.39057e-05
		534.465	7.30305e-05
		534.53	7.21233e-05
		534.595	7.12678e-05
		534.66	7.04216e-05
		534.725	6.95845e-05
		534.79	6.87564e-05
		534.855	6.79372e-05
		534.92	6.71268e-05
		534.985	6.63252e-05
		535.05	6.55323e-05
		535.115	6.4748e-05
		535.18	6.39722e-05
		535.245	6.32048e-05
		535.31	6.24458e-05
		535.375	6.1695e-05
		535.44	6.09524e-05
		535.505	6.0218e-05
		535.57	5.94916e-05
		535.635	5.87731e-05
		535.7	5.80625e-05
		535.765	5.73597e-05
		535.83	5.66647e-05
		535.895	5.59773e-05
		535.96	5.52975e-05
		536.025	5.46252e-05
		536.09	5.39199e-05
		536.155	5.32637e-05
		536.22	5.26147e-05
		536.285	5.19729e-05
		536.35	5.13383e-05
		536.415	5.07106e-05
		536.48	5.009e-05
		536.545	4.94762e-05
		536.61	4.88693e-05
		536.675	4.82692e-05
		536.74	4.76757e-05
		536.805	4.70474e-05
		536.87	4.64681e-05
		536.935	4.58953e-05
		537	4.53289e-05
		537.065	4.47689e-05
		537.13	4.42151e-05
		537.195	4.36677e-05
		537.26	4.31263e-05
		537.325	4.25911e-05
		537.39	4.2062e-05
		537.455	4.15388e-05
		537.52	4.10216e-05
		537.585	4.05102e-05
		537.65	4.00047e-05
		537.715	3.94641e-05
		537.78	3.89709e-05
		537.845	3.84834e-05
		537.91	3.80014e-05
		537.975	3.7525e-05
		538.04	3.7054e-05
		538.105	3.65883e-05
		538.17	3.61281e-05
		538.235	3.56731e-05
		538.3	3.52233e-05
		538.365	3.47788e-05
		538.43	3.43393e-05
		538.495	3.39049e-05
		538.56	3.34756e-05
		538.625	3.30512e-05
		538.69	3.26318e-05
		538.755	3.22172e-05
		538.82	3.18074e-05
		538.885	3.14024e-05
		538.95	3.10022e-05
		539.015	3.06066e-05
		539.08	3.02156e-05
		539.145	2.98292e-05
		539.21	2.94473e-05
		539.275	2.90699e-05
		539.34	2.8697e-05
		539.405	2.83284e-05
		539.47	2.79642e-05
		539.535	2.76042e-05
		539.6	2.72485e-05
		539.665	2.68971e-05
		539.73	2.65498e-05
		539.795	2.62066e-05
		539.86	2.58674e-05
		539.925	2.55323e-05
		539.99	2.52012e-05
		540.055	2.48326e-05
		540.12	2.45102e-05
		540.185	2.41916e-05
		540.25	2.38769e-05
		540.315	2.35659e-05
		540.38	2.32586e-05
		540.445	2.29551e-05
		540.51	2.26551e-05
		540.575	2.23588e-05
		540.64	2.2066e-05
		540.705	2.17768e-05
		540.77	2.14911e-05
		540.835	2.12088e-05
		540.9	2.09299e-05
		540.965	2.06544e-05
		541.03	2.03822e-05
		541.095	2.01133e-05
		541.16	1.98478e-05
		541.225	1.95854e-05
		541.29	1.93262e-05
		541.355	1.90702e-05
		541.42	1.88174e-05
		541.485	1.85676e-05
		541.55	1.83208e-05
		541.615	1.80771e-05
		541.68	1.77952e-05
		541.745	1.75583e-05
		541.81	1.73243e-05
		541.875	1.70931e-05
		541.94	1.68648e-05
		542.005	1.66393e-05
		542.07	1.64166e-05
		542.135	1.61966e-05
		542.2	1.59794e-05
		542.265	1.57648e-05
		542.33	1.5553e-05
		542.395	1.53437e-05
		542.46	1.51371e-05
		542.525	1.4933e-05
		542.59	1.47315e-05
		542.655	1.45324e-05
		542.72	1.43359e-05
		542.785	1.41418e-05
		542.85	1.39502e-05
		542.915	1.3761e-05
		542.98	1.35741e-05
		543.045	1.33896e-05
		543.11	1.32074e-05
		543.175	1.30275e-05
		543.24	1.28499e-05
		543.305	1.26745e-05
		543.37	1.25014e-05
		543.435	1.23304e-05
		543.5	1.21616e-05
		543.565	1.19949e-05
		543.63	1.18304e-05
		543.695	1.16679e-05
		543.76	1.15076e-05
		543.825	1.13492e-05
		543.89	1.11929e-05
		543.955	1.10386e-05
		544.02	1.08863e-05
		544.085	1.07359e-05
		544.15	1.05874e-05
		544.215	1.04409e-05
		544.28	1.02962e-05
		544.345	1.01534e-05
		544.41	1.00124e-05
		544.475	9.87329e-06
		544.54	9.73595e-06
		544.605	9.60037e-06
		544.67	9.46656e-06
		544.735	9.33447e-06
		544.8	9.2041e-06
		544.865	9.07543e-06
		544.93	8.94842e-06
		544.995	8.82308e-06
		545.06	8.69936e-06
		545.125	8.57726e-06
		545.19	8.45676e-06
		545.255	8.33783e-06
		545.32	8.22046e-06
		545.385	8.10462e-06
		545.45	7.99031e-06
		545.515	7.8775e-06
		545.58	7.76617e-06
		545.645	7.65631e-06
		545.71	7.5479e-06
		545.775	7.44092e-06
		545.84	7.33535e-06
		545.905	7.23118e-06
		545.97	7.12839e-06
		546.035	7.02696e-06
		546.1	6.92687e-06
		546.165	6.82812e-06
		546.23	6.73068e-06
		546.295	6.63454e-06
		546.36	6.53968e-06
		546.425	6.44608e-06
		546.49	6.35374e-06
		546.555	6.26263e-06
		546.62	6.17274e-06
		546.685	6.08406e-06
		546.75	5.99656e-06
		546.815	5.91024e-06
		546.88	5.82508e-06
		546.945	5.74107e-06
		547.01	5.65819e-06
		547.075	5.57643e-06
		547.14	5.49578e-06
		547.205	5.41621e-06
		547.27	5.33772e-06
		547.335	5.2603e-06
		547.4	5.18392e-06
		547.465	5.10859e-06
		547.53	5.03427e-06
		547.595	4.96097e-06
		547.66	4.88867e-06
		547.725	4.81735e-06
		547.79	4.74701e-06
		547.855	4.67763e-06
		547.92	4.6092e-06
		547.985	4.5417e-06
		548.05	4.47513e-06
		548.115	4.40948e-06
		548.18	4.34472e-06
		548.245	4.28086e-06
		548.31	4.21788e-06
		548.375	4.15577e-06
		548.44	4.09451e-06
		548.505	4.0341e-06
		548.57	3.97452e-06
		548.635	3.91577e-06
		548.7	3.85784e-06
		548.765	3.8007e-06
		548.83	3.74436e-06
		548.895	3.68881e-06
		548.96	3.63403e-06
		549.025	3.58001e-06
		549.09	3.52674e-06
		549.155	3.47422e-06
		549.22	3.42243e-06
		549.285	3.37137e-06
		549.35	3.32102e-06
		549.415	3.27138e-06
		549.48	3.22243e-06
		549.545	3.17417e-06
		549.61	3.12659e-06
		549.675	3.07968e-06
		549.74	3.03344e-06
		549.805	2.98784e-06
		549.87	2.94289e-06
		549.935	2.89857e-06
[truncated: 1 more rows]

## Sheet: PlotDat8
Source sheet	entregar - entregar	0.584828	0.075508	0.554888	0.072	0.557657	0.0723004	0.597199	0.0761501	0.591678	0.0759903	0.596972	0.0762919	0.621045	0.0764823	0.609817	0.0769176	0.621917	0.0773392	0.630892	0.077391	0.613409	0.0770373	0.602436	0.0775109	0.637169	0.077564	0.619972	0.0773499	0.60275	0.0776222	0.626753	0.0773423	0.610787	0.0778518	0.620036	0.0779758	0.616227	0.0781187	0.63145	0.0782988
Plot name	Concordia0	0.581002	0.0755303	0.554888	0.072	0.565346	0.0731324	0.597071	0.0762833	0.591527	0.0761188	0.596834	0.0764377	0.620888	0.0766209	0.609653	0.077077	0.621762	0.0775027	0.6307	0.0775709	0.61321	0.0771708	0.602301	0.0776551	0.637049	0.0776884	0.619832	0.0774696	0.602607	0.0777533	0.626561	0.0774895	0.610659	0.0779895	0.619882	0.0781115	0.616097	0.078258	0.631309	0.0784227
Plot Type	1	0.583586	0.0755686	0.557737	0.0723091	0.573073	0.0739651	0.596705	0.0764013	0.591088	0.0762312	0.596437	0.0765667	0.620438	0.0767368	0.609177	0.0772211	0.621324	0.0776435	0.63014	0.077734	0.612625	0.0772921	0.60192	0.0777814	0.636706	0.0777962	0.619428	0.0775729	0.602202	0.0778614	0.625995	0.0776263	0.610299	0.0781076	0.619451	0.078219	0.615729	0.0783783	0.630911	0.0785214
1st free col	43	0.610183	0.075792	0.56059	0.0726183	0.580838	0.0747984	0.596108	0.0765019	0.590375	0.0763244	0.595791	0.0766761	0.619709	0.076827	0.608398	0.077347	0.620611	0.077759	0.629222	0.077877	0.611671	0.0773979	0.601298	0.0778872	0.636148	0.0778852	0.618771	0.0776572	0.601547	0.0779436	0.625066	0.0777499	0.609714	0.0782036	0.618755	0.0782954	0.615131	0.0784771	0.630269	0.0785922
Sigma Level	1	0.593624	0.0762865	0.563449	0.0729275	0.588642	0.0756324	0.595291	0.0765832	0.589405	0.0763961	0.594907	0.0767641	0.61872	0.0768889	0.607332	0.0774522	0.619638	0.0778468	0.627966	0.0779973	0.610372	0.0774852	0.600448	0.0779705	0.635386	0.0779539	0.617878	0.0777201	0.600659	0.0779975	0.623791	0.077858	0.608914	0.0782758	0.617812	0.0783386	0.614314	0.0785525	0.629398	0.0786333
Absolute Errs	TRUE	0.607215	0.0763411	0.566314	0.0732369	0.596484	0.076467	0.594271	0.0766436	0.588207	0.076444	0.593802	0.0768287	0.617498	0.0769209	0.605998	0.0775348	0.618423	0.0779054	0.626396	0.0780924	0.608766	0.0775518	0.599387	0.0780296	0.634433	0.0780007	0.616775	0.0777598	0.599562	0.0780218	0.622197	0.0779485	0.607917	0.0783228	0.616649	0.0783473	0.613294	0.0786031	0.628323	0.0786435
Symbol Type	1	0.611804	0.0767052	0.569183	0.0735464	0.604365	0.0773023	0.593067	0.0766819	0.586812	0.0764671	0.592499	0.0768689	0.616076	0.0769221	0.604425	0.077593	0.61699	0.0779335	0.624541	0.0781605	0.606894	0.0775957	0.598135	0.0780636	0.63331	0.0780248	0.615491	0.0777753	0.598287	0.0780158	0.620314	0.0780195	0.60674	0.0783436	0.615296	0.0783215	0.612091	0.0786278	0.627074	0.0786225
Inverse Plot	FALSE	0.599063	0.0767227	0.572058	0.0738559	0.612285	0.0781382	0.591702	0.0766973	0.585259	0.0764646	0.591022	0.0768837	0.614494	0.0768925	0.60264	0.0776258	0.615366	0.0779307	0.622438	0.0782003	0.604809	0.0776158	0.596717	0.0780715	0.632037	0.0780257	0.614062	0.0777663	0.596869	0.0779796	0.618178	0.0780698	0.605408	0.0783378	0.613792	0.0782618	0.610728	0.0786262	0.625684	0.0785709
Color Plot	TRUE	0.589587	0.0767312	0.574938	0.0741655	0.620244	0.0789747	0.590204	0.0766896	0.583589	0.0764367	0.589401	0.0768729	0.612795	0.0768329	0.600681	0.0776326	0.613584	0.0778968	0.620129	0.078211	0.602567	0.0776116	0.59516	0.0780534	0.63064	0.0780035	0.612525	0.0777328	0.595345	0.0779143	0.615831	0.0780983	0.603946	0.0783055	0.612176	0.0781697	0.609232	0.0785983	0.624191	0.0784901
3D plot	FALSE	0.625639	0.0768342	0.577823	0.0744752	0.628242	0.0798119	0.588601	0.0766588	0.581849	0.076384	0.587666	0.0768368	0.611024	0.0767449	0.598584	0.0776131	0.611678	0.0778327	0.617657	0.0781923	0.600229	0.0775831	0.593494	0.0780096	0.629145	0.0779585	0.610924	0.0776759	0.593757	0.0778216	0.613319	0.0781045	0.602382	0.0782474	0.610494	0.0780479	0.607632	0.0785447	0.622636	0.0783823
Linear	FALSE	0.61015	0.0768725	0.580713	0.0747851	0.636279	0.0806498	0.586925	0.0766057	0.580086	0.076308	0.585852	0.0767759	0.60923	0.0766309	0.59639	0.0775679	0.609685	0.0777396	0.615072	0.0781447	0.59786	0.0775311	0.591753	0.0779408	0.627582	0.0778916	0.609302	0.077597	0.59215	0.077704	0.610691	0.0780882	0.600747	0.0781646	0.60879	0.0778997	0.605959	0.0784664	0.621061	0.0782505
Data Range	CB37:CF54	0.593016	0.0769103	0.583609	0.075095	IsoLine	IsoLine	0.585208	0.0765312	0.578347	0.0762108	0.583993	0.0766916	0.607462	0.076494	0.594143	0.0774977	0.607643	0.0776193	0.612422	0.0780691	0.595523	0.0774571	0.589969	0.0778486	0.625981	0.0778041	0.607703	0.0774984	0.590566	0.0775647	0.607997	0.0780498	0.599072	0.0780587	0.607111	0.077729	0.604246	0.0783649	0.61951	0.0780982
Filled Symbols	FALSE	0.607341	0.0769514	0.58651	0.0754049			0.583483	0.0764368	0.576682	0.0760951	0.582127	0.0765854	0.605768	0.0763379	0.591885	0.0774039	0.605594	0.077474	0.609761	0.077967	0.593283	0.0773631	0.588178	0.0777345	0.624374	0.0776977	0.606171	0.0773827	0.589049	0.0774076	0.605291	0.07799	0.597391	0.0779318	0.605504	0.0775406	0.602526	0.0782422	0.618025	0.0779296
ConcAge	TRUE	0.598727	0.0769783	0.589417	0.075715			0.581784	0.0763243	0.575134	0.0759639	0.58029	0.0764594	0.604195	0.076167	0.589662	0.0772883	0.603576	0.0773067	0.60714	0.0778403	0.591201	0.0772516	0.586414	0.077601	0.622791	0.0775746	0.604747	0.0772531	0.58764	0.077237	0.602624	0.07791	0.595736	0.0777863	0.604012	0.0773395	0.600832	0.0781007	0.616645	0.0777493
ConcSwap	FALSE	0.60972	0.0770781	0.592329	0.0760252			0.580145	0.076196	0.573746	0.0758209	0.578516	0.0763161	0.602785	0.0759858	0.587515	0.0771533	0.601629	0.0771207	0.604609	0.0776915	0.589333	0.0771256	0.584712	0.0774505	0.621264	0.077437	0.60347	0.0771131	0.586377	0.0770574	0.600049	0.0778114	0.594139	0.0776251	0.602675	0.0771314	0.599198	0.0779432	0.61541	0.0775622
1st Symbol-row	1	0.603888	0.0772758	0.595246	0.0763354			0.578597	0.0760542	0.572556	0.07567	0.576841	0.0761582	0.601577	0.0757994	0.585488	0.0770014	0.59979	0.0769194	0.602219	0.0775235	0.587731	0.0769887	0.583105	0.077286	0.619822	0.0772877	0.602376	0.0769666	0.585296	0.0768738	0.597617	0.077696	0.592632	0.0774514	0.601531	0.0769218	0.597656	0.0777727	0.614352	0.0773734
		0.621917	0.0775005	0.598168	0.0766458			0.57717	0.0759018	0.571597	0.0755153	0.575297	0.0759889	0.600604	0.0756127	0.583618	0.0768356	0.598097	0.0767069	0.600015	0.0773396	0.586437	0.0768445	0.581624	0.0771108	0.618493	0.0771296	0.601494	0.0768175	0.584426	0.0766912	0.595373	0.0775661	0.591243	0.0772684	0.60061	0.0767164	0.596234	0.0775924	0.6135	0.0771881
		IsoLine	IsoLine	0.601096	0.0769562			0.575893	0.0757417	0.570894	0.075361	0.573915	0.0758113	0.599892	0.075431	0.581944	0.076659	0.59658	0.0764873	0.59804	0.0771433	0.585489	0.076697	0.580298	0.0769281	0.617303	0.0769657	0.600848	0.0766698	0.583789	0.0765146	0.593363	0.0774243	0.59	0.0770797	0.599937	0.0765209	0.594961	0.0774061	0.612878	0.0770113
				0.604029	0.0772667			0.574789	0.0755771	0.570466	0.0752113	0.572721	0.0756291	0.59946	0.075259	0.580497	0.0764753	0.595271	0.0762648	0.596334	0.0769385	0.58491	0.0765502	0.579153	0.0767416	0.616275	0.0767992	0.600456	0.0765278	0.583405	0.0763488	0.591624	0.0772732	0.588926	0.0768891	0.599531	0.0763406	0.593863	0.0772172	0.612502	0.0768479
				0.606968	0.0775773			0.57388	0.0754112	0.570327	0.0750703	0.571738	0.0754457	0.599322	0.0751017	0.579305	0.0762878	0.594194	0.0760438	0.594928	0.0767292	0.584717	0.0764081	0.57821	0.0765549	0.61543	0.0766335	0.600328	0.0763951	0.583282	0.0761983	0.590192	0.0771159	0.588044	0.0767002	0.599404	0.0761804	0.592959	0.0770294	0.612383	0.0767023
				0.609912	0.077888			0.573185	0.0752471	0.570478	0.0749419	0.570986	0.0752646	0.599479	0.0749631	0.578392	0.0761004	0.59337	0.0758286	0.593851	0.0765194	0.584916	0.0762746	0.57749	0.0763716	0.614783	0.0764716	0.600468	0.0762754	0.583425	0.0760672	0.589093	0.0769554	0.587369	0.0765167	0.599557	0.0760448	0.592268	0.0768464	0.612525	0.0765784
				0.612861	0.0781988			0.572716	0.0750881	0.570917	0.0748295	0.570479	0.0750895	0.599929	0.0748472	0.577776	0.0759165	0.592816	0.0756234	0.593124	0.0763132	0.5855	0.0761533	0.577004	0.0761953	0.614348	0.0763168	0.600872	0.076172	0.58383	0.0759591	0.58835	0.0767948	0.586915	0.0763422	0.599988	0.0759373	0.591803	0.0766718	0.612922	0.0764797
				0.615816	0.0785097			0.572483	0.0749373	0.57163	0.0747362	0.570228	0.0749237	0.600658	0.074757	0.577468	0.0757399	0.592542	0.0754321	0.59276	0.0761146	0.586455	0.0760475	0.576764	0.0760295	0.614132	0.0761721	0.60153	0.0760878	0.584485	0.0758769	0.587976	0.0766373	0.586692	0.0761801	0.600684	0.0758609	0.591574	0.0765089	0.613565	0.0764088
				0.618776	0.0788207			0.57249	0.0747976	0.572599	0.0746646	0.570236	0.0747705	0.601647	0.0746951	0.577474	0.0755739	0.592554	0.0752585	0.592766	0.0759275	0.587753	0.0759602	0.576773	0.0758773	0.61414	0.0760402	0.602422	0.0760249	0.585373	0.075823	0.587979	0.0764859	0.586702	0.0760335	0.601627	0.0758177	0.591584	0.076361	0.614436	0.0763677
				0.621741	0.0791318			0.572738	0.0746717	0.573798	0.0746166	0.570504	0.0746328	0.602869	0.0746631	0.577795	0.0754218	0.592851	0.075106	0.593144	0.0757556	0.58936	0.0758936	0.577032	0.0757418	0.614372	0.0759238	0.603525	0.0759852	0.58647	0.0757987	0.588359	0.0763435	0.586947	0.0759054	0.60279	0.0758089	0.591833	0.0762309	0.61551	0.0763576
				0.624712	0.0794429			0.57322	0.0745621	0.575193	0.0745936	0.571027	0.0745133	0.60429	0.0746618	0.578424	0.0752864	0.593428	0.0749776	0.593884	0.0756022	0.591232	0.0758497	0.577535	0.0756255	0.614824	0.0758252	0.604809	0.0759696	0.587744	0.0758047	0.589108	0.076213	0.587421	0.0757981	0.604143	0.0758347	0.592318	0.0761211	0.61676	0.0763786
				0.627689	0.0797541			0.573929	0.0744709	0.576746	0.074596	0.571794	0.0744143	0.605873	0.0746914	0.579349	0.0751706	0.594273	0.0748756	0.594973	0.0754702	0.593317	0.0758296	0.578273	0.0755307	0.615486	0.0757461	0.606239	0.0759787	0.589163	0.0758409	0.590212	0.0760968	0.588115	0.0757137	0.605647	0.0758945	0.593027	0.0760338	0.61815	0.0764302
				0.630671	0.0800655			0.57485	0.0743999	0.578416	0.074624	0.572791	0.0743379	0.607572	0.0747511	0.580551	0.0750765	0.59537	0.0748022	0.59639	0.0753622	0.595559	0.0758338	0.57923	0.0754593	0.616345	0.0756883	0.607775	0.0760122	0.590687	0.0759062	0.59165	0.0759973	0.589016	0.075654	0.607263	0.0759865	0.593948	0.0759706	0.619643	0.076511
				0.633658	0.0803769			0.575965	0.0743505	0.580156	0.0746767	0.573997	0.0742853	0.609343	0.0748391	0.582008	0.0750059	0.596697	0.0747588	0.598107	0.0752804	0.597897	0.0758623	0.58039	0.0754126	0.617386	0.0756527	0.609376	0.0760691	0.592274	0.0759989	0.593393	0.0759163	0.590105	0.0756201	0.608946	0.0761083	0.595062	0.0759329	0.621198	0.0766187
				0.636651	0.0806884			0.577252	0.0743235	0.581919	0.0747527	0.575391	0.0742578	0.611137	0.0749531	0.583691	0.0749603	0.59823	0.0747461	0.600091	0.0752264	0.600266	0.0759143	0.581728	0.0753916	0.618587	0.0756402	0.610998	0.076148	0.593882	0.0761165	0.595408	0.0758555	0.591363	0.0756125	0.610649	0.0762566	0.596348	0.0759213	0.622772	0.0767506
				0.639649	0.081			0.578687	0.0743197	0.583657	0.0748499	0.576944	0.0742558	0.612905	0.07509	0.585568	0.0749404	0.599937	0.0747645	0.602302	0.0752011	0.602602	0.0759883	0.583219	0.0753967	0.619925	0.0756508	0.612597	0.0762466	0.595466	0.0762558	0.597655	0.0758161	0.592763	0.0756316	0.612328	0.0764272	0.597781	0.0759361	0.624324	0.0769029
				0.639649	0.081			0.580242	0.074339	0.585323	0.0749656	0.578626	0.0742793	0.614599	0.075246	0.587601	0.0749468	0.601785	0.0748136	0.604699	0.0752051	0.604842	0.0760823	0.584835	0.0754277	0.621375	0.0756846	0.61413	0.0763623	0.596983	0.0764129	0.60009	0.0757987	0.59428	0.0756769	0.613935	0.0766157	0.599333	0.0759769	0.625809	0.0770715
				IsoLine	IsoLine			0.581885	0.074381	0.586871	0.0750968	0.580405	0.0743279	0.616172	0.075417	0.589752	0.0749792	0.60374	0.0748924	0.607233	0.0752383	0.606925	0.0761938	0.586542	0.0754842	0.622907	0.0757406	0.615554	0.0764919	0.598392	0.0765835	0.602667	0.0758037	0.595884	0.0757475	0.615427	0.0768167	0.600973	0.076043	0.627189	0.0772518
								0.583586	0.074445	0.588259	0.0752397	0.582245	0.0744007	0.617582	0.0755981	0.591978	0.0750371	0.605762	0.0749994	0.609857	0.0753	0.608793	0.0763198	0.588309	0.0755649	0.624493	0.075818	0.61683	0.0766319	0.599654	0.0767631	0.605334	0.0758311	0.597543	0.0758421	0.616764	0.0770249	0.60267	0.0761331	0.628424	0.0774389
								0.585311	0.0745296	0.589449	0.0753906	0.584112	0.0744962	0.61879	0.0757846	0.594235	0.0751193	0.607812	0.0751325	0.612519	0.0753891	0.610395	0.0764567	0.590101	0.0756683	0.626101	0.0759152	0.617924	0.0767784	0.600736	0.0769467	0.608041	0.0758804	0.599224	0.0759588	0.617908	0.0772345	0.604391	0.0762455	0.629482	0.0776276
								0.587027	0.0746333	0.590408	0.0755454	0.585969	0.0746125	0.619763	0.0759712	0.596481	0.0752242	0.609851	0.0752892	0.615166	0.0755038	0.611688	0.0766009	0.591883	0.0757923	0.6277	0.0760302	0.618806	0.0769275	0.601606	0.0771293	0.610734	0.0759504	0.600897	0.0760953	0.618829	0.0774399	0.606102	0.0763779	0.630334	0.0778129
								0.5887	0.074754	0.591111	0.0756997	0.587779	0.0747475	0.620475	0.076153	0.598672	0.0753498	0.611838	0.0754663	0.617749	0.0756419	0.612637	0.0767484	0.59362	0.0759347	0.629259	0.0761609	0.619452	0.0770751	0.602242	0.0773059	0.613361	0.0760399	0.602526	0.076249	0.619502	0.0776353	0.60777	0.0765278	0.630956	0.0779897
								0.590298	0.0748894	0.591538	0.0758494	0.589507	0.0748985	0.620907	0.0763249	0.600764	0.0754937	0.613736	0.0756604	0.620215	0.0758007	0.613216	0.0768952	0.595279	0.0760926	0.630747	0.0763047	0.619844	0.0772172	0.602627	0.0774717	0.61587	0.0761472	0.604082	0.0764169	0.619908	0.0778156	0.609362	0.0766922	0.631332	0.0781532
								0.591789	0.0750369	0.591678	0.0759903	0.59112	0.0750625	0.621045	0.0764823	0.602717	0.0756529	0.615506	0.0758678	0.622518	0.075977	0.613409	0.0770373	0.596826	0.0762629	0.632136	0.0764588	0.619972	0.0773499	0.60275	0.0776222	0.618214	0.0762702	0.605534	0.0765957	0.620036	0.0779758	0.610848	0.076868	0.63145	0.0782988
								0.593144	0.0751935			0.592587	0.0752363			0.604493	0.0758245	0.617115	0.0760844	0.624612	0.0761676			0.598233	0.0764423	0.633399	0.0766202					0.620346	0.0764063	0.606853	0.076782			0.612198	0.0770518
								0.594338	0.0753562			0.593878	0.0754167			0.606058	0.0760051	0.618532	0.076306	0.626458	0.0763686			0.599472	0.0766273	0.63451	0.0767858					0.622225	0.0765531	0.608015	0.0769721			0.613387	0.0772399
								0.595347	0.0755219			0.594969	0.0756			0.607381	0.0761911	0.619728	0.0765283	0.628017	0.0765762			0.600518	0.0768144	0.635449	0.0769523					0.623815	0.0767077	0.608995	0.0771623			0.614391	0.0774287
								0.59615	0.0756873			0.595839	0.0757826			0.608436	0.076379	0.62068	0.0767469	0.629262	0.0767863			0.601352	0.0769998	0.636197	0.0771165					0.625083	0.076867	0.609775	0.077349			0.61519	0.0776145
								0.596734	0.0758492			0.59647	0.0759611			0.609202	0.0765651	0.621371	0.0769576	0.630166	0.0769948			0.601956	0.07718	0.636739	0.0772752					0.626007	0.0770279	0.610341	0.0775284			0.615769	0.0777937
								0.597086	0.0760045			0.59685	0.076132			0.609665	0.0767458	0.621786	0.0771564	0.630713	0.0771977			0.60232	0.0773515	0.637065	0.0774253					0.626567	0.0771874	0.61068	0.0776971			0.616117	0.0779629
								0.597199	0.0761501			0.596972	0.0762919			0.609817	0.0769176	0.621917	0.0773392	0.630892	0.077391			0.602436	0.0775109	0.637169	0.077564					0.626753	0.0773423	0.610787	0.0778518			0.616227	0.0781187

[truncated: 1 more sheets: entregar - entregar]
